# Supplementary material for: Identification of Stable and Multiple Environment Interaction QTLs and Candidate Genes for Fiber Productive Traits Under Irrigated and Water Stress Conditions Using Intraspecific RILs of Gossypium hirsutum var. MCU5 X TCH1218
Source: Front Plant Sci. 2022 Apr 18;13:851504. doi: 10.3389/fpls.2022.851504 (PMC9062235; doi:10.3389/fpls.2022.851504)
Supplement: Supplementary file 1 [file Table_1.XLSX]

## Sheet: Sheet1
Supplementary Table S1 QTLs identified for the traits that are investigated in this study. QTL nomenclature: qPH-c08-1 can be interpreted as: first letter“q”to represent QTL;second two letters to represent trait name (PH for plant height, SYM for number of sympodial, BN for number of bolls and BW for boll weight) under irrigated conditions (if there is _S suffix after the trait name, it means tha…
Trait	QTL designation	Year or Trial ID	Flanking Markers	Position (cM)	LR	Additive	Dominant	Main Effect	R2/ PVE(%)	QTL LOD
								(D/A)
PH	qPH-c08-1	T8	AX-180653132-AX-182254563	174.11	20.13	4.9157	14.7266	2.99583	3.5533	4.2
PH	qPH-c09-1	T1	AX-184973861-AX-176833420	20.01	16.25	-1.1294	-36.8499	32.6279	1.4597	2.2
PH	qPH-c11-1	T3	AX-176836296-AX-182226957	51.11	87.89	-47.3789	41.377	-0.87332	38.4169	18.3
PH	qPH-c12-1	T8	AX-182254113-AX-176830880	83.91	24.01	-1.7121	-17.1998	10.046	0.0391	4.1
PH	qPH-c25-1	T4	AX-176833130-AX-176837147	30.51	15.15	15.9643	14.7893	0.926398	5.2104	2.7
PH	qPH-c26-3	T3	AX-182254129-AX-182226747	55.91	91.77	-47.1439	43.6916	-0.92677	0.017	18.5
PH	qPH_S-c16-1	T6	AX-182254697-AX-182258457	2.11	77.4	46.0534	50.8607	1.10438	0.0432	13.4
PH	qPH_S-c16-2	T7	AX-182254697-AX-182258457	79.11	96.93	-62.0045	29.7266	-0.47943	19.3966	13.4
SYM	qSYM-c02-1	T4	AX-176833436-AX-182263372	18.01	40.15	25.0742	-95.9166	-3.82531	63.678	7.8
SYM	qSYM-c03-1	T4	AX-182246664-AX-182253828	92.41	41.7	-10.5597	-98.4193	9.32027	1.7212	7.8
SYM	qSYM-c03-2	T4	AX-176831854-AX-176835952	151.51	40.85	7.7103	-98.9603	-12.8348	35.3945	7.8
SYM	qSYM-c04-1	T4	AX-182249461-AX-176883453	78.21	36.09	13.2682	96.4678	7.2706	85.738	7.6
SYM	qSYM-c07-1	T8	AX-182241023-AX-182253823	152.61	30.58	-1.5866	0.1382	-0.0871	86.546	5.8
SYM	qSYM-c08-1	T8	AX-182233975-AX-180648567	46.11	27.71	1.4851	0.2681	0.180527	33.8622	5.8
SYM	qSYM-c09-1	T4	AX-182229530-AX-176883249	33.41	36.25	-67.663	-3.5229	0.052065	47.5621	5.3
SYM	qSYM-c10-1	T8	AX-176840552-AX-182260360	12.01	27.72	-1.5617	0.2114	-0.13537	69.026	5.5
SYM	qSYM-c11-1	T4	AX-176836296-AX-182226957	58.11	36.52	21.2507	94.8709	4.46437	1.2112
SYM	qSYM-c11-2	T4	AX-180652377-AX-176836186	140.81	36.26	5.5736	95.5265	17.1391	2.4612
SYM	qSYM-c15-1	T3	AX-182239815-AX-182262522	126.81	54.63	-20.5227	-71.0843	3.46369	23.3519	9.6
SYM	qSYM-c15-2	T4	AX-182239815-AX-182262522	127.81	58.31	-28.2249	-91.8664	3.2548	22.0017	9.1
SYM	qSYM-c17-1	T4	AX-182256922-AX-182258401	15.91	47.95	-17.8956	97.7136	-5.4602	74.7797	8.8
SYM	qSYM-c18-1	T4	AX-182256182-AX-176832479	291.41	47.34	-28.6191	94.3655	-3.29729	87.3863	8.6
SYM	qSYM-c18-2	T4	AX-182256182-AX-176832479	299.41	47.16	-68.1079	1.9272	-0.0283	87.8351	8.6
SYM	qSYM-c18-3	T4	AX-176835242-AX-182255051	319.61	55.48	-68.3815	1.5155	-0.02216	87.3507	8.6
SYM	qSYM-c21-1	T4	AX-182262518-AX-176832011	52.41	8.5	39.6384	0	0	8.4732	1.6
SYM	qSYM-c22-1	T3	AX-182254626-AX-182258142	42.11	46.71	-51.8581	-1.0352	0.019962	80.3346
SYM	qSYM-c22-2	T3	AX-182254626-AX-182258142	47.11	54.42	-21.1143	-70.07	3.3186	25.73
SYM	qSYM-c22-3	T3	AX-182258142-AX-182256858	62.11	49.24	-18.2436	-69.9692	3.83527	14.1511
SYM	qSYM-c22-4	T3	AX-182254626-AX-182258142	44.11	57.51	-29.7937	-92.3846	3.10081	29.6357	8.6
SYM	qSYM-c22-5	T3	AX-182258142-AX-182256858	63.11	46.82	-25.2317	-90.2036	3.57501	7.065	8.6
SYM	qSYM-c23-1	T3	AX-176834296-AX-182247069	91.11	46.32	-28.3905	-98.4874	3.46903	23.2754	8.8
SYM	qSYM-c25-2	T8	AX-182254580-AX-182243698	43.31	12.17	0.0667	-1.0577	-15.8576	2.2611	2.4
SYM	qSYM-c25-3	T8	AX-182255503-AX-176832520	53.41	13.87	-0.1249	-1.7309	13.8583	2.9807	2.4
SYM	qSYM_S-c7-1	T6	AX-182233731-AX-182241023	134.51	11.6	2.5465	-0.077	-0.03024	8.4425	2.4
SYM	qSYM_S-c9-1	T6	AX-182229530-AX-176883249	31.41	21.32	4.609	-1.278	-0.27728	25.8942	2.2
SYM	qSYM_S-c14-1	T7	AX-182256274-AX-176831094	3.01	11.5	1.7582	-3.6041	-2.04988	6.9284	2.3
SYM	qSYM_S-c14-2	T7	AX-176832073-AX-180651331	8.31	11.58	1.8467	-6.3332	-3.42947	7.2425	2.3
SYM	qSYM_S-c15-1	T6	AX-176835896-AX-182239815	118.61	14.57	2.3089	-2.6836	-1.16229	8.9881	2.4
SYM	qSYM_S-c18-1	T7	AX-182256182-AX-176832479	306.41	15.29	8.7063	3.5054	0.402628	6.1146	3.6
SYM	qSYM_S-c18-2	T7	AX-176835242-AX-182255051	312.61	15.7	8.8199	3.4573	0.391989	6.0037	3.6
SYM	qSYM_S-c21-1	T6	AX-182255439-AX-176832011	55.41	14.11	-6.8642	4.7052	-0.68547	67.9549	3.6
SYM	qSYM_S-c22-1	T6	AX-182254626-AX-182258142	54.11	11.4	5.8566	-1.1561	-0.1974	21.0732	3.6
SYM	qSYM_S-c22-2	T7	AX-182256858-AX-182264770	82.81	18.16	-8.2598	5.1913	-0.6285	88.0188	3.6
SYM	qSYM_S-c24-1	T6	AX-176834369-AX-182254666	109.71	27.77	10.583	1.7828	0.168459	26.2562	3.5
BN	qBN-c05-1	T3	AX-182253211-AX-182247753	158.11	12.3	-0.7608	0.6414	-0.84306	81.3437	7.5
BN	qBN-c07-1	T8	AX-180650496-AX-182233731	123.01	12.87	-0.4515	2.3607	-5.22857	5.2111	2.6
BN	qBN-c11-1	T8	AX-176836296-AX-182226957	22.11	16.93	-3.8471	-0.3923	0.101973	15.7523	3
BN	qBN-c13-1	T3	AX-176882283-AX-176835551	6.61	9.79	-2.1533	1.2887	-0.59848	7.3001	2
BN	qBN-c17-1	T8	AX-182258401-AX-176851342	38.11	13.91	-0.5139	2.3274	-4.5289	5.2995	2.5
BN	qBN-c26-1	T6	AX-182226747-AX-180652868	110.51	34.83	-2.5734	8.3187	-3.23257	83.6198	7.9
BN	qBN-c26-2	T8	AX-182256766-AX-182253635	0.01	12.99	-0.644	1.5221	-2.36351	7.2519	2.5
BW	qBW-c05-2	T4	AX-182253211-AX-182247753	158.11	12.3	-0.7608	0.6414	-0.84306	81.3437	2.3
BW	qBW-c24-1	T6	AX-182258056-AX-176831424	81.31	17.94	-0.2815	-1.0112	3.59219	7.1388
