# Supplementary material for: Identification of Stable and Multiple Environment Interaction QTLs and Candidate Genes for Fiber Productive Traits Under Irrigated and Water Stress Conditions Using Intraspecific RILs of Gossypium hirsutum var. MCU5 X TCH1218
Source: Front Plant Sci. 2022 Apr 18;13:851504. doi: 10.3389/fpls.2022.851504 (PMC9062235; doi:10.3389/fpls.2022.851504)
Supplement: Supplementary file 2 [file Table_2.XLSX]

## Sheet: candidate genes
Supplementary Table 2 List of candidate genes found in the QTLs identified in this study. QTL nomenclature is same as in Table 6.
				TM1 Physical map position
QTL	Gene ID	Gene Name	Description	Start	End
qPH-c11-1	Gh_A11G0499	DRG3	Developmentally-regulated G-protein 3	4680349	4685257
qPH-c11-1	Gh_A11G0500	NA	NA	4686439	4687608
qPH-c11-1	Gh_A11G0501	At5g64816	Uncharacterized protein At5g64816	4688721	4689101
qPH-c11-1	Gh_A11G0502	At5g64813	Uncharacterized GTP-binding protein At5g64813	4690888	4693544
qPH-c11-1	Gh_A11G0503	At2g21870	Probable ATP synthase 24 kDa subunit, mitochondrial	4713049	4718784
qPH-c11-1	Gh_A11G0504	NA	Systemin receptor SR160	4723387	4726971
qPH-c11-1	Gh_A11G0505	UDP-GALT2	UDP-galactose transporter 2	4737751	4741174
qPH-c11-1	Gh_A11G0506	NA	NA	4751867	4754267
qPH-c11-1	Gh_A11G0507	Rpp25l	Ribonuclease P protein subunit p25-like protein	4756389	4758020
qPH-c11-1	Gh_A11G0508	NA	NA	4759663	4759995
qPH-c11-1	Gh_A11G0509	At1g25270	WAT1-related protein At1g25270	4763131	4765479
qPH-c11-1	Gh_A11G0510	NA	NA	4767568	4769003
qPH-c11-1	Gh_A11G0511	CARA	Carbamoyl-phosphate synthase small chain, chloroplastic	4773375	4776126
qPH-c11-1	Gh_A11G0512	ACT7	Actin-7	4777393	4779239
qPH-c11-1	Gh_A11G0513	At5g18390	Pentatricopeptide repeat-containing protein At5g18390, mitochondrial	4780294	4782020
qPH-c11-1	Gh_A11G0514	DGAT2	Diacylglycerol O-acyltransferase 2	4808596	4812266
qPH-c11-1	Gh_A11G0515	DGAT2	Diacylglycerol O-acyltransferase 2	4815656	4818100
qPH-c11-1	Gh_A11G0516	DGAT2	Diacylglycerol O-acyltransferase 2	4818874	4837691
qPH-c11-1	Gh_A11G0517	IDL2	Protein IDA-LIKE 2	4843227	4843460
qPH-c11-1	Gh_A11G0518	PUB27	U-box domain-containing protein 27	4856217	4857434
qPH-c11-1	Gh_A11G0519	GUX1	UDP-glucuronate:xylan alpha-glucuronosyltransferase 1	4890579	4893322
qPH-c11-1	Gh_A11G0520	PME51	Probable pectinesterase/pectinesterase inhibitor 51	4904140	4906162
qPH-c11-1	Gh_A11G0521	ADH1	Alcohol dehydrogenase 1	4907726	4910383
qPH-c11-1	Gh_A11G0522	ADH1	Alcohol dehydrogenase 1	4911231	4913391
qPH-c11-1	Gh_A11G0523	PER72	Peroxidase 72	4917637	4918870
qPH-c11-1	Gh_A11G0524	NAC082	NAC domain-containing protein 82	4921702	4922748
qPH-c11-1	Gh_A11G0525	SKIP25	F-box/kelch-repeat protein SKIP25	4934102	4935205
qPH-c11-1	Gh_A11G0526	csd	Probable cysteine desulfurase	4940056	4943157
qPH-c11-1	Gh_A11G0527	FTSHI4	Probable inactive ATP-dependent zinc metalloprotease FTSHI 4, chloroplastic	4944244	4953913
qPH-c11-1	Gh_A11G0528	YUC10	Probable indole-3-pyruvate monooxygenase YUCCA10	4966213	4968010
qPH-c11-1	Gh_A11G0529	SEU	Transcriptional corepressor SEUSS	4972397	4980333
qPH-c11-1	Gh_A11G0530	CHX15	Cation/H(+) antiporter 15	4985008	4987734
qPH_S-c16-2	Gh_A07G1364	NA	NA	34656628	34659068
qPH_S-c16-2	Gh_A07G1365	CDS4	Phosphatidate cytidylyltransferase 4, chloroplastic	34843661	34846896
qPH_S-c16-2	Gh_A07G1366	NA	NA	34847455	34851514
qPH_S-c16-2	Gh_A07G1367	SEC16B	Protein transport protein SEC16B homolog	34868855	34875764
qPH_S-c16-2	Gh_A07G1368	ZAT9	Zinc finger protein ZAT9	35007732	35008844
qPH_S-c16-2	Gh_A07G1369	NA	NA	35012981	35013154
qPH_S-c16-2	Gh_A07G1370	ZAT3	Zinc finger protein ZAT3	35210036	35211445
qPH_S-c16-2	Gh_A07G1371	NA	NA	35377797	35381094
qPH_S-c16-2	Gh_A07G1372	PAP11	Probable plastid-lipid-associated protein 11	35382180	35383211
qPH_S-c16-2	Gh_A07G1373	NA	NA	35624672	35625766
qPH_S-c16-2	Gh_A07G1374	NA	NA	35705172	35705387
qPH_S-c16-2	Gh_A07G1375	SPL8	Squamosa promoter-binding-like protein 8	35892163	35896289
qPH_S-c16-2	Gh_A07G1376	MEFG2	Elongation factor G-2, mitochondrial	35924679	35930300
qPH_S-c16-2	Gh_A07G1377	ATG3	Autophagy-related protein 3	35954092	35956323
qPH_S-c16-2	Gh_A07G1378	ERF034	Ethylene-responsive transcription factor ERF034	36089627	36090340
qPH_S-c16-2	Gh_A07G1379	NA	NA	36091848	36092915
qPH_S-c16-2	Gh_A07G1380	NA	NA	36167509	36167859
qPH_S-c16-2	Gh_A07G1381	ERF098	Ethylene-responsive transcription factor ERF098	36336595	36337041
qPH_S-c16-2	Gh_A07G1382	ERF098	Ethylene-responsive transcription factor ERF098	36337620	36338027
qPH_S-c16-2	Gh_A07G1383	ADF6	Actin-depolymerizing factor 6	36507246	36508526
qPH_S-c16-2	Gh_A07G1384	NA	NA	36672202	36674289
qPH_S-c16-2	Gh_A07G1385	MYB4	Myb-related protein Myb4	36833226	36834674
qPH_S-c16-2	Gh_A07G1386	NA	NA	36868363	36868908
qPH_S-c16-2	Gh_A07G1387	NA	NA	36871397	36872061
qPH_S-c16-2	Gh_A07G1388	Hgs	Hepatocyte growth factor-regulated tyrosine kinase substrate	37004842	37009742
qPH_S-c16-2	Gh_A07G1389	NA	NA	37161253	37161696
qPH_S-c16-2	Gh_A07G1390	imp1	Mitochondrial inner membrane protease subunit 1	37178965	37181803
qPH_S-c16-2	Gh_A07G1391	pol	Retrovirus-related Pol polyprotein from transposon 17.6	37346437	37347606
qPH_S-c16-2	Gh_A07G1392	PUB3	U-box domain-containing protein 3	37404047	37407991
qPH_S-c16-2	Gh_A07G1393	LSH3	Protein LIGHT-DEPENDENT SHORT HYPOCOTYLS 3	37700851	37701420
qPH_S-c16-2	Gh_A07G1394	NA	NA	37725927	37728041
qPH_S-c16-2	Gh_A07G1395	At1g65750	Putative ribonuclease H protein At1g65750	37950747	37951100
qPH_S-c16-2	Gh_A07G1396	SETH3	Probable arabinose 5-phosphate isomerase	38033421	38034894
qPH_S-c16-2	Gh_A07G1397	JMJ703	Lysine-specific demethylase JMJ703	38035693	38039549
qPH_S-c16-2	Gh_A07G1398	NA	NA	38378998	38380023
qPH_S-c16-2	Gh_A07G1399	NA	NA	38389854	38390896
qPH_S-c16-2	Gh_A07G1400	NA	NA	38496048	38497577
qPH_S-c16-2	Gh_A07G1401	NA	NA	38733181	38733840
qPH_S-c16-2	Gh_A07G1402	NAC021	NAC domain-containing protein 21/22	38822587	38826699
qPH_S-c16-2	Gh_A07G1403	At1g04430	Probable methyltransferase PMT8	38841822	38844236
qPH_S-c16-2	Gh_A07G1404	RPN2	Dolichyl-diphosphooligosaccharide--protein glycosyltransferase subunit 2	38845768	38860453
qPH_S-c16-2	Gh_A07G1405	NA	NA	38925697	38927473
qPH_S-c16-2	Gh_A07G1406	NA	NA	38933692	38935423
qPH_S-c16-2	Gh_A07G1407	At1g03900	Uncharacterized protein At1g03900	38979999	38982154
qPH_S-c16-2	Gh_A07G1408	At4g26100	Casein kinase I isoform delta-like	38992841	38997693
qPH_S-c16-2	Gh_A07G1409	VPS2.3	Vacuolar protein sorting-associated protein 2 homolog 3	39017291	39019375
qPH_S-c16-2	Gh_A07G1410	NA	NA	39020646	39020846
qPH_S-c16-2	Gh_A07G1411	B''ALPHA	Serine/threonine protein phosphatase 2A regulatory subunit B''alpha	39058835	39064242
qPH_S-c16-2	Gh_A07G1412	PII-2	Piriformospora indica-insensitive protein 2	39067412	39068794
qPH_S-c16-2	Gh_A07G1413	NA	NA	39183462	39185016
qPH_S-c16-2	Gh_A07G1414	At1g65750	Putative ribonuclease H protein At1g65750	39197183	39197658
qPH_S-c16-2	Gh_A07G1415	FAO2	Long-chain-alcohol oxidase FAO2	39380261	39383622
qPH_S-c16-2	Gh_A07G1416	At2g20420	Succinyl-CoA ligase [ADP-forming] subunit beta, mitochondrial	39384047	39398421
qPH_S-c16-2	Gh_A07G1417	NPF5.2	Protein NRT1/ PTR FAMILY 5.2	39433671	39436404
qPH_S-c16-2	Gh_A07G1418	APS1	Acid phosphatase 1	39515274	39516208
qPH_S-c16-2	Gh_A07G1419	NA	NA	39517240	39517509
qPH_S-c16-2	Gh_A07G1420	NA	NA	39519400	39526057
qPH_S-c16-2	Gh_A07G1421	RPL23A	60S ribosomal protein L23	39528338	39529470
qPH_S-c16-2	Gh_A07G1422	yqjG	Glutathionyl-hydroquinone reductase YqjG	39529894	39531651
qPH_S-c16-2	Gh_A07G1423	TAF6	Transcription initiation factor TFIID subunit 6	39533994	39536818
qPH_S-c16-2	Gh_A07G1424	NA	NA	39656954	39658169
qPH_S-c16-2	Gh_A07G1425	prpf39	Pre-mRNA-processing factor 39	39695941	39708191
qPH_S-c16-2	Gh_A07G1426	nxt3	Putative G3BP-like protein	39709142	39713221
qPH_S-c16-2	Gh_A07G1427	NA	NA	39715467	39718019
qPH_S-c16-2	Gh_A07G1428	IAA11	Auxin-responsive protein IAA11	39731768	39734455
qPH_S-c16-2	Gh_A07G1429	PXL2	Leucine-rich repeat receptor-like protein kinase PXL2	39735055	39738203
qPH_S-c16-2	Gh_A07G1430	TNEA_C	Probable aminopyrimidine aminohydrolase, mitochondrial	39776919	39780056
qPH_S-c16-2	Gh_A07G1431	PSB28	Photosystem II reaction center PSB28 protein, chloroplastic	39792073	39793086
qPH_S-c16-2	Gh_A07G1432	SBT1.2	Subtilisin-like protease SBT1.2	39793595	39795973
qPH_S-c16-2	Gh_A07G1433	YAK1	Dual specificity protein kinase YAK1	39798977	39803081
qPH_S-c16-2	Gh_A07G1434	KAM1	Xyloglucan galactosyltransferase KATAMARI1	39804850	39806589
qPH_S-c16-2	Gh_A07G1435	NA	NA	39810117	39810479
qPH_S-c16-2	Gh_A07G1436	ABCC5	ABC transporter C family member 5	39840743	39848627
qPH_S-c16-2	Gh_A07G1437	NA	NA	39896743	39898067
qPH_S-c16-2	Gh_A07G1438	NA	NA	39908188	39908424
qPH_S-c16-2	Gh_A07G1439	ELI5	Tyrosine decarboxylase 1	39953284	39968990
qPH_S-c16-2	Gh_A07G1440	NA	NA	39976699	39977287
qPH_S-c16-2	Gh_A07G1441	ADH2	Alcohol dehydrogenase class-3	39978498	39980925
qPH_S-c16-2	Gh_A07G1442	ACX1	Peroxisomal acyl-coenzyme A oxidase 1	40009589	40011315
qPH_S-c16-2	Gh_A07G1443	Ambra1	Activating molecule in BECN1-regulated autophagy protein 1	40014391	40021256
qPH_S-c16-2	Gh_A07G1444	ALE2	Receptor-like serine/threonine-protein kinase ALE2	40133757	40140558
qPH_S-c16-2	Gh_A07G1445	At1g48120	Serine/threonine-protein phosphatase 7 long form homolog	40297250	40298519
qPH_S-c16-2	Gh_A07G1446	QKY	Protein QUIRKY	40306716	40309696
qPH_S-c16-2	Gh_A07G1447	YUC8	Probable indole-3-pyruvate monooxygenase YUCCA8	40634790	40636255
qPH_S-c16-2	Gh_A07G1448	CLASP	CLIP-associated protein	40952848	40964316
qPH_S-c16-2	Gh_A07G1449	TAR4	Tryptophan aminotransferase-related protein 4	41234641	41237258
qPH_S-c16-2	Gh_A07G1450	RPT2B	26S proteasome regulatory subunit 4 homolog B	41246113	41250479
qPH_S-c16-2	Gh_A07G1451	NA	NA	41313353	41313691
qPH_S-c16-2	Gh_A07G1452	NA	NA	41395017	41395466
qPH_S-c16-2	Gh_A07G1453	NA	NA	41467634	41468002
qPH_S-c16-2	Gh_A07G1454	NA	NA	41650492	41653274
qPH_S-c16-2	Gh_A07G1455	NA	NA	41856285	41856629
qPH_S-c16-2	Gh_A07G1456	NA	NA	41878462	41878761
qPH_S-c16-2	Gh_A07G1457	At3g52300	ATP synthase subunit d, mitochondrial	42304413	42304953
qSYM-c02-1	Gh_A02G0078	At3g59210	F-box/LRR-repeat protein At3g59210	675909	677466
qSYM-c02-1	Gh_A02G0079	RPPL1	Putative disease resistance RPP13-like protein 1	681257	694393
qSYM-c02-1	Gh_A02G0080	MMK1	Mitogen-activated protein kinase homolog MMK1	697341	704493
qSYM-c02-1	Gh_A02G0081	NA	NA	707734	708390
qSYM-c02-1	Gh_A02G0082	NA	NA	716009	717100
qSYM-c02-1	Gh_A02G0083	NA	Natterin-4	748454	754425
qSYM-c02-1	Gh_A02G0084	NA	Natterin-4	761840	763264
qSYM-c02-1	Gh_A02G0085	NA	Natterin-4	781399	781938
qSYM-c02-1	Gh_A02G0086	NA	NA	800607	803051
qSYM-c02-1	Gh_A02G0087	NA	Natterin-4	808413	809342
qSYM-c02-1	Gh_A02G0088	NA	NA	832818	837765
qSYM-c02-1	Gh_A02G0089	NA	Natterin-4	839684	841105
qSYM-c02-1	Gh_A02G0090	NA	NA	850621	851499
qSYM-c02-1	Gh_A02G0091	NA	NA	851638	852042
qSYM-c02-1	Gh_A02G0092	IQD14	Protein IQ-DOMAIN 14	853753	856166
qSYM-c02-1	Gh_A02G0093	ccdc94	Coiled-coil domain-containing protein 94 homolog	864030	864359
qSYM-c02-1	Gh_A02G0094	At1g03370	C2 and GRAM domain-containing protein At1g03370	873691	881518
qSYM-c02-1	Gh_A02G0095	BHLH113	Transcription factor bHLH113	882481	884714
qSYM-c02-1	Gh_A02G0096	SPBC4B4.04	Eukaryotic translation initiation factor 2A	894467	899197
qSYM-c02-1	Gh_A02G0097	RGA3	Putative disease resistance protein RGA3	901197	904325
qSYM-c02-1	Gh_A02G0098	At4g27190	Disease resistance protein At4g27190	905322	910121
qSYM-c02-1	Gh_A02G0099	NA	NA	912970	913795
qSYM-c02-1	Gh_A02G0100	PGM1	2,3-bisphosphoglycerate-independent phosphoglycerate mutase	916370	919952
qSYM-c02-1	Gh_A02G0101	NAC014	NAC domain-containing protein 14	922346	930754
qSYM-c02-1	Gh_A02G0102	NLP8	Protein NLP8	931389	935261
qSYM-c02-1	Gh_A02G0103	Os03g0733400	Zinc finger BED domain-containing protein RICESLEEPER 2	935425	944617
qSYM-c02-1	Gh_A02G0104	RGA2	DELLA protein RGA2	964684	970826
qSYM-c02-1	Gh_A02G0105	Os05g0583200	Zinc finger BED domain-containing protein RICESLEEPER 3	973061	981654
qSYM-c02-1	Gh_A02G0106	GAI	DELLA protein GAI	986014	987192
qSYM-c02-1	Gh_A02G0107	Os03g0733400	Zinc finger BED domain-containing protein RICESLEEPER 2	994297	996893
qSYM-c02-1	Gh_A02G0108	NA	NA	997098	1006417
qSYM-c02-1	Gh_A02G0109	NA	NA	1014714	1017915
qSYM-c02-1	Gh_A02G0110	CRT3	Calreticulin-3	1023477	1029075
qSYM-c02-1	Gh_A02G0111	FPA	Flowering time control protein FPA	1035378	1041366
qSYM-c02-1	Gh_A02G0112	SKIP16	F-box protein SKIP16	1046188	1049601
qSYM-c02-1	Gh_A02G0113	POSF21	Probable transcription factor PosF21	1055196	1058825
qSYM-c02-1	Gh_A02G0114	ccdc94	Coiled-coil domain-containing protein 94 homolog	1066109	1069152
qSYM-c02-1	Gh_A02G0115	RBL13	RHOMBOID-like protein 13	1072152	1072961
qSYM-c02-1	Gh_A02G0116	At4g26020	Protein At-4/1	1078544	1082841
qSYM-c02-1	Gh_A02G0117	CPL4	RNA polymerase II C-terminal domain phosphatase-like 4	1083779	1090666
qSYM-c02-1	Gh_A02G0118	CPL4	RNA polymerase II C-terminal domain phosphatase-like 4	1094572	1099252
qSYM-c02-1	Gh_A02G0119	yif1b-a	Protein YIF1B-A	1103570	1106552
qSYM-c02-1	Gh_A02G0120	ALS	Acetolactate synthase 1, chloroplastic	1111553	1112965
qSYM-c02-1	Gh_A02G0121	ALS	Acetolactate synthase 1, chloroplastic	1116828	1118807
qSYM-c02-1	Gh_A02G0122	FRS5	Protein FAR1-RELATED SEQUENCE 5	1120000	1122293
qSYM-c02-1	Gh_A02G0123	osgep	Probable tRNA N6-adenosine threonylcarbamoyltransferase	1124783	1126309
qSYM-c02-1	Gh_A02G0124	FRS5	Protein FAR1-RELATED SEQUENCE 5	1128989	1130359
qSYM-c02-1	Gh_A02G0125	CML7	Calmodulin-like protein 7	1134232	1134684
qSYM-c02-1	Gh_A02G0126	UGT92A1	UDP-glycosyltransferase 92A1	1138386	1139873
qSYM-c02-1	Gh_A02G0127	NA	NA	1173236	1175395
qSYM-c02-1	Gh_A02G0128	NA	NA	1184985	1187310
qSYM-c02-1	Gh_A02G0129	NA	NA	1261518	1261964
qSYM-c02-1	Gh_A02G0130	SAD2	Importin beta-like SAD2	1265241	1273675
qSYM-c02-1	Gh_A02G0131	At1g65240	Aspartic proteinase-like protein 2	1275619	1281269
qSYM-c02-1	Gh_A02G0132	RABA5E	Ras-related protein RABA5e	1283465	1285420
qSYM-c02-1	Gh_A02G0133	DGL	Galactolipase DONGLE, chloroplastic	1302684	1304060
qSYM-c02-1	Gh_A02G0134	NA	NA	1345801	1346361
qSYM-c02-1	Gh_A02G0135	EPSIN2	Clathrin interactor EPSIN 2	1362757	1369236
qSYM-c02-1	Gh_A02G0136	NA	NA	1453068	1454252
qSYM-c02-1	Gh_A02G0137	NA	NA	1458542	1460581
qSYM-c02-1	Gh_A02G0138	SLC35F1	Solute carrier family 35 member F1	1463938	1466239
qSYM-c02-1	Gh_A02G0139	At1g06710	Pentatricopeptide repeat-containing protein At1g06710, mitochondrial	1474094	1477203
qSYM-c02-1	Gh_A02G0140	At1g06710	Pentatricopeptide repeat-containing protein At1g06710, mitochondrial	1479371	1482712
qSYM-c02-1	Gh_A02G0141	NA	NA	1483893	1484204
qSYM-c02-1	Gh_A02G0142	PTI13	PTI1-like tyrosine-protein kinase 3	1490554	1493026
qSYM-c02-1	Gh_A02G0143	ARI7	Probable E3 ubiquitin-protein ligase ARI7	1500646	1507833
qSYM-c02-1	Gh_A02G0144	CPK24	Calcium-dependent protein kinase 24	1508323	1512491
qSYM-c02-1	Gh_A02G0145	ARL2	ADP-ribosylation factor-like protein 2	1514701	1515599
qSYM-c02-1	Gh_A02G0146	NA	NA	1518292	1519041
qSYM-c02-1	Gh_A02G0147	aasdhppt	L-aminoadipate-semialdehyde dehydrogenase-phosphopantetheinyl transferase	1528495	1534079
qSYM-c02-1	Gh_A02G0148	METTL18	Histidine protein methyltransferase 1 homolog	1536258	1539032
qSYM-c02-1	Gh_A02G0149	At2g31440	Gamma-secretase subunit APH1-like	1544175	1545987
qSYM-c02-1	Gh_A02G0150	ANAC094	Putative NAC domain-containing protein 94	1588178	1591942
qSYM-c02-1	Gh_A02G0151	At1g05910	ATPase family AAA domain-containing protein At1g05910	1594674	1608659
qSYM-c02-1	Gh_A02G0152	RPD1	Protein ROOT PRIMORDIUM DEFECTIVE 1	1614280	1615722
qSYM-c02-1	Gh_A02G0153	GDI1	Rho GDP-dissociation inhibitor 1	1618557	1620337
qSYM-c02-1	Gh_A02G0154	At1g14780	MACPF domain-containing protein At1g14780	1633356	1637309
qSYM-c02-1	Gh_A02G0155	RH21	DEAD-box ATP-dependent RNA helicase 21	1641654	1643705
qSYM-c02-1	Gh_A02G0156	Dctpp1	dCTP pyrophosphatase 1	1650702	1651718
qSYM-c02-1	Gh_A02G0157	PUP4	Probable purine permease 4	1664366	1665523
qSYM-c02-1	Gh_A02G0158	WAKL17	Wall-associated receptor kinase-like 17	1669906	1673609
qSYM-c02-1	Gh_A02G0159	WAKL1	Wall-associated receptor kinase-like 1	1702652	1709088
qSYM-c02-1	Gh_A02G0160	WAKL9	Wall-associated receptor kinase-like 9	1712150	1714472
qSYM-c02-1	Gh_A02G0161	WAKL22	Wall-associated receptor kinase-like 22	1718583	1718894
qSYM-c02-1	Gh_A02G0162	RPS1	30S ribosomal protein S1, chloroplastic	1720421	1723152
qSYM-c02-1	Gh_A02G0163	RABA5D	Ras-related protein RABA5d	1725486	1726990
qSYM-c02-1	Gh_A02G0164	BHLH62	Transcription factor bHLH62	1745614	1747359
qSYM-c02-1	Gh_A02G0165	CYS2	Cysteine proteinase inhibitor 2	1761792	1762169
qSYM-c02-1	Gh_A02G0166	FKBP65	Peptidyl-prolyl cis-trans isomerase FKBP65	1762426	1768445
qSYM-c02-1	Gh_A02G0167	SEC23	Protein transport protein SEC23	1770989	1775536
qSYM-c02-1	Gh_A02G0168	PRD1	Protein PRD1	1776402	1782325
qSYM-c02-1	Gh_A02G0169	NA	NA	1796176	1797096
qSYM-c02-1	Gh_A02G0170	CBDAS2	Cannabidiolic acid synthase-like 1	1834581	1836191
qSYM-c02-1	Gh_A02G0171	NA	NA	1838035	1838367
qSYM-c02-1	Gh_A02G0172	CBDAS2	Cannabidiolic acid synthase-like 1	1919267	1920880
qSYM-c02-1	Gh_A02G0173	NA	NA	1958680	1960113
qSYM-c02-1	Gh_A02G0174	TMK4	Receptor-like kinase TMK4	1983024	1986277
qSYM-c02-1	Gh_A02G0175	A6	Probable glucan endo-1,3-beta-glucosidase A6	1987265	1988729
qSYM-c02-1	Gh_A02G0176	PCMP-H13	Pentatricopeptide repeat-containing protein At4g14050, mitochondrial	1989653	1991485
qSYM-c02-1	Gh_A02G0177	NA	NA	2004131	2005878
qSYM-c02-1	Gh_A02G0178	SBP2	Selenium-binding protein 2	2012754	2016611
qSYM-c02-1	Gh_A02G0179	SBP1	Selenium-binding protein 1	2024195	2026661
qSYM-c02-1	Gh_A02G0180	SBP1	Selenium-binding protein 1	2028008	2029910
qSYM-c02-1	Gh_A02G0181	PPI1	Proton pump-interactor 1	2030865	2032644
qSYM-c02-1	Gh_A02G0182	HSFA5	Heat stress transcription factor A-5	2037334	2039363
qSYM-c02-1	Gh_A02G0183	RALFL31	Protein RALF-like 31	2043613	2043987
qSYM-c02-1	Gh_A02G0184	SBP2	Selenium-binding protein 2	2045435	2047145
qSYM-c02-1	Gh_A02G0185	SAHH1	Adenosylhomocysteinase 1	2048558	2050461
qSYM-c02-1	Gh_A02G0186	RAD50	DNA repair protein RAD50	2052490	2062574
qSYM-c02-1	Gh_A02G0187	EMB2752	Uncharacterized protein At4g29660	2065414	2066231
qSYM-c02-1	Gh_A02G0188	GAE6	UDP-glucuronate 4-epimerase 6	2087283	2088644
qSYM-c02-1	Gh_A02G0189	RBG2	Glycine-rich RNA-binding protein 2, mitochondrial	2093671	2094980
qSYM-c02-1	Gh_A02G0190	NA	NA	2102619	2106600
qSYM-c02-1	Gh_A02G0191	ATJ20	Chaperone protein dnaJ 20, chloroplastic	2108148	2110240
qSYM-c02-1	Gh_A02G0192	NA	NA	2114312	2118888
qSYM-c02-1	Gh_A02G0193	At4g13800	Probable magnesium transporter NIPA2	2123560	2148566
qSYM-c02-1	Gh_A02G0194	RLP12	Receptor-like protein 12	2168659	2170154
qSYM-c02-1	Gh_A02G0195	RLP12	Receptor-like protein 12	2181427	2182776
qSYM-c02-1	Gh_A02G0196	RLP12	Receptor-like protein 12	2196098	2201856
qSYM-c02-1	Gh_A02G0197	NA	Cytochrome P450 CYP749A22	2211504	2214160
qSYM-c02-1	Gh_A02G0198	NA	NA	2219639	2220502
qSYM-c02-1	Gh_A02G0199	NA	NA	2223445	2224329
qSYM-c02-1	Gh_A02G0200	NA	NA	2249418	2251598
qSYM-c02-1	Gh_A02G0201	PHT1-5	Probable inorganic phosphate transporter 1-5	2267410	2268999
qSYM-c02-1	Gh_A02G0202	PHT1-5	Probable inorganic phosphate transporter 1-5	2274354	2275943
qSYM-c02-1	Gh_A02G0203	PHT1-5	Probable inorganic phosphate transporter 1-5	2287452	2289783
qSYM-c02-1	Gh_A02G0204	NA	NA	2294035	2295162
qSYM-c02-1	Gh_A02G0205	NA	NA	2328419	2329789
qSYM-c02-1	Gh_A02G0206	TRM32	Protein TRM32	2331306	2334710
qSYM-c02-1	Gh_A02G0207	NA	Thaumatin-like protein 1	2355451	2357208
qSYM-c02-1	Gh_A02G0208	NA	NA	2359725	2362519
qSYM-c02-1	Gh_A02G0209	ARPC4	Actin-related protein 2/3 complex subunit 4	2364116	2376733
qSYM-c02-1	Gh_A02G0210	At1g04910	Uncharacterized protein At1g04910	2384920	2389786
qSYM-c02-1	Gh_A02G0211	TBC1D13	TBC1 domain family member 13	2392507	2397336
qSYM-c02-1	Gh_A02G0212	PCMP-H64	Pentatricopeptide repeat-containing protein At1g04840	2401172	2403360
qSYM-c02-1	Gh_A02G0213	UVRAG	UV radiation resistance-associated gene protein	2406635	2412585
qSYM-c02-1	Gh_A02G0214	GSO1	LRR receptor-like serine/threonine-protein kinase GSO1	2415969	2423659
qSYM-c02-1	Gh_A02G0215	At2g33170	Probable leucine-rich repeat receptor-like protein kinase At2g33170	2467075	2469926
qSYM-c02-1	Gh_A02G0216	ERD2B	ER lumen protein-retaining receptor B	2483904	2486855
qSYM-c02-1	Gh_A02G0217	PAP15	Purple acid phosphatase 15	2494278	2499127
qSYM-c02-1	Gh_A02G0218	PDCB3	PLASMODESMATA CALLOSE-BINDING PROTEIN 3	2500141	2503089
qSYM-c02-1	Gh_A02G0219	NA	Cytochrome P450 CYP749A22	2505582	2583769
qSYM-c02-1	Gh_A02G0220	NA	Cytochrome P450 CYP749A22	2588197	2590449
qSYM-c02-1	Gh_A02G0221	NA	Cytochrome P450 CYP749A22	2626808	2629514
qSYM-c02-1	Gh_A02G0222	NA	Cytochrome P450 CYP749A22	2635238	2637647
qSYM-c02-1	Gh_A02G0223	NA	Cytochrome P450 CYP749A22	2651533	2653334
qSYM-c02-1	Gh_A02G0224	NA	Cytochrome P450 CYP749A22	2685528	2686918
qSYM-c02-1	Gh_A02G0225	NA	Cytochrome P450 CYP749A22	2761074	2762953
qSYM-c02-1	Gh_A02G0226	MYOB3	Myosin-binding protein 3	2763401	2765536
qSYM-c02-1	Gh_A02G0227	APL	Myb family transcription factor APL	2765966	2768931
qSYM-c02-1	Gh_A02G0228	NA	NA	2783179	2784141
qSYM-c02-1	Gh_A02G0229	RPN2A	26S proteasome non-ATPase regulatory subunit 1 homolog A	2786551	2792507
qSYM-c02-1	Gh_A02G0230	PDCB3	PLASMODESMATA CALLOSE-BINDING PROTEIN 3	2816291	2818264
qSYM-c02-1	Gh_A02G0231	NA	NA	2820947	2824466
qSYM-c02-1	Gh_A02G0232	NA	NA	2828163	2831402
qSYM-c02-1	Gh_A02G0233	NA	NA	2872834	2875989
qSYM-c02-1	Gh_A02G0234	NA	NA	2911610	2912301
qSYM-c02-1	Gh_A02G0235	ANKRD13B	Ankyrin repeat domain-containing protein 13B	2914251	2916764
qSYM-c02-1	Gh_A02G0236	CHS1	Chalcone synthase 1	2926508	2929434
qSYM-c02-1	Gh_A02G0237	DHAD	Dihydroxy-acid dehydratase, chloroplastic	2947747	2959175
qSYM-c02-1	Gh_A02G0238	SDIR1	E3 ubiquitin-protein ligase SDIR1	2970832	2975801
qSYM-c02-1	Gh_A02G0239	EDR1	Serine/threonine-protein kinase EDR1	2978559	2983643
qSYM-c02-1	Gh_A02G0240	MPK16	Mitogen-activated protein kinase 16	2994068	2999263
qSYM-c02-1	Gh_A02G0241	BPM2	BTB/POZ and MATH domain-containing protein 2	3000107	3004266
qSYM-c02-1	Gh_A02G0242	NA	Glutamine synthetase leaf isozyme, chloroplastic	3009830	3012478
qSYM-c02-1	Gh_A02G0243	NA	NA	3018456	3018809
qSYM-c02-1	Gh_A02G0244	LAT52	Anther-specific protein LAT52	3025470	3026110
qSYM-c02-1	Gh_A02G0245	NA	NA	3030969	3039250
qSYM-c02-1	Gh_A02G0246	faeA	Probable feruloyl esterase A	3041482	3053384
qSYM-c02-1	Gh_A02G0247	GSTU7	Glutathione S-transferase U7	3054421	3056407
qSYM-c02-1	Gh_A02G0248	NA	NA	3059402	3059581
qSYM-c02-1	Gh_A02G0249	RPN2B	26S proteasome non-ATPase regulatory subunit 1 homolog B	3060333	3061007
qSYM-c02-1	Gh_A02G0250	NA	NA	3062103	3064102
qSYM-c02-1	Gh_A02G0251	NA	NA	3070173	3072260
qSYM-c02-1	Gh_A02G0252	NA	NA	3085753	3086841
qSYM-c02-1	Gh_A02G0253	NA	NA	3087160	3088292
qSYM-c02-1	Gh_A02G0254	NA	NA	3097849	3099123
qSYM-c02-1	Gh_A02G0255	RPL13AD	60S ribosomal protein L13a-4	3103145	3104003
qSYM-c02-1	Gh_A02G0256	NA	NA	3105959	3108052
qSYM-c02-1	Gh_A02G0257	NA	NA	3116354	3118408
qSYM-c02-1	Gh_A02G0258	GSTU7	Glutathione S-transferase U7	3119443	3120893
qSYM-c02-1	Gh_A02G0259	GSTU7	Glutathione S-transferase U7	3123568	3124552
qSYM-c02-1	Gh_A02G0260	NA	Glutathione transferase GST 23	3129950	3154794
qSYM-c02-1	Gh_A02G0261	NA	Probable glutathione S-transferase	3158934	3165014
qSYM-c02-1	Gh_A02G0262	NA	Glutathione transferase GST 23	3167292	3171181
qSYM-c02-1	Gh_A02G0263	NA	Glutathione transferase GST 23	3173212	3174187
qSYM-c02-1	Gh_A02G0264	NA	Non-specific lipid-transfer protein 1	3177157	3177498
qSYM-c02-1	Gh_A02G0265	ING1	PHD finger protein ING1	3181925	3184093
qSYM-c02-1	Gh_A02G0266	GLCAT14A	Beta-glucuronosyltransferase GlcAT14A	3186629	3189759
qSYM-c02-1	Gh_A02G0267	At4g13590	GDT1-like protein 2, chloroplastic	3190610	3194195
qSYM-c02-1	Gh_A02G0268	At1g65750	Putative ribonuclease H protein At1g65750	3217227	3218558
qSYM-c02-1	Gh_A02G0269	NA	NA	3237358	3238092
qSYM-c02-1	Gh_A02G0270	At5g63930	Probable leucine-rich repeat receptor-like protein kinase At5g63930	3241669	3243389
qSYM-c02-1	Gh_A02G0271	NA	Retrovirus-related Pol polyprotein from transposon TNT 1-94	3244006	3245424
qSYM-c02-1	Gh_A02G0272	At2g33170	Probable leucine-rich repeat receptor-like protein kinase At2g33170	3245923	3247482
qSYM-c02-1	Gh_A02G0273	At1g65660	Pre-mRNA-splicing factor SLU7-A	3281191	3285724
qSYM-c02-1	Gh_A02G0274	NA	NA	3293160	3295253
qSYM-c02-1	Gh_A02G0275	NA	NA	3302407	3304494
qSYM-c02-1	Gh_A02G0276	NA	Endo-1,3	3315019	3320590
qSYM-c02-1	Gh_A02G0277	NA	Endo-1,3	3323251	3328014
qSYM-c02-1	Gh_A02G0278	RNR2A	Ribonucleoside-diphosphate reductase small chain A	3343079	3347935
qSYM-c02-1	Gh_A02G0279	MED33A	Mediator of RNA polymerase II transcription subunit 33A	3354498	3364852
qSYM-c02-1	Gh_A02G0280	SERINC3	Serine incorporator 3	3367513	3371774
qSYM-c02-1	Gh_A02G0281	CBSDUF1	DUF21 domain-containing protein At4g14240	3384410	3388889
qSYM-c02-1	Gh_A02G0282	GRP10	Glycine-rich RNA-binding protein 10	3391390	3392916
qSYM-c02-1	Gh_A02G0283	TSJT1	Stem-specific protein TSJT1	3394506	3401312
qSYM-c02-1	Gh_A02G0284	NFYC9	Nuclear transcription factor Y subunit C-9	3408057	3408833
qSYM-c02-1	Gh_A02G0285	VIT_05s0020g02800	ATP-dependent (S)-NAD(P)H-hydrate dehydratase	3409513	3412799
qSYM-c02-1	Gh_A02G0286	TBL11	Protein trichome birefringence-like 11	3420020	3423092
qSYM-c02-1	Gh_A02G0287	At3g06035	Uncharacterized GPI-anchored protein At3g06035	3428496	3430463
qSYM-c02-1	Gh_A02G0288	PNC1	Peroxisomal adenine nucleotide carrier 1	3431620	3433792
qSYM-c02-1	Gh_A02G0289	KAPP	Protein phosphatase 2C 70	3437184	3444569
qSYM-c02-1	Gh_A02G0290	ARIA	ARM REPEAT PROTEIN INTERACTING WITH ABF2	3446361	3452479
qSYM-c02-1	Gh_A02G0291	KMS1	Vacuole membrane protein KMS1	3478718	3482991
qSYM-c02-1	Gh_A02G0292	slr0305	TVP38/TMEM64 family membrane protein slr0305	3489089	3497817
qSYM-c02-1	Gh_A02G0293	NA	NA	3500895	3501344
qSYM-c02-1	Gh_A02G0294	LOX5	Linoleate 9S-lipoxygenase 5, chloroplastic	3523655	3527420
qSYM-c02-1	Gh_A02G0295	psaD	Photosystem I reaction center subunit II, chloroplastic	3528362	3529357
qSYM-c02-1	Gh_A02G0296	NA	Primary amine oxidase	3529365	3534101
qSYM-c02-1	Gh_A02G0297	NA	Primary amine oxidase (Fragment)	3538710	3539516
qSYM-c02-1	Gh_A02G0298	NA	NA	3552125	3553685
qSYM-c02-1	Gh_A02G0299	NA	NA	3573121	3573733
qSYM-c02-1	Gh_A02G0300	WNK1	Serine/threonine-protein kinase WNK1	3580344	3583100
qSYM-c02-1	Gh_A02G0301	GT5	Anthocyanidin 3-O-glucosyltransferase 5	3591480	3592916
qSYM-c02-1	Gh_A02G0302	NA	NA	3594869	3597289
qSYM-c02-1	Gh_A02G0303	CALS12	Callose synthase 12	3607023	3612163
qSYM-c02-1	Gh_A02G0304	CALS12	Callose synthase 12	3681015	3683249
qSYM-c02-1	Gh_A02G0305	IDM1	Increased DNA methylation 1	3685892	3692739
qSYM-c02-1	Gh_A02G0306	FRL4A	FRIGIDA-like protein 4a	3693948	3696996
qSYM-c02-1	Gh_A02G0307	NA	NA	3698591	3699616
qSYM-c02-1	Gh_A02G0308	CALS12	Callose synthase 12	3700248	3704011
qSYM-c02-1	Gh_A02G0309	NA	Late embryogenesis abundant protein D-34	3711285	3712256
qSYM-c02-1	Gh_A02G0310	yakA	Probable serine/threonine-protein kinase yakA	3716984	3719317
qSYM-c02-1	Gh_A02G0311	NA	NA	3732958	3735328
qSYM-c02-1	Gh_A02G0312	NA	NA	3745422	3747912
qSYM-c02-1	Gh_A02G0313	PBD1	Proteasome subunit beta type-2-A	3752146	3754484
qSYM-c02-1	Gh_A02G0314	HSP22.7	22.7 kDa class IV heat shock protein	3789165	3789728
qSYM-c02-1	Gh_A02G0315	COR2	Non-functional NADPH-dependent codeinone reductase 2	3791509	3805072
qSYM-c02-1	Gh_A02G0316	YLS3	Protein YLS3	3805267	3806614
qSYM-c02-1	Gh_A02G0317	At2g13820	Non-specific lipid-transfer protein-like protein At2g13820	3812733	3814709
qSYM-c02-1	Gh_A02G0318	At2g13820	Non-specific lipid-transfer protein-like protein At2g13820	3816136	3816994
qSYM-c02-1	Gh_A02G0319	CDC73	Protein CDC73 homolog	3817946	3819669
qSYM-c02-1	Gh_A02G0320	p20	Uncharacterized N-acetyltransferase p20	3821288	3821848
qSYM-c02-1	Gh_A02G0321	p20	Uncharacterized N-acetyltransferase p20	3823663	3824223
qSYM-c02-1	Gh_A02G0322	HMT3	Homocysteine S-methyltransferase 3	3825650	3829330
qSYM-c02-1	Gh_A02G0323	STY8	Serine/threonine-protein kinase STY8	3837359	3839015
qSYM-c02-1	Gh_A02G0324	TCX2	Protein tesmin/TSO1-like CXC 2	3852336	3856489
qSYM-c02-1	Gh_A02G0325	NA	40S ribosomal protein S3a	3859074	3861014
qSYM-c02-1	Gh_A02G0326	NA	40S ribosomal protein S3a	3864249	3866223
qSYM-c02-1	Gh_A02G0327	NA	NA	3869884	3870940
qSYM-c02-1	Gh_A02G0328	VAB	VAN3-binding protein	3893237	3906846
qSYM-c02-1	Gh_A02G0329	VIT_05s0020g04080	1,2-dihydroxy-3-keto-5-methylthiopentene dioxygenase 2	3908586	3910742
qSYM-c02-1	Gh_A02G0330	PR	Perakine reductase	3911615	3915230
qSYM-c02-1	Gh_A02G0331	PR	Perakine reductase	3915597	3922552
qSYM-c02-1	Gh_A02G0332	NA	Meiotic recombination protein DMC1 homolog	3924561	3932482
qSYM-c02-1	Gh_A02G0333	APS1	ATP sulfurylase 1, chloroplastic	3955196	3957105
qSYM-c02-1	Gh_A02G0334	NA	NA	3960714	3965674
qSYM-c02-1	Gh_A02G0335	CML8	Calmodulin-like protein 8	3967277	3969372
qSYM-c02-1	Gh_A02G0336	NA	2-methyl-6-phytyl-1,4-hydroquinone methyltransferase, chloroplastic	3975675	3976993
qSYM-c02-1	Gh_A02G0337	NA	NA	3977546	3977740
qSYM-c02-1	Gh_A02G0338	NA	NA	3978156	3979116
qSYM-c02-1	Gh_A02G0339	CIPK7	CBL-interacting serine/threonine-protein kinase 7	4015866	4017254
qSYM-c02-1	Gh_A02G0340	AUX22B	Auxin-induced protein 22B	4024585	4025440
qSYM-c02-1	Gh_A02G0341	IAA14	Auxin-responsive protein IAA14	4043200	4044684
qSYM-c02-1	Gh_A02G0342	tatB	Sec-independent protein translocase protein TatB	4049103	4050907
qSYM-c02-1	Gh_A02G0343	BHLH92	Transcription factor bHLH92	4056763	4057616
qSYM-c02-1	Gh_A02G0344	RPS15	40S ribosomal protein S15	4058105	4059394
qSYM-c02-1	Gh_A02G0345	At2g34160	Uncharacterized protein At2g34160	4060146	4061559
qSYM-c02-1	Gh_A02G0346	At1g12300	Pentatricopeptide repeat-containing protein At1g12300, mitochondrial	4061961	4063892
qSYM-c02-1	Gh_A02G0347	CSLG2	Cellulose synthase-like protein G2	4155805	4157030
qSYM-c02-1	Gh_A02G0348	CSLG1	Cellulose synthase-like protein G1	4157040	4158574
qSYM-c02-1	Gh_A02G0349	At4g14490	FHA domain-containing protein At4g14490	4163056	4164048
qSYM-c02-1	Gh_A02G0350	NA	NA	4173767	4174841
qSYM-c02-1	Gh_A02G0351	SCD2	Coiled-coil domain-containing protein SCD2	4175226	4176080
qSYM-c02-1	Gh_A02G0352	At5g43560	MATH domain-containing protein At5g43560	4184181	4191971
qSYM-c02-1	Gh_A02G0353	NA	NA	4196077	4196373
qSYM-c02-1	Gh_A02G0354	NA	NA	4202921	4203208
qSYM-c02-1	Gh_A02G0355	PIR	Protein PIR	4288506	4288792
qSYM-c02-1	Gh_A02G0356	CSLG2	Cellulose synthase-like protein G2	4294795	4301358
qSYM-c02-1	Gh_A02G0357	SUP	Transcriptional regulator SUPERMAN	4305631	4306146
qSYM-c02-1	Gh_A02G0358	ETR2	Ethylene receptor 2	4358512	4361172
qSYM-c02-1	Gh_A02G0359	AHL20	AT-hook motif nuclear-localized protein 20	4385812	4386699
qSYM-c02-1	Gh_A02G0360	NA	NA	4393264	4395051
qSYM-c02-1	Gh_A02G0361	CUL4	Cullin-4	4416489	4417408
qSYM-c02-1	Gh_A02G0362	At4g14450	Uncharacterized protein At4g14450, chloroplastic	4420441	4420758
qSYM-c02-1	Gh_A02G0363	NA	NA	4432197	4434527
qSYM-c02-1	Gh_A02G0364	ECI3	Enoyl-CoA delta isomerase 3	4441174	4441848
qSYM-c02-1	Gh_A02G0365	ECI3	Enoyl-CoA delta isomerase 3	4444211	4444924
qSYM-c02-1	Gh_A02G0366	NA	NA	4445649	4447017
qSYM-c02-1	Gh_A02G0367	At1g06620	1-aminocyclopropane-1-carboxylate oxidase homolog 1	4448422	4449714
qSYM-c02-1	Gh_A02G0368	At1g06620	1-aminocyclopropane-1-carboxylate oxidase homolog 1	4450325	4488571
qSYM-c02-1	Gh_A02G0369	D4H	Deacetoxyvindoline 4-hydroxylase	4494580	4495308
qSYM-c02-1	Gh_A02G0370	ACO3	1-aminocyclopropane-1-carboxylate oxidase homolog	4499967	4500749
qSYM-c02-1	Gh_A02G0371	ACO3	1-aminocyclopropane-1-carboxylate oxidase homolog	4501537	4502037
qSYM-c02-1	Gh_A02G0372	At1g06620	1-aminocyclopropane-1-carboxylate oxidase homolog 1	4539849	4541148
qSYM-c02-1	Gh_A02G0373	At3g23200	CASP-like protein 5B3	4544345	4546348
qSYM-c02-1	Gh_A02G0374	At4g08300	WAT1-related protein At4g08300	4565167	4566743
qSYM-c02-1	Gh_A02G0375	ATL16	RING-H2 finger protein ATL16	4570203	4571156
qSYM-c02-1	Gh_A02G0376	ERF098	Ethylene-responsive transcription factor ERF098	4624927	4625372
qSYM-c02-1	Gh_A02G0377	ERF1B	Ethylene-responsive transcription factor 1B	4665508	4665777
qSYM-c02-1	Gh_A02G0378	PRP	Repetitive proline-rich cell wall protein	4707966	4708883
qSYM-c02-1	Gh_A02G0379	PRP	Repetitive proline-rich cell wall protein	4731153	4731932
qSYM-c02-1	Gh_A02G0380	PRP	Repetitive proline-rich cell wall protein	4748335	4749030
qSYM-c02-1	Gh_A02G0381	PRP	Repetitive proline-rich cell wall protein	4795916	4796848
qSYM-c02-1	Gh_A02G0382	PRP	Repetitive proline-rich cell wall protein	4826372	4826971
qSYM-c02-1	Gh_A02G0383	Os03g0268000	Serine/threonine-protein phosphatase PP1	4834069	4835387
qSYM-c02-1	Gh_A02G0384	CRY2	Cryptochrome-2	4840292	4843745
qSYM-c02-1	Gh_A02G0385	MEAF6	Chromatin modification-related protein MEAF6	4847317	4849182
qSYM-c02-1	Gh_A02G0386	MD1	Malate dehydrogenase	4867855	4870199
qSYM-c02-1	Gh_A02G0387	At1g65660	Pre-mRNA-splicing factor SLU7-A	4898946	4902637
qSYM-c02-1	Gh_A02G0388	LSH6	Protein LIGHT-DEPENDENT SHORT HYPOCOTYLS 6	4909542	4910192
qSYM-c02-1	Gh_A02G0389	At1g04430	Probable methyltransferase PMT8	4949979	4953777
qSYM-c02-1	Gh_A02G0390	trc	Serine/threonine-protein kinase tricorner	4974014	4977919
qSYM-c02-1	Gh_A02G0391	At4g26100	Casein kinase I isoform delta-like	4980237	4984157
qSYM-c02-1	Gh_A02G0392	NA	NA	5029105	5035538
qSYM-c02-1	Gh_A02G0393	RPL14B	60S ribosomal protein L14-2	5036373	5037809
qSYM-c02-1	Gh_A02G0394	GLTP1	Glycolipid transfer protein 1	5039237	5041984
qSYM-c02-1	Gh_A02G0395	ATK1	Kinesin-1	5042512	5045674
qSYM-c02-1	Gh_A02G0396	NA	NA	5060189	5062839
qSYM-c02-1	Gh_A02G0397	NA	NA	5080766	5083979
qSYM-c02-1	Gh_A02G0398	PHO1	Phosphate transporter PHO1	5085109	5093708
qSYM-c02-1	Gh_A02G0399	NA	NA	5144047	5144289
qSYM-c02-1	Gh_A02G0400	NA	NA	5220877	5221560
qSYM-c02-1	Gh_A02G0401	TTC7B	Tetratricopeptide repeat protein 7B	5229655	5232960
qSYM-c02-1	Gh_A02G0402	RPL28	50S ribosomal protein L28, chloroplastic	5233316	5234566
qSYM-c02-1	Gh_A02G0403	MORF2	Multiple organellar RNA editing factor 2, chloroplastic	5238420	5240611
qSYM-c02-1	Gh_A02G0404	CYN	Cyanate hydratase	5242153	5243446
qSYM-c02-1	Gh_A02G0405	NA	NA	5244404	5244646
qSYM-c02-1	Gh_A02G0406	NPF5.2	Protein NRT1/ PTR FAMILY 5.2	5259356	5264560
qSYM-c02-1	Gh_A02G0407	NA	NA	5264890	5268537
qSYM-c02-1	Gh_A02G0408	RNP1	Heterogeneous nuclear ribonucleoprotein 1	5271268	5273043
qSYM-c02-1	Gh_A02G0409	ufaA1	Tuberculostearic acid methyltransferase UfaA1	5276011	5289969
qSYM-c02-1	Gh_A02G0410	ufaA1	Tuberculostearic acid methyltransferase UfaA1	5303399	5316674
qSYM-c02-1	Gh_A02G0411	RNP1	Heterogeneous nuclear ribonucleoprotein 1	5318754	5320566
qSYM-c02-1	Gh_A02G0412	NA	NA	5325128	5326516
qSYM-c02-1	Gh_A02G0413	NA	Eukaryotic translation initiation factor isoform 4E-2	5332140	5333836
qSYM-c02-1	Gh_A02G0414	RPL23A	60S ribosomal protein L23	5345023	5347039
qSYM-c02-1	Gh_A02G0415	NA	NA	5352051	5354023
qSYM-c02-1	Gh_A02G0416	COL5	Zinc finger protein CONSTANS-LIKE 5	5365575	5368310
qSYM-c02-1	Gh_A02G0417	PRP19A	Pre-mRNA-processing factor 19 homolog 1	5375225	5380402
qSYM-c02-1	Gh_A02G0418	oxr1	Oxidation resistance protein 1	5381024	5384024
qSYM-c02-1	Gh_A02G0419	PCMP-H87	Pentatricopeptide repeat-containing protein At3g24000, mitochondrial	5392529	5394262
qSYM-c02-1	Gh_A02G0420	NA	NA	5395019	5396619
qSYM-c02-1	Gh_A02G0421	NA	29 kDa ribonucleoprotein A, chloroplastic	5401390	5403217
qSYM-c02-1	Gh_A02G0422	nxt3	Putative G3BP-like protein	5405920	5408995
qSYM-c02-1	Gh_A02G0423	SRC2	Protein SRC2 homolog	5410722	5411936
qSYM-c02-1	Gh_A02G0424	NA	NA	5430080	5430811
qSYM-c02-1	Gh_A02G0425	NA	NA	5515467	5517471
qSYM-c02-1	Gh_A02G0426	Bnip1	Vesicle transport protein SEC20	5519383	5521526
qSYM-c02-1	Gh_A02G0427	FLS	Flavonol synthase/flavanone 3-hydroxylase	5581833	5582471
qSYM-c02-1	Gh_A02G0428	At4g08850	Probable LRR receptor-like serine/threonine-protein kinase At4g08850	5782212	5783732
qSYM-c02-1	Gh_A02G0429	At4g08850	Probable LRR receptor-like serine/threonine-protein kinase At4g08850	5783765	5784103
qSYM-c02-1	Gh_A02G0430	MYB305	Myb-related protein 305	5810934	5811946
qSYM-c02-1	Gh_A02G0431	PCMP-H43	Pentatricopeptide repeat-containing protein At3g12770	5819282	5821195
qSYM-c02-1	Gh_A02G0432	At2g33280	Probable folate-biopterin transporter 9, chloroplastic	5821949	5822548
qSYM-c02-1	Gh_A02G0433	At2g33280	Probable folate-biopterin transporter 9, chloroplastic	5822714	5824111
qSYM-c02-1	Gh_A02G0434	AMT1-1	Ammonium transporter 1 member 1	5846905	5848362
qSYM-c02-1	Gh_A02G0435	SLAH3	S-type anion channel SLAH3	5935816	5939915
qSYM-c02-1	Gh_A02G0436	SMAP1	Small acidic protein 1	5969430	5969612
qSYM-c02-1	Gh_A02G0437	At4g15470	BI1-like protein	5970634	5972682
qSYM-c02-1	Gh_A02G0438	bsdc1	BSD domain-containing protein 1	5973512	5974639
qSYM-c02-1	Gh_A02G0439	SAMDC4	S-adenosylmethionine decarboxylase proenzyme 4	5992654	5994601
qSYM-c02-1	Gh_A02G0440	At3g06270	Probable protein phosphatase 2C 35	6021130	6023825
qSYM-c02-1	Gh_A02G0441	At3g24850	Putative B3 domain-containing protein At3g24850	6031633	6032358
qSYM-c02-1	Gh_A02G0442	RF298	Putative E3 ubiquitin-protein ligase RF298	6036964	6040198
qSYM-c02-1	Gh_A02G0443	At4g15545	Uncharacterized protein At4g15545	6049564	6052769
qSYM-c02-1	Gh_A02G0444	rihA	Pyrimidine-specific ribonucleoside hydrolase RihA	6052997	6057575
qSYM-c02-1	Gh_A02G0445	At5g18840	Sugar transporter ERD6-like 16	6064238	6067605
qSYM-c02-1	Gh_A02G0446	SPL7	Squamosa promoter-binding-like protein 7	6083847	6090521
qSYM-c02-1	Gh_A02G0447	NA	NA	6096718	6097083
qSYM-c02-1	Gh_A02G0448	NA	NA	6103057	6104124
qSYM-c02-1	Gh_A02G0449	PAXIP1	PAX-interacting protein 1	6105563	6110371
qSYM-c02-1	Gh_A02G0450	Dnajb12	DnaJ homolog subfamily B member 12	6123020	6125818
qSYM-c02-1	Gh_A02G0451	RUK	Serine/threonine-protein kinase RUNKEL	6132920	6138808
qSYM-c02-1	Gh_A02G0452	NHX2	Sodium/hydrogen exchanger 2	6141754	6146258
qSYM-c02-1	Gh_A02G0453	TULP6	Tubby-like F-box protein 6	6186393	6188186
qSYM-c02-1	Gh_A02G0454	BAM9	Inactive beta-amylase 9	6188440	6191735
qSYM-c02-1	Gh_A02G0455	POPTRDRAFT_820933	CASP-like protein 1D1	6232663	6234972
qSYM-c02-1	Gh_A02G0456	NA	CASP-like protein 1E1	6263319	6265419
qSYM-c02-1	Gh_A02G0457	MIEL1	E3 ubiquitin-protein ligase MIEL1	6266130	6268142
qSYM-c02-1	Gh_A02G0458	NA	Lipase	6273272	6276461
qSYM-c02-1	Gh_A02G0459	NA	NA	6356646	6357299
qSYM-c02-1	Gh_A02G0460	At3g06400	Putative chromatin-remodeling complex ATPase chain	6519637	6525769
qSYM-c02-1	Gh_A02G0461	GRXS10	Monothiol glutaredoxin-S10	6532389	6532697
qSYM-c02-1	Gh_A02G0462	GRXS2	Monothiol glutaredoxin-S2	6609041	6609349
qSYM-c02-1	Gh_A02G0463	ERF086	Ethylene-responsive transcription factor ERF086	6623871	6624824
qSYM-c02-1	Gh_A02G0464	At2g47850	Zinc finger CCCH domain-containing protein 32	6627002	6630109
qSYM-c02-1	Gh_A02G0465	ALY3	Protein ALWAYS EARLY 3	6691111	6700230
qSYM-c02-1	Gh_A02G0466	NA	NA	6712517	6713692
qSYM-c02-1	Gh_A02G0467	NA	NA	6716319	6717509
qSYM-c02-1	Gh_A02G0468	NA	NA	6719088	6720550
qSYM-c02-1	Gh_A02G0469	At3g25182	B3 domain-containing protein At3g25182	6721880	6722605
qSYM-c02-1	Gh_A02G0470	SNF4	Sucrose nonfermenting 4-like protein	6726436	6731088
qSYM-c02-1	Gh_A02G0471	MORC4	MORC family CW-type zinc finger protein 4	6744559	6752629
qSYM-c02-1	Gh_A02G0472	CUL1	Cullin-1	6753204	6754631
qSYM-c02-1	Gh_A02G0473	NFYB5	Nuclear transcription factor Y subunit B-5	6808957	6809415
qSYM-c02-1	Gh_A02G0474	NA	NA	6828897	6830554
qSYM-c02-1	Gh_A02G0475	SLC25A19	Mitochondrial thiamine pyrophosphate carrier	6831136	6834191
qSYM-c02-1	Gh_A02G0476	FPF1	Flowering-promoting factor 1	6854439	6854621
qSYM-c02-1	Gh_A02G0477	RALFL33	Protein RALF-like 33	6988277	6988657
qSYM-c02-1	Gh_A02G0478	NA	NA	6991456	6993483
qSYM-c02-1	Gh_A02G0479	XXT1	Xyloglucan 6-xylosyltransferase 1	7000172	7001518
qSYM-c02-1	Gh_A02G0480	Fam179b	Protein FAM179B	7002050	7003299
qSYM-c02-1	Gh_A02G0481	GMCL1	Germ cell-less protein-like 1	7006893	7011496
qSYM-c02-1	Gh_A02G0482	TCTP	Translationally-controlled tumor protein homolog	7013497	7015038
qSYM-c02-1	Gh_A02G0483	ATJ49	Chaperone protein dnaJ 49	7024347	7025405
qSYM-c02-1	Gh_A02G0484	PRL1	Protein pleiotropic regulatory locus 1	7027999	7033076
qSYM-c02-1	Gh_A02G0485	UXS2	UDP-glucuronic acid decarboxylase 2	7035361	7037669
qSYM-c02-1	Gh_A02G0486	dlc-1	Dynein light chain 1, cytoplasmic	7094305	7096252
qSYM-c02-1	Gh_A02G0487	DTX55	Protein DETOXIFICATION 55	7159708	7161308
qSYM-c02-1	Gh_A02G0488	GEX2	Protein GAMETE EXPRESSED 2	7212746	7217742
qSYM-c02-1	Gh_A02G0489	NA	NA	7222730	7223294
qSYM-c02-1	Gh_A02G0490	CAPH2	Condensin-2 complex subunit H2	7225835	7229439
qSYM-c02-1	Gh_A02G0491	IBR3	Probable acyl-CoA dehydrogenase IBR3	7244667	7250386
qSYM-c02-1	Gh_A02G0492	PGA3	Exopolygalacturonase clone GBGE184	7266444	7268214
qSYM-c02-1	Gh_A02G0493	RPL19B	60S ribosomal protein L19-2	7270642	7272195
qSYM-c02-1	Gh_A02G0494	PLDZETA1	Phospholipase D zeta 1	7274495	7288655
qSYM-c02-1	Gh_A02G0495	At3g05640	Probable protein phosphatase 2C 34	7292521	7294588
qSYM-c02-1	Gh_A02G0496	HIPP26	Heavy metal-associated isoprenylated plant protein 26	7310370	7311471
qSYM-c02-1	Gh_A02G0497	Adam	Eukaryotic translation initiation factor 3 subunit J	7313234	7316635
qSYM-c02-1	Gh_A02G0498	NA	Major allergen Pru ar 1	7321494	7322042
qSYM-c02-1	Gh_A02G0499	PRUA1	Major allergen Pru av 1	7323602	7324186
qSYM-c02-1	Gh_A02G0500	NA	Major allergen Pru ar 1	7335815	7336411
qSYM-c02-1	Gh_A02G0501	NA	NA	7336885	7337037
qSYM-c02-1	Gh_A02G0502	PRUA1	Major allergen Pru av 1	7338057	7343729
qSYM-c02-1	Gh_A02G0503	NA	Major allergen Pru ar 1	7353822	7354397
qSYM-c02-1	Gh_A02G0504	PRUA1	Major allergen Pru av 1	7357979	7358432
qSYM-c02-1	Gh_A02G0505	NA	Major allergen Pru ar 1	7360494	7361081
qSYM-c02-1	Gh_A02G0506	NA	UDP-glucose 4-epimerase GEPI42	7363380	7365467
qSYM-c02-1	Gh_A02G0507	NA	Major allergen Pru ar 1	7432080	7432646
qSYM-c02-1	Gh_A02G0508	NA	Major allergen Pru ar 1	7444828	7445403
qSYM-c02-1	Gh_A02G0509	NA	Major allergen Pru ar 1	7491990	7492564
qSYM-c02-1	Gh_A02G0510	NA	Major allergen Pru ar 1	7500774	7501796
qSYM-c02-1	Gh_A02G0511	NA	Major allergen Pru ar 1	7503259	7503852
qSYM-c02-1	Gh_A02G0512	DI19-4	Protein DEHYDRATION-INDUCED 19 homolog 4	7562657	7564455
qSYM-c02-1	Gh_A02G0513	COBL7	COBRA-like protein 7	7572905	7575380
qSYM-c02-1	Gh_A02G0514	GATA15	GATA transcription factor 15	7592774	7593416
qSYM-c02-1	Gh_A02G0515	IMPA1	Importin subunit alpha-1	7627643	7630113
qSYM-c02-1	Gh_A02G0516	AAE7	Acetate/butyrate--CoA ligase AAE7, peroxisomal	7662166	7664032
qSYM-c02-1	Gh_A02G0517	AAE7	Acetate/butyrate--CoA ligase AAE7, peroxisomal	7668368	7749288
qSYM-c02-1	Gh_A02G0518	CMTA5	Calmodulin-binding transcription activator 5	7782421	7787117
qSYM-c02-1	Gh_A02G0519	SAR1A	GTP-binding protein SAR1A	7788413	7790080
qSYM-c02-1	Gh_A02G0520	RPL29B	60S ribosomal protein L29-2	7798652	7798939
qSYM-c02-1	Gh_A02G0521	smek1	Serine/threonine-protein phosphatase 4 regulatory subunit 3	7804648	7813573
qSYM-c02-1	Gh_A02G0522	NA	NA	7816930	7817328
qSYM-c02-1	Gh_A02G0523	RGL2	DELLA protein RGL2	7820074	7821891
qSYM-c02-1	Gh_A02G0524	NA	NA	7824320	7826323
qSYM-c02-1	Gh_A02G0525	PMEI	Pectinesterase inhibitor	7846407	7847006
qSYM-c02-1	Gh_A02G0526	NA	NA	7866775	7867893
qSYM-c02-1	Gh_A02G0527	ALDH22A1	Aldehyde dehydrogenase 22A1	7884791	7889318
qSYM-c02-1	Gh_A02G0528	CYP21-4	Peptidyl-prolyl cis-trans isomerase CYP21-4	7889890	7892553
qSYM-c02-1	Gh_A02G0529	At2g23060	Probable N-acetyltransferase HLS1-like	7943658	7945445
qSYM-c02-1	Gh_A02G0530	SUC2	Sucrose transport protein SUC2	7947539	7952892
qSYM-c02-1	Gh_A02G0531	ANX2	Receptor-like protein kinase ANXUR2	7959131	7961671
qSYM-c02-1	Gh_A02G0532	RNF181	E3 ubiquitin-protein ligase RNF181	7975033	7975653
qSYM-c02-1	Gh_A02G0533	EDR1	Serine/threonine-protein kinase EDR1	7981499	8016690
qSYM-c02-1	Gh_A02G0534	Hypk	Huntingtin-interacting protein K	8017318	8019096
qSYM-c02-1	Gh_A02G0535	At3g17090	Probable protein phosphatase 2C 42	8043251	8045338
qSYM-c02-1	Gh_A02G0536	NA	NA	8049502	8049846
qSYM-c02-1	Gh_A02G0537	NA	NA	8069938	8071064
qSYM-c02-1	Gh_A02G0538	BHLH148	Transcription factor bHLH148	8084552	8085214
qSYM-c02-1	Gh_A02G0539	NA	NA	8112485	8113024
qSYM-c02-1	Gh_A02G0540	NA	NA	8114045	8114413
qSYM-c02-1	Gh_A02G0541	WRKY48	Probable WRKY transcription factor 48	8125377	8126737
qSYM-c02-1	Gh_A02G0542	PER40	Peroxidase 40	8131024	8132267
qSYM-c02-1	Gh_A02G0543	WEX	Werner Syndrome-like exonuclease	8134355	8135002
qSYM-c02-1	Gh_A02G0544	NA	NA	8150263	8150586
qSYM-c02-1	Gh_A02G0545	PAPS3	Nuclear poly(A) polymerase 3	8150936	8155027
qSYM-c02-1	Gh_A02G0546	YPTV3	GTP-binding protein yptV3	8157704	8159825
qSYM-c02-1	Gh_A02G0547	emc6	ER membrane protein complex subunit 6	8161540	8161980
qSYM-c02-1	Gh_A02G0548	NA	NA	8169307	8169807
qSYM-c02-1	Gh_A02G0549	MYB108	Transcription factor MYB108	8177317	8178952
qSYM-c02-1	Gh_A02G0550	Nemf	Nuclear export mediator factor Nemf	8272714	8278067
qSYM-c02-1	Gh_A02G0551	RPS1	30S ribosomal protein S1, chloroplastic	8278747	8281004
qSYM-c02-1	Gh_A02G0552	CFDP1	Craniofacial development protein 1	8282890	8284804
qSYM-c02-1	Gh_A02G0553	LPD1	Dihydrolipoyl dehydrogenase 1, mitochondrial	8286571	8288745
qSYM-c02-1	Gh_A02G0554	At1g48040	Probable protein phosphatase 2C 13	8289980	8291582
qSYM-c02-1	Gh_A02G0555	B3GALT16	Probable beta-1,3-galactosyltransferase 16	8296440	8300026
qSYM-c02-1	Gh_A02G0556	vps13A	Putative vacuolar protein sorting-associated protein 13A	8317225	8384401
qSYM-c02-1	Gh_A02G0557	NA	NA	8406806	8408730
qSYM-c02-1	Gh_A02G0558	At1g48100	Polygalacturonase At1g48100	8475564	8480577
qSYM-c02-1	Gh_A02G0559	NA	Retrovirus-related Pol polyprotein from transposon TNT 1-94	8482343	8483920
qSYM-c02-1	Gh_A02G0560	HSP17.5-M	17.5 kDa class I heat shock protein	8484609	8485070
qSYM-c02-1	Gh_A02G0561	NA	NA	8498839	8500618
qSYM-c02-1	Gh_A02G0562	BOR1	Boron transporter 1	8507428	8511272
qSYM-c02-1	Gh_A02G0563	NA	NA	8515724	8516970
qSYM-c02-1	Gh_A02G0564	NA	NA	8517206	8519970
qSYM-c02-1	Gh_A02G0565	NA	NA	8549661	8550754
qSYM-c02-1	Gh_A02G0566	DRM2	DNA (cytosine-5)-methyltransferase DRM2	8572916	8577487
qSYM-c02-1	Gh_A02G0567	Ythdf2	YTH domain-containing family protein 2	8580874	8583505
qSYM-c02-1	Gh_A02G0568	RH40	DEAD-box ATP-dependent RNA helicase 40	8683803	8689534
qSYM-c02-1	Gh_A02G0569	NA	NA	8776176	8776737
qSYM-c02-1	Gh_A02G0570	PRMT1	Probable protein arginine N-methyltransferase 1	8778126	8781819
qSYM-c02-1	Gh_A02G0571	TIC32	Short-chain dehydrogenase TIC 32, chloroplastic	8787061	8789998
qSYM-c02-1	Gh_A02G0572	SAD2	Importin beta-like SAD2	8810244	8817494
qSYM-c02-1	Gh_A02G0573	METTL13	Methyltransferase-like protein 13	8835139	8837501
qSYM-c02-1	Gh_A02G0574	UBP12	Ubiquitin carboxyl-terminal hydrolase 12	8839053	8840697
qSYM-c02-1	Gh_A02G0575	ATG8I	Autophagy-related protein 8i	8840996	8842178
qSYM-c02-1	Gh_A02G0576	NA	NA	8843546	8843713
qSYM-c02-1	Gh_A02G0577	NA	NA	8848261	8848434
qSYM-c02-1	Gh_A02G0578	SAMS	S-adenosylmethionine synthase	8868384	8869565
qSYM-c02-1	Gh_A02G0579	SPL1	Squamosa promoter-binding-like protein 1	8879277	8892913
qSYM-c02-1	Gh_A02G0580	PTI1	Pto-interacting protein 1	8904293	8908339
qSYM-c02-1	Gh_A02G0581	At5g18500	Probable receptor-like protein kinase At5g18500	8909406	8911670
qSYM-c02-1	Gh_A02G0582	POLR3F	DNA-directed RNA polymerase III subunit RPC6	8916547	8917239
qSYM-c02-1	Gh_A02G0583	NPSN13	Novel plant SNARE 13	8920420	8923115
qSYM-c02-1	Gh_A02G0584	fcf2	rRNA-processing protein fcf2	8935599	8937586
qSYM-c02-1	Gh_A02G0585	NA	Retrovirus-related Pol polyprotein from transposon TNT 1-94	8995308	8996570
qSYM-c02-1	Gh_A02G0586	At5g52605	Putative defensin-like protein 20	8997309	8997859
qSYM-c02-1	Gh_A02G0587	NA	NA	9090990	9091337
qSYM-c02-1	Gh_A02G0588	NA	NA	9178560	9180070
qSYM-c02-1	Gh_A02G0589	RPL3B	50S ribosomal protein L3-2, chloroplastic	9181299	9184224
qSYM-c02-1	Gh_A02G0590	NA	Late embryogenesis abundant protein D-29	9237311	9238369
qSYM-c02-1	Gh_A02G0591	truA1	tRNA pseudouridine synthase A 1	9254580	9257228
qSYM-c02-1	Gh_A02G0592	GCR1	G-protein coupled receptor 1	9257808	9261547
qSYM-c02-1	Gh_A02G0593	NA	NA	9263353	9263591
qSYM-c02-1	Gh_A02G0594	nt5c2	Cytosolic purine 5'-nucleotidase	9277938	9283598
qSYM-c02-1	Gh_A02G0595	CHUP1	Protein CHUP1, chloroplastic	9289968	9293188
qSYM-c02-1	Gh_A02G0596	UGT71A15	UDP-glycosyltransferase 71A15	9293683	9297254
qSYM-c02-1	Gh_A02G0597	UGT71A15	UDP-glycosyltransferase 71A15	9297798	9298187
qSYM-c02-1	Gh_A02G0598	GT6	Anthocyanidin 3-O-glucosyltransferase 6 (Fragment)	9349447	9350109
qSYM-c02-1	Gh_A02G0599	GT3	Putative UDP-glucose flavonoid 3-O-glucosyltransferase 3	9350138	9350848
qSYM-c02-1	Gh_A02G0600	AtMg00860	Uncharacterized mitochondrial protein AtMg00860	9366531	9368222
qSYM-c02-1	Gh_A02G0601	Os05g0567100	Aspartic proteinase oryzasin-1	9383862	9386618
qSYM-c02-1	Gh_A02G0602	RAP	Aspartic proteinase	9389239	9392309
qSYM-c02-1	Gh_A02G0603	DHNAT1	1,4-dihydroxy-2-naphthoyl-CoA thioesterase 1	9393400	9394869
qSYM-c02-1	Gh_A02G0604	NA	NA	9399933	9400667
qSYM-c02-1	Gh_A02G0605	NA	NA	9422527	9422781
qSYM-c02-1	Gh_A02G0606	At1g04910	Uncharacterized protein At1g04910	9454352	9463687
qSYM-c02-1	Gh_A02G0607	NA	NA	9469572	9470412
qSYM-c02-1	Gh_A02G0608	XDH	Xanthine dehydrogenase	9483472	9486641
qSYM-c02-1	Gh_A02G0609	CPK11	Calcium-dependent protein kinase 11	9500456	9503183
qSYM-c02-1	Gh_A02G0610	At4g09580	Uncharacterized membrane protein At4g09580	9504333	9507333
qSYM-c02-1	Gh_A02G0611	NA	NA	9546260	9546577
qSYM-c02-1	Gh_A02G0612	SN2	Snakin-2	9547001	9547395
qSYM-c02-1	Gh_A02G0613	NA	NA	9554143	9556384
qSYM-c02-1	Gh_A02G0614	NA	NA	9613414	9619452
qSYM-c02-1	Gh_A02G0615	MLO1	MLO-like protein 1	9622731	9625473
qSYM-c02-1	Gh_A02G0616	NA	NA	9638432	9641468
qSYM-c02-1	Gh_A02G0617	STOP1	Protein SENSITIVE TO PROTON RHIZOTOXICITY 1	9670457	9671932
qSYM-c02-1	Gh_A02G0618	NA	NA	9704627	9705133
qSYM-c02-1	Gh_A02G0619	NA	NA	9718154	9718807
qSYM-c02-1	Gh_A02G0620	RGL2	DELLA protein RGL2	9741099	9742469
qSYM-c02-1	Gh_A02G0621	NA	NA	9750398	9751411
qSYM-c02-1	Gh_A02G0622	NA	NA	9754746	9755858
qSYM-c02-1	Gh_A02G0623	At1g65750	Putative ribonuclease H protein At1g65750	9770713	9771090
qSYM-c02-1	Gh_A02G0624	EMB8	Embryogenesis-associated protein EMB8	9773407	9780345
qSYM-c02-1	Gh_A02G0625	KAS2	3-oxoacyl-[acyl-carrier-protein] synthase II, chloroplastic	9891490	9892217
qSYM-c02-1	Gh_A02G0626	SUC2	Sucrose transport protein SUC2	9893346	9895488
qSYM-c02-1	Gh_A02G0627	MED22B	Mediator of RNA polymerase II transcription subunit 22b	9921105	9923421
qSYM-c02-1	Gh_A02G0628	NA	NA	9923968	9929331
qSYM-c02-1	Gh_A02G0629	NA	NA	9973325	9978978
qSYM-c02-1	Gh_A02G0630	At1g34300	G-type lectin S-receptor-like serine/threonine-protein kinase At1g34300	9982665	9985220
qSYM-c02-1	Gh_A02G0631	ARAD1	Probable arabinosyltransferase ARAD1	10057865	10059893
qSYM-c02-1	Gh_A02G0632	NA	NA	10065676	10066323
qSYM-c02-1	Gh_A02G0633	EPF2	Protein EPIDERMAL PATTERNING FACTOR 2	10067419	10068373
qSYM-c02-1	Gh_A02G0634	NAC017	NAC domain-containing protein 17	10070348	10073252
qSYM-c02-1	Gh_A02G0635	PUS3	tRNA pseudouridine(38/39) synthase	10082999	10088869
qSYM-c02-1	Gh_A02G0636	PDCD4	Programmed cell death protein 4	10093837	10096438
qSYM-c02-1	Gh_A02G0637	NA	Ras-related protein Rab7	10101472	10107560
qSYM-c02-1	Gh_A02G0638	LAC21	Laccase-21	10108128	10110615
qSYM-c02-1	Gh_A02G0639	zgc:123335	UPF0544 protein C5orf45 homolog	10130195	10131556
qSYM-c02-1	Gh_A02G0640	zgc:123335	UPF0544 protein C5orf45 homolog	10132654	10134015
qSYM-c02-1	Gh_A02G0641	RPS1	30S ribosomal protein S1, chloroplastic	10135737	10139842
qSYM-c02-1	Gh_A02G0642	IP5P3	Type IV inositol polyphosphate 5-phosphatase 3	10155534	10161863
qSYM-c02-1	Gh_A02G0643	2001-08-01	AUGMIN subunit 1	10166167	10170927
qSYM-c02-1	Gh_A02G0644	NA	NA	10226330	10227301
qSYM-c02-1	Gh_A02G0645	GI	Protein GIGANTEA	10269934	10275898
qSYM-c02-1	Gh_A02G0646	NA	NA	10278445	10279365
qSYM-c02-1	Gh_A02G0647	RPS18A	40S ribosomal protein S18	10329680	10330968
qSYM-c02-1	Gh_A02G0648	NA	NA	10352338	10355919
qSYM-c02-1	Gh_A02G0649	BLUS1	Serine/threonine-protein kinase BLUS1	10365470	10366112
qSYM-c02-1	Gh_A02G0650	NA	NA	10383640	10385128
qSYM-c02-1	Gh_A02G0651	PER12	Peroxidase 12	10404884	10407370
qSYM-c02-1	Gh_A02G0652	NA	NA	10435428	10437110
qSYM-c02-1	Gh_A02G0653	NA	NA	10548828	10549094
qSYM-c02-1	Gh_A02G0654	PAT08	Protein S-acyltransferase 8	10559414	10562813
qSYM-c02-1	Gh_A02G0655	ERF114	Ethylene-responsive transcription factor ERF114	10573671	10574786
qSYM-c02-1	Gh_A02G0656	At1g43190	Polypyrimidine tract-binding protein homolog 3	10588628	10594830
qSYM-c02-1	Gh_A02G0657	RPL3	60S ribosomal protein L3	10620413	10622072
qSYM-c02-1	Gh_A02G0658	GBF4	G-box-binding factor 4	10643390	10646251
qSYM-c02-1	Gh_A02G0659	NA	NA	10653013	10655110
qSYM-c02-1	Gh_A02G0660	NA	NA	10688878	10690083
qSYM-c02-1	Gh_A02G0661	NA	NA	10727812	10728027
qSYM-c02-1	Gh_A02G0662	NA	NA	10737903	10739252
qSYM-c02-1	Gh_A02G0663	SEC5A	Exocyst complex component SEC5A	10741128	10751947
qSYM-c02-1	Gh_A02G0664	RPD1	Protein ROOT PRIMORDIUM DEFECTIVE 1	10762627	10763889
qSYM-c02-1	Gh_A02G0665	VIP1	Transcription factor VIP1	10794505	10797433
qSYM-c02-1	Gh_A02G0666	CYP707A3	Abscisic acid 8'-hydroxylase 3	10821848	10832170
qSYM-c02-1	Gh_A02G0667	STY17	Serine/threonine-protein kinase STY17	10859437	10874709
qSYM-c02-1	Gh_A02G0668	EXT3	Extensin-3	10965003	10965869
qSYM-c02-1	Gh_A02G0669	NA	Fructose-1,6-bisphosphatase, cytosolic	11071406	11074001
qSYM-c02-1	Gh_A02G0670	HERC1	Probable E3 ubiquitin-protein ligase HERC1	11163214	11169362
qSYM-c02-1	Gh_A02G0671	PUB29	U-box domain-containing protein 29	11172382	11173602
qSYM-c02-1	Gh_A02G0672	LECRKS6	L-type lectin-domain containing receptor kinase S.6	11191829	11193880
qSYM-c02-1	Gh_A02G0673	Z-ISO	15-cis-zeta-carotene isomerase, chloroplastic	11194239	11196712
qSYM-c02-1	Gh_A02G0674	DOF3.5	Dof zinc finger protein DOF3.5	11235714	11236499
qSYM-c02-1	Gh_A02G0675	NA	NA	11257001	11257405
qSYM-c02-1	Gh_A02G0676	NA	NA	11297443	11298021
qSYM-c02-1	Gh_A02G0677	RCH1	LRR receptor-like serine/threonine-protein kinase RCH1	11333566	11337030
qSYM-c02-1	Gh_A02G0678	SPAC57A10.07	Uncharacterized protein C57A10.07	11339802	11341428
qSYM-c02-1	Gh_A02G0679	NA	Pathogen-related protein	11343333	11344289
qSYM-c02-1	Gh_A02G0680	PCMP-E88	Pentatricopeptide repeat-containing protein At3g09040, mitochondrial	11399437	11402514
qSYM-c02-1	Gh_A02G0681	NA	NA	11425636	11426199
qSYM-c02-1	Gh_A02G0682	ADH1	Alcohol dehydrogenase class-P	11429152	11431422
qSYM-c02-1	Gh_A02G0683	COI1	Coronatine-insensitive protein 1	11441720	11442436
qSYM-c02-1	Gh_A02G0684	COI1	Coronatine-insensitive protein 1	11442483	11442978
qSYM-c02-1	Gh_A02G0685	COI1	Coronatine-insensitive protein 1	11444426	11444743
qSYM-c02-1	Gh_A02G0686	ADH1	Alcohol dehydrogenase 1	11447405	11461792
qSYM-c02-1	Gh_A02G0687	ADH	Alcohol dehydrogenase	11461799	11462504
qSYM-c02-1	Gh_A02G0688	ADH1	Alcohol dehydrogenase 1	11519567	11521466
qSYM-c02-1	Gh_A02G0689	ADH1	Alcohol dehydrogenase class-P	11577263	11579755
qSYM-c02-1	Gh_A02G0690	PIN6	Probable auxin efflux carrier component 6	11590641	11594394
qSYM-c02-1	Gh_A02G0691	At4g08350	Putative transcription elongation factor SPT5 homolog 1	11624244	11632178
qSYM-c02-1	Gh_A02G0692	F8H	Probable glucuronoxylan glucuronosyltransferase F8H	11660358	11664162
qSYM-c02-1	Gh_A02G0693	PPD4	PsbP domain-containing protein 4, chloroplastic	11666135	11668764
qSYM-c02-1	Gh_A02G0694	SWEET1	Bidirectional sugar transporter SWEET1	11719940	11721641
qSYM-c02-1	Gh_A02G0695	NA	NA	11722612	11723098
qSYM-c02-1	Gh_A02G0696	NA	NA	11724370	11724825
qSYM-c02-1	Gh_A02G0697	NA	NA	11742940	11743388
qSYM-c02-1	Gh_A02G0698	SEU	Transcriptional corepressor SEUSS	11843920	11848662
qSYM-c02-1	Gh_A02G0699	NA	Thioredoxin M-type, chloroplastic	11849135	11849879
qSYM-c02-1	Gh_A02G0700	YDA	Mitogen-activated protein kinase kinase kinase YODA	11881841	11884664
qSYM-c02-1	Gh_A02G0701	SBDS	Ribosome maturation protein SBDS	11886651	11888958
qSYM-c02-1	Gh_A02G0702	SDN5	Small RNA degrading nuclease 5	11889724	11894411
qSYM-c02-1	Gh_A02G0703	SCL1	Scarecrow-like protein 1	11894844	11896944
qSYM-c02-1	Gh_A02G0704	GSO1	LRR receptor-like serine/threonine-protein kinase GSO1	11908278	11911160
qSYM-c02-1	Gh_A02G0705	GSO1	LRR receptor-like serine/threonine-protein kinase GSO1	11960560	11963564
qSYM-c02-1	Gh_A02G0706	At1g77060	Carboxyvinyl-carboxyphosphonate phosphorylmutase, chloroplastic	11983837	11986024
qSYM-c02-1	Gh_A02G0707	NA	Basic blue protein	11987143	11987490
qSYM-c02-1	Gh_A02G0708	NA	NA	12046070	12047065
qSYM-c02-1	Gh_A02G0709	NA	NA	12054729	12054896
qSYM-c02-1	Gh_A02G0710	RABC1	Ras-related protein RABC1	12069410	12072275
qSYM-c02-1	Gh_A02G0711	At1g43900	Probable protein phosphatase 2C 11	12073764	12076938
qSYM-c02-1	Gh_A02G0712	RH29	Putative DEAD-box ATP-dependent RNA helicase 29	12079117	12084427
qSYM-c02-1	Gh_A02G0713	SKP2B	F-box protein SKP2B	12084971	12087855
qSYM-c02-1	Gh_A02G0714	ACR3	ACT domain-containing protein ACR3	12136674	12139017
qSYM-c02-1	Gh_A02G0715	PERK13	Proline-rich receptor-like protein kinase PERK13	12171673	12175398
qSYM-c02-1	Gh_A02G0716	NA	NA	12179967	12189114
qSYM-c02-1	Gh_A02G0717	At1g21400	2-oxoisovalerate dehydrogenase subunit alpha 1, mitochondrial	12194116	12201389
qSYM-c02-1	Gh_A02G0718	PCMP-E58	Pentatricopeptide repeat-containing protein At1g43980, mitochondrial	12203047	12204966
qSYM-c02-1	Gh_A02G0719	PCMP-E5	Putative pentatricopeptide repeat-containing protein At1g77010, mitochondrial	12206664	12208697
qSYM-c02-1	Gh_A02G0720	NA	NA	12209375	12210567
qSYM-c02-1	Gh_A02G0721	SGRL	Protein STAY-GREEN LIKE, chloroplastic	12235318	12237320
qSYM-c02-1	Gh_A02G0722	WAKL1	Wall-associated receptor kinase-like 1	12254768	12256096
qSYM-c02-1	Gh_A02G0723	WAK3	Wall-associated receptor kinase 3	12367285	12367638
qSYM-c02-1	Gh_A02G0724	WAK2	Wall-associated receptor kinase 2	12367666	12370820
qSYM-c02-1	Gh_A02G0725	At2g34300	Probable methyltransferase PMT25	12421771	12422814
qSYM-c02-1	Gh_A02G0726	At1g29470	Probable methyltransferase PMT24	12422857	12424943
qSYM-c02-1	Gh_A02G0727	WAK2	Wall-associated receptor kinase 2	12548252	12550898
qSYM-c02-1	Gh_A02G0728	WAK2	Wall-associated receptor kinase 2	12707245	12709638
qSYM-c02-1	Gh_A02G0729	WAK3	Wall-associated receptor kinase 3	12855486	12857817
qSYM-c02-1	Gh_A02G0730	At4g08455	BTB/POZ domain-containing protein At4g08455	12956340	12956780
qSYM-c02-1	Gh_A02G0731	At1g77260	Probable methyltransferase PMT10	12957379	12967333
qSYM-c02-1	Gh_A02G0732	CML44	Probable calcium-binding protein CML44	12973416	12974012
qSYM-c02-1	Gh_A02G0733	NA	NA	13047355	13048919
qSYM-c02-1	Gh_A02G0734	NA	NA	13071265	13072986
qSYM-c02-1	Gh_A02G0735	ASHH2	Histone-lysine N-methyltransferase ASHH2	13075957	13091357
qSYM-c02-1	Gh_A02G0736	PMADS2	Floral homeotic protein PMADS 2	13128453	13131418
qSYM-c02-1	Gh_A02G0737	NA	NA	13164773	13165096
qSYM-c02-1	Gh_A02G0738	NA	NA	13176226	13179626
qSYM-c02-1	Gh_A02G0739	NA	NA	13238541	13244557
qSYM-c02-1	Gh_A02G0740	At1g77330	1-aminocyclopropane-1-carboxylate oxidase 5	13401250	13402546
qSYM-c02-1	Gh_A02G0741	At1g77330	1-aminocyclopropane-1-carboxylate oxidase 5	13613080	13614165
qSYM-c02-1	Gh_A02G0742	mhkB	Myosin heavy chain kinase B	13653448	13657235
qSYM-c02-1	Gh_A02G0743	At1g11050	Probable receptor-like protein kinase At1g11050	13686893	13688740
qSYM-c02-1	Gh_A02G0744	tolB	Protein TolB	13708337	13710478
qSYM-c02-1	Gh_A02G0745	SWI3C	SWI/SNF complex subunit SWI3C	13711147	13717959
qSYM-c02-1	Gh_A02G0746	PPC1	Phosphoenolpyruvate carboxylase	13840387	13843027
qSYM-c02-1	Gh_A02G0747	PBC1	Proteasome subunit beta type-3-A	13845398	13848075
qSYM-c02-1	Gh_A02G0748	LARP1C	La-related protein 1C	13948371	13948910
qSYM-c02-1	Gh_A02G0749	NAC002	NAC domain-containing protein 2	13951657	13952900
qSYM-c02-1	Gh_A02G0750	ASP1	Aspartic proteinase Asp1	13971345	13977174
qSYM-c02-1	Gh_A02G0751	ALDH3H1	Aldehyde dehydrogenase family 3 member H1	14030633	14036873
qSYM-c02-1	Gh_A02G0752	NA	Protein disulfide-isomerase	14086175	14087112
qSYM-c02-1	Gh_A02G0753	At1g21780	BTB/POZ domain-containing protein At1g21780	14192630	14196136
qSYM-c02-1	Gh_A02G0754	CAO	Chlorophyllide a oxygenase, chloroplastic	14196235	14199400
qSYM-c02-1	Gh_A02G0755	NA	Esterase	14269173	14270872
qSYM-c02-1	Gh_A02G0756	NA	NA	14339399	14340181
qSYM-c02-1	Gh_A02G0757	NA	NA	14341459	14342892
qSYM-c02-1	Gh_A02G0758	UDP-GALT1	UDP-galactose transporter 1	14583876	14586329
qSYM-c02-1	Gh_A02G0759	NA	NA	14587614	14588976
qSYM-c02-1	Gh_A02G0760	At4g08300	WAT1-related protein At4g08300	14713583	14715535
qSYM-c02-1	Gh_A02G0761	prorsd1p	Prolyl-tRNA synthetase associated domain-containing protein 1	14846710	14853291
qSYM-c02-1	Gh_A02G0762	dapC	Probable N-succinyldiaminopimelate aminotransferase DapC	14854843	14856993
qSYM-c02-1	Gh_A02G0763	SELK	Selenoprotein K	14902132	14903721
qSYM-c02-1	Gh_A02G0764	At1g18250	Thaumatin-like protein	14906138	14907188
qSYM-c02-1	Gh_A02G0765	At1g77710	Ubiquitin-fold modifier 1	14926601	14929116
qSYM-c02-1	Gh_A02G0766	ASHR1	Histone-lysine N-methyltransferase ASHR1	14934105	14938843
qSYM-c02-1	Gh_A02G0767	ORP1C	Oxysterol-binding protein-related protein 1C	14969949	14970756
qSYM-c02-1	Gh_A02G0768	RPS13	30S ribosomal protein S13, chloroplastic	14978974	14979962
qSYM-c02-1	Gh_A02G0769	NA	Nitrate reductase [NADH]	14985035	14988239
qSYM-c02-1	Gh_A02G0770	MEKK1	Mitogen-activated protein kinase kinase kinase 1	15000122	15005535
qSYM-c02-1	Gh_A02G0771	NA	NA	15146099	15149057
qSYM-c02-1	Gh_A02G0772	tmem50	Transmembrane protein 50 homolog	15150727	15152036
qSYM-c02-1	Gh_A02G0773	SHM6	Serine hydroxymethyltransferase 6	15197900	15202281
qSYM-c02-1	Gh_A02G0774	NA	NA	15205191	15206485
qSYM-c02-1	Gh_A02G0775	TGA7	Transcription factor TGA7	15327097	15330358
qSYM-c02-1	Gh_A02G0776	NA	NA	15367625	15372116
qSYM-c02-1	Gh_A02G0777	NA	NA	15387005	15390195
qSYM-c02-1	Gh_A02G0778	NA	NA	15398165	15401066
qSYM-c02-1	Gh_A02G0779	NA	NA	15554279	15554656
qSYM-c02-1	Gh_A02G0780	AGL104	Agamous-like MADS-box protein AGL104	15645054	15648072
qSYM-c02-1	Gh_A02G0781	DFC	Protein DOWNSTREAM OF FLC	15686375	15687330
qSYM-c02-1	Gh_A02G0782	BXL7	Probable beta-D-xylosidase 7	15687835	15688541
qSYM-c02-1	Gh_A02G0783	RAP2-4	Ethylene-responsive transcription factor RAP2-4	15895805	15896698
qSYM-c02-1	Gh_A02G0784	echs1	Probable enoyl-CoA hydratase, mitochondrial	16061846	16064077
qSYM-c02-1	Gh_A02G0785	NA	NA	16188115	16188830
qSYM-c02-1	Gh_A02G0786	NA	NA	16246370	16251128
qSYM-c02-1	Gh_A02G0787	APRL4	5'-adenylylsulfate reductase-like 4	16269021	16271028
qSYM-c02-1	Gh_A02G0788	EXO	Protein EXORDIUM	16296150	16297202
qSYM-c02-1	Gh_A02G0789	SAPK2	Serine/threonine-protein kinase SAPK2	16299920	16301838
qSYM-c02-1	Gh_A02G0790	NA	NA	16309509	16309979
qSYM-c02-1	Gh_A02G0791	NA	NA	16326798	16329675
qSYM-c02-1	Gh_A02G0792	BHLH96	Transcription factor bHLH96	16373680	16374849
qSYM-c02-1	Gh_A02G0793	FIP1	GEM-like protein 1	16648884	16651093
qSYM-c02-1	Gh_A02G0794	NA	NA	16776913	16777611
qSYM-c02-1	Gh_A02G0795	GF14B	14-3-3-like protein B (Fragment)	16895933	16897628
qSYM-c02-1	Gh_A02G0796	ycf2-A	Protein Ycf2	16902706	16905584
qSYM-c02-1	Gh_A02G0797	NA	NA	16906131	16906466
qSYM-c02-1	Gh_A02G0798	ndhB2	NAD(P)H-quinone oxidoreductase subunit 2 B, chloroplastic	16907131	16907583
qSYM-c02-1	Gh_A02G0799	dnaJ1	Chaperone protein DnaJ 1	17057561	17059323
qSYM-c02-1	Gh_A02G0800	CIPK9	CBL-interacting serine/threonine-protein kinase 9	17090598	17091086
qSYM-c02-1	Gh_A02G0801	NA	NA	17331794	17340067
qSYM-c02-1	Gh_A02G0802	REN1	Rho GTPase-activating protein REN1	17423065	17466182
qSYM-c02-1	Gh_A02G0803	NA	NA	17514607	17516193
qSYM-c02-1	Gh_A02G0804	NA	NA	17744809	17746401
qSYM-c02-1	Gh_A02G0805	nep1	Aspartic proteinase nepenthesin-1	17766869	17768176
qSYM-c02-1	Gh_A02G0806	UBP16	Ubiquitin carboxyl-terminal hydrolase 16	18075623	18082648
qSYM-c02-1	Gh_A02G0807	AHL17	AT-hook motif nuclear-localized protein 17	18249743	18250651
qSYM-c02-1	Gh_A02G0808	NA	NA	18252143	18252537
qSYM-c02-1	Gh_A02G0809	NA	NA	18253098	18253388
qSYM-c02-1	Gh_A02G0810	trpt1	tRNA 2'-phosphotransferase 1	18253795	18254704
qSYM-c02-1	Gh_A02G0811	HLJ1	Protein HLJ1	18365243	18366265
qSYM-c02-1	Gh_A02G0812	BCHB	BEACH domain-containing protein B	18617762	18646059
qSYM-c02-1	Gh_A02G0813	GATA25	GATA transcription factor 25	18653345	18657689
qSYM-c02-1	Gh_A02G0814	SHM2	Serine hydroxymethyltransferase 2, mitochondrial	18661068	18665001
qSYM-c02-1	Gh_A02G0815	IRX9H	Probable beta-1,4-xylosyltransferase IRX9H	18669224	18671204
qSYM-c02-1	Gh_A02G0816	IKU2	Receptor-like protein kinase HAIKU2	18796243	18799242
qSYM-c02-1	Gh_A02G0817	HSL1	Receptor-like protein kinase HSL1	18889797	18892757
qSYM-c02-1	Gh_A02G0818	MGP	Zinc finger protein MAGPIE	18895545	18899151
qSYM-c02-1	Gh_A02G0819	NA	Tubulin alpha-1 chain	19038590	19040535
qSYM-c02-1	Gh_A02G0820	NA	NA	19093609	19094501
qSYM-c02-1	Gh_A02G0821	ROG1	Putative lipase ROG1	19095483	19099590
qSYM-c02-1	Gh_A02G0822	KN1	Homeotic protein knotted-1	19252970	19255038
qSYM-c02-1	Gh_A02G0823	HAT22	Homeobox-leucine zipper protein HAT22	19257447	19258386
qSYM-c02-1	Gh_A02G0824	BCAT2	Branched-chain-amino-acid aminotransferase 2, chloroplastic	19362147	19367099
qSYM-c02-1	Gh_A02G0825	NA	NA	19368796	19370613
qSYM-c02-1	Gh_A02G0826	Slc38a1	Sodium-coupled neutral amino acid transporter 1	19371750	19373843
qSYM-c02-1	Gh_A02G0827	GRF1	Growth-regulating factor 1	19707965	19710598
qSYM-c02-1	Gh_A02G0828	CENPE	Centromere-associated protein E	19877323	19881837
qSYM-c02-1	Gh_A02G0829	NA	NA	19890227	19890868
qSYM-c02-1	Gh_A02G0830	PPI1	Proton pump-interactor 1	20067369	20067710
qSYM-c02-1	Gh_A02G0831	NA	NA	20072750	20073488
qSYM-c02-1	Gh_A02G0832	NA	NA	20331051	20331731
qSYM-c02-1	Gh_A02G0833	TTC7B	Tetratricopeptide repeat protein 7B	20356330	20358931
qSYM-c02-1	Gh_A02G0834	IDM1	Increased DNA methylation 1	20379939	20381645
qSYM-c02-1	Gh_A02G0835	IFRD1	Interferon-related developmental regulator 1	20382545	20385645
qSYM-c02-1	Gh_A02G0836	ZAT10	Zinc finger protein ZAT10	20640406	20641125
qSYM-c02-1	Gh_A02G0837	QWRF2	QWRF motif-containing protein 2	20642665	20646592
qSYM-c02-1	Gh_A02G0838	NA	NA	20664032	20664854
qSYM-c02-1	Gh_A02G0839	SBT1.7	Subtilisin-like protease SBT1.7	20858525	20860825
qSYM-c02-1	Gh_A02G0840	NA	NA	20861576	20862901
qSYM-c02-1	Gh_A02G0841	NA	Cytochrome b5	20864284	20864788
qSYM-c02-1	Gh_A02G0842	VEP1	3-oxo-Delta(4,5)-steroid 5-beta-reductase	20865969	20868031
qSYM-c02-1	Gh_A02G0843	APUM12	Pumilio homolog 12	20943293	20946065
qSYM-c02-1	Gh_A02G0844	CYP81E7	Isoflavone 2'-hydroxylase	20959751	20961368
qSYM-c02-1	Gh_A02G0845	NA	NA	20962813	20964572
qSYM-c02-1	Gh_A02G0846	NA	NA	20981707	20982972
qSYM-c02-1	Gh_A02G0847	CYP81E1	Isoflavone 2'-hydroxylase	21056704	21058882
qSYM-c02-1	Gh_A02G0848	PK1	Putative receptor protein kinase ZmPK1	21153783	21154481
qSYM-c02-1	Gh_A02G0849	CYCD3-1	Cyclin-D3-1	21393544	21394887
qSYM-c02-1	Gh_A02G0850	DCL	Protein DCL, chloroplastic	21425589	21428742
qSYM-c02-1	Gh_A02G0851	WOX4	WUSCHEL-related homeobox 4	22056095	22057042
qSYM-c02-1	Gh_A02G0852	PAB2	Polyadenylate-binding protein 2	22636991	22640686
qSYM-c02-1	Gh_A02G0853	CLV1	Receptor protein kinase CLAVATA1	23042849	23045880
qSYM-c02-1	Gh_A02G0854	SYT2	Synaptotagmin-2	23210658	23214856
qSYM-c02-1	Gh_A02G0855	NA	NA	23638748	23639395
qSYM-c02-1	Gh_A02G0856	dlc-1	Dynein light chain 1, cytoplasmic	24140479	24140981
qSYM-c02-1	Gh_A02G0857	ARAC3	Rac-like GTP-binding protein ARAC3	24187771	24189275
qSYM-c02-1	Gh_A02G0858	FREE1	Protein FREE1	24313106	24317120
qSYM-c02-1	Gh_A02G0859	P4H3	Probable prolyl 4-hydroxylase 3	24321288	24323564
qSYM-c02-1	Gh_A02G0860	NA	NA	24360964	24361472
qSYM-c02-1	Gh_A02G0861	NA	NA	24369002	24370483
qSYM-c02-1	Gh_A02G0862	4CLL5	4-coumarate--CoA ligase-like 5	24380134	24383076
qSYM-c02-1	Gh_A02G0863	At4g35230	Probable serine/threonine-protein kinase At4g35230	24717849	24719249
qSYM-c02-1	Gh_A02G0864	At1g04910	Uncharacterized protein At1g04910	25142031	25146324
qSYM-c02-1	Gh_A02G0865	ERF114	Ethylene-responsive transcription factor ERF114	25209189	25210032
qSYM-c02-1	Gh_A02G0866	XTH23	Probable xyloglucan endotransglucosylase/hydrolase protein 23	25210658	25211584
qSYM-c02-1	Gh_A02G0867	AAE1	Probable acyl-activating enzyme 1, peroxisomal	25506302	25508539
qSYM-c02-1	Gh_A02G0868	SMD3B	Small nuclear ribonucleoprotein SmD3b	25917618	25918989
qSYM-c02-1	Gh_A02G0869	PUB15	U-box domain-containing protein 15	26000996	26003278
qSYM-c02-1	Gh_A02G0870	NAK	Probable serine/threonine-protein kinase NAK	26028637	26031902
qSYM-c02-1	Gh_A02G0871	BRPF3	Bromodomain and PHD finger-containing protein 3	26513646	26517693
qSYM-c02-1	Gh_A02G0872	CIPK3	CBL-interacting serine/threonine-protein kinase 3	26580897	26582742
qSYM-c02-1	Gh_A02G0873	HMGB2	High mobility group B protein 2	26601563	26615435
qSYM-c02-1	Gh_A02G0874	At2g33700	Probable protein phosphatase 2C 27	26617261	26620203
qSYM-c02-1	Gh_A02G0875	NA	NA	26820400	26822529
qSYM-c02-1	Gh_A02G0876	OST1A	Dolichyl-diphosphooligosaccharide--protein glycosyltransferase subunit 1A	27073274	27078613
qSYM-c02-1	Gh_A02G0877	ATXR7	Histone-lysine N-methyltransferase ATXR7	27711269	27716251
qSYM-c02-1	Gh_A02G0878	PFP-ALPHA	Pyrophosphate--fructose 6-phosphate 1-phosphotransferase subunit alpha	27983885	27988803
qSYM-c02-1	Gh_A02G0879	POPTRDRAFT_831870	Biotin carboxylase 1, chloroplastic	28189371	28201037
qSYM-c02-1	Gh_A02G0880	Cag_1601	UPF0301 protein Cag_1601	28221715	28223925
qSYM-c02-1	Gh_A02G0881	SGR2	Phospholipase SGR2	28854627	28917703
qSYM-c02-1	Gh_A02G0882	At5g49770	Probable leucine-rich repeat receptor-like protein kinase At5g49770	29031783	29035969
qSYM-c02-1	Gh_A02G0883	NA	NA	29093948	29112221
qSYM-c02-1	Gh_A02G0884	At1g71250	GDSL esterase/lipase At1g71250	29156790	29159501
qSYM-c02-1	Gh_A02G0885	NA	NA	29188583	29192333
qSYM-c02-1	Gh_A02G0886	NA	Histone H3.3	29670527	29672050
qSYM-c02-1	Gh_A02G0887	GAOA	Galactose oxidase	29677346	29678992
qSYM-c02-1	Gh_A02G0888	At1g19860	Zinc finger CCCH domain-containing protein 6	29792286	29794838
qSYM-c02-1	Gh_A02G0889	PCMP-E36	Pentatricopeptide repeat-containing protein At4g21300	30679245	30680006
qSYM-c02-1	Gh_A02G0890	PCMP-E36	Pentatricopeptide repeat-containing protein At4g21300	30682261	30684753
qSYM-c02-1	Gh_A02G0891	At1g30630	Coatomer subunit epsilon-1	30800626	30806160
qSYM-c02-1	Gh_A02G0892	NA	NA	30959536	30959898
qSYM-c02-1	Gh_A02G0893	SELMODRAFT_448915	FAS1 domain-containing protein SELMODRAFT_448915	31525117	31525881
qSYM-c02-1	Gh_A02G0894	NA	Stearoyl-[acyl-carrier-protein] 9-desaturase, chloroplastic	32028445	32031441
qSYM-c02-1	Gh_A02G0895	CIRH1A	Cirhin	32174343	32180477
qSYM-c02-1	Gh_A02G0896	GAUT7	Probable galacturonosyltransferase 7	32207939	32213457
qSYM-c02-1	Gh_A02G0897	Os03g0268000	Serine/threonine-protein phosphatase PP1	32391210	32393536
qSYM-c02-1	Gh_A02G0898	NSI	Acetyltransferase NSI	32432796	32434780
qSYM-c02-1	Gh_A02G0899	At1g06840	Probable LRR receptor-like serine/threonine-protein kinase At1g06840	32458392	32466783
qSYM-c02-1	Gh_A02G0900	PATL4	Patellin-4	32476174	32476386
qSYM-c02-1	Gh_A02G0901	PATL4	Patellin-4	32476425	32477806
qSYM-c02-1	Gh_A02G0902	scw1	Cell wall integrity protein scw1	32540835	32548531
qSYM-c02-1	Gh_A02G0903	FAH1	Fatty acid 2-hydroxylase 1	32630749	32633490
qSYM-c02-1	Gh_A02G0904	CKS1	Cyclin-dependent kinases regulatory subunit 1	32693280	32695173
qSYM-c02-1	Gh_A02G0905	slr0305	TVP38/TMEM64 family membrane protein slr0305	32789373	32793603
qSYM-c02-1	Gh_A02G0906	NA	NA	33711540	33716766
qSYM-c02-1	Gh_A02G0907	MNS1	Mannosyl-oligosaccharide 1,2-alpha-mannosidase MNS1	33835972	33856238
qSYM-c02-1	Gh_A02G0908	COG4	Conserved oligomeric Golgi complex subunit 4	33927769	33931882
qSYM-c02-1	Gh_A02G0909	RPS4	40S ribosomal protein S4	34356495	34358243
qSYM-c02-1	Gh_A02G0910	ANX2	Receptor-like protein kinase ANXUR2	34480486	34481649
qSYM-c02-1	Gh_A02G0911	polA	DNA polymerase I	34510835	34533626
qSYM-c02-1	Gh_A02G0912	At3g11710	Lysine--tRNA ligase, cytoplasmic	34534757	34538550
qSYM-c02-1	Gh_A02G0913	NA	Alpha-glucosidase 2	34669074	34689596
qSYM-c02-1	Gh_A02G0914	NA	NA	34897517	34897741
qSYM-c02-1	Gh_A02G0915	IM30	Membrane-associated 30 kDa protein, chloroplastic	34898785	34904679
qSYM-c02-1	Gh_A02G0916	NA	NA	34937996	34938487
qSYM-c02-1	Gh_A02G0917	NA	NA	34985283	34986523
qSYM-c02-1	Gh_A02G0918	At1g64065	Late embryogenesis abundant protein At1g64065	35041425	35042087
qSYM-c02-1	Gh_A02G0919	PGM1	2,3-bisphosphoglycerate-independent phosphoglycerate mutase	35049175	35052812
qSYM-c02-1	Gh_A02G0920	CML42	Calcium-binding protein CML42	35094386	35094964
qSYM-c02-1	Gh_A02G0921	FKBP16-3	Peptidyl-prolyl cis-trans isomerase FKBP16-3, chloroplastic	35111125	35113845
qSYM-c02-1	Gh_A02G0922	NA	NA	35177977	35178504
qSYM-c02-1	Gh_A02G0923	At3g46870	Pentatricopeptide repeat-containing protein At3g46870	35192242	35193578
qSYM-c02-1	Gh_A02G0924	TBC1D22B	TBC1 domain family member 22B	35194957	35200048
qSYM-c02-1	Gh_A02G0925	NLP8	Protein NLP8	35249348	35255298
qSYM-c02-1	Gh_A02G0926	Tbc1d15	TBC1 domain family member 15	35276085	35285995
qSYM-c02-1	Gh_A02G0927	PER61	Probable peroxidase 61	35288344	35290345
qSYM-c02-1	Gh_A02G0928	NA	NA	35505678	35511530
qSYM-c02-1	Gh_A02G0929	RPL38	60S ribosomal protein L38	35570410	35571845
qSYM-c02-1	Gh_A02G0930	RBL13	RHOMBOID-like protein 13	35599800	35600651
qSYM-c02-1	Gh_A02G0931	FRS5	Protein FAR1-RELATED SEQUENCE 5	36012181	36014505
qSYM-c02-1	Gh_A02G0932	At1g16860	Uncharacterized membrane protein At1g16860	36249502	36253683
qSYM-c02-1	Gh_A02G0933	YAO	U3 snoRNP-associated protein-like YAO	37438906	37444611
qSYM-c02-1	Gh_A02G0934	GT-2	Trihelix transcription factor GT-2	38131247	38133760
qSYM-c02-1	Gh_A02G0935	Tmem120b	Transmembrane protein 120B	38235456	38242709
qSYM-c02-1	Gh_A02G0936	At4g10440	Probable methyltransferase PMT17	38243783	38246225
qSYM-c02-1	Gh_A02G0937	RPL9	60S ribosomal protein L9	38575953	38577113
qSYM-c02-1	Gh_A02G0938	NUP98A	Nuclear pore complex protein NUP98A	38581675	38589546
qSYM-c02-1	Gh_A02G0939	NA	NA	38650439	38650912
qSYM-c02-1	Gh_A02G0940	2009-03-01	E3 ubiquitin-protein ligase MARCH9	38803225	38805744
qSYM-c02-1	Gh_A02G0941	NAC014	NAC domain-containing protein 14	38809428	38812119
qSYM-c02-1	Gh_A02G0942	NA	NA	38813777	38813950
qSYM-c02-1	Gh_A02G0943	NA	NA	38975743	38976036
qSYM-c02-1	Gh_A02G0944	Os03g0120900	B3 domain-containing protein Os03g0120900	39016098	39017294
qSYM-c02-1	Gh_A02G0945	At3g44326	F-box protein At3g44326	39112983	39114065
qSYM-c02-1	Gh_A02G0946	MTP1	Metal tolerance protein 1	39151656	39152921
qSYM-c02-1	Gh_A02G0947	SBT3.5	Subtilisin-like protease SBT3.5	39400348	39403430
qSYM-c02-1	Gh_A02G0948	ABIL3	Protein ABIL3	39408701	39410949
qSYM-c02-1	Gh_A02G0949	NLP7	Protein NLP7	39455243	39459094
qSYM-c02-1	Gh_A02G0950	SWEET7	Bidirectional sugar transporter SWEET7	39459757	39462756
qSYM-c02-1	Gh_A02G0951	BIP5	Luminal-binding protein 5	39564783	39568727
qSYM-c02-1	Gh_A02G0952	At4g31240	Probable nucleoredoxin 3	39569019	39570986
qSYM-c02-1	Gh_A02G0953	NA	NA	39571776	39574540
qSYM-c02-1	Gh_A02G0954	NA	NA	39908443	39911489
qSYM-c02-1	Gh_A02G0955	TRE1	Trehalase	40054936	40057712
qSYM-c02-1	Gh_A02G0956	WDR44	WD repeat-containing protein 44	40194327	40197265
qSYM-c02-1	Gh_A02G0957	DOF4.6	Dof zinc finger protein DOF4.6	40522150	40523342
qSYM-c02-1	Gh_A02G0958	LHW	Transcription factor LHW	40584297	40588366
qSYM-c02-1	Gh_A02G0959	ALMT10	Aluminum-activated malate transporter 10	40590073	40591932
qSYM-c02-1	Gh_A02G0960	NA	NA	40719162	40724357
qSYM-c02-1	Gh_A02G0961	PUX10	Plant UBX domain-containing protein 10	40727423	40730083
qSYM-c02-1	Gh_A02G0962	NA	NA	40734138	40734398
qSYM-c02-1	Gh_A02G0963	WNK8	Serine/threonine-protein kinase WNK8	40734538	40736580
qSYM-c02-1	Gh_A02G0964	At2g25060	Early nodulin-like protein 1	40746617	40747285
qSYM-c02-1	Gh_A02G0965	rhmA	2-keto-3-deoxy-L-rhamnonate aldolase	40749232	40750275
qSYM-c02-1	Gh_A02G0966	NA	NA	40764220	40766407
qSYM-c02-1	Gh_A02G0967	YSL1	Metal-nicotianamine transporter YSL1	40971164	40973960
qSYM-c02-1	Gh_A02G0968	NA	NA	40974352	40981016
qSYM-c02-1	Gh_A02G0969	EMB8	Embryogenesis-associated protein EMB8	41076765	41085313
qSYM-c02-1	Gh_A02G0970	CYP78A6	Cytochrome P450 78A6	41111353	41113644
qSYM-c02-1	Gh_A02G0971	D27	Beta-carotene isomerase D27, chloroplastic	41374920	41376787
qSYM-c02-1	Gh_A02G0972	CEL1	Endoglucanase 1	41404980	41406777
qSYM-c02-1	Gh_A02G0973	DIR3	Dirigent protein 3	41449622	41450212
qSYM-c02-1	Gh_A02G0974	POPTR_0001s40980g	Probable bifunctional methylthioribulose-1-phosphate dehydratase/enolase-phosphatase E1	41453764	41455148
qSYM-c02-1	Gh_A02G0975	Gpr107	Protein GPR107	41458405	41459718
qSYM-c02-1	Gh_A02G0976	At5g39865	Uncharacterized protein At5g39865	41460645	41462576
qSYM-c02-1	Gh_A02G0977	NAC043	NAC domain-containing protein 43	41481288	41482619
qSYM-c02-1	Gh_A02G0978	NA	NA	41936719	41936991
qSYM-c02-1	Gh_A02G0979	ARF9	Auxin response factor 9	41939507	41943240
qSYM-c02-1	Gh_A02G0980	NA	NA	42029031	42029543
qSYM-c02-1	Gh_A02G0981	KELP	RNA polymerase II transcriptional coactivator KELP	42030082	42031864
qSYM-c02-1	Gh_A02G0982	SKIP8	F-box protein SKIP8	42191874	42193500
qSYM-c02-1	Gh_A02G0983	SPBC3E7.09	Uncharacterized protein slp1	42466150	42468320
qSYM-c02-1	Gh_A02G0984	PI4KG2	Phosphatidylinositol 4-kinase gamma 2	42524970	42526684
qSYM-c02-1	Gh_A02G0985	NA	NA	42528734	42529390
qSYM-c02-1	Gh_A02G0986	NA	UDP-glucose 4-epimerase GEPI48	42561337	42564391
qSYM-c02-1	Gh_A02G0987	NA	NA	42832831	42833256
qSYM-c02-1	Gh_A02G0988	NA	NA	42851659	42851937
qSYM-c02-1	Gh_A02G0989	ATL21B	Putative RING-H2 finger protein ATL21B	43022395	43024761
qSYM-c02-1	Gh_A02G0990	psbB	Photosystem II CP47 reaction center protein	43150332	43150806
qSYM-c02-1	Gh_A02G0991	psbH	Photosystem II reaction center protein H	43152608	43152829
qSYM-c02-1	Gh_A02G0992	psbB	Photosystem II CP47 reaction center protein	43155652	43156188
qSYM-c02-1	Gh_A02G0993	ATL22	RING-H2 finger protein ATL22	43270200	43271405
qSYM-c02-1	Gh_A02G0994	ATL21B	Putative RING-H2 finger protein ATL21B	43272630	43273801
qSYM-c02-1	Gh_A02G0995	ATL21A	Putative RING-H2 finger protein ATL21A	43314404	43315648
qSYM-c02-1	Gh_A02G0996	OXA1	Mitochondrial inner membrane protein OXA1	43379724	43382896
qSYM-c02-1	Gh_A02G0997	LACS4	Long chain acyl-CoA synthetase 4	43433672	43439671
qSYM-c02-1	Gh_A02G0998	inlI	Internalin-I	43553950	43556875
qSYM-c02-1	Gh_A02G0999	Os01g0656200	Probable protein phosphatase 2C 8	43560204	43561403
qSYM-c02-1	Gh_A02G1000	At1g64390	Endoglucanase 6	43562140	43565075
qSYM-c02-1	Gh_A02G1001	NA	NA	43632586	43635231
qSYM-c02-1	Gh_A02G1002	NA	NA	43703233	43703607
qSYM-c02-1	Gh_A02G1003	At5g41800	Probable GABA transporter 2	43727162	43729873
qSYM-c02-1	Gh_A02G1004	NA	NA	43812129	43814168
qSYM-c02-1	Gh_A02G1005	CRF2	Ethylene-responsive transcription factor CRF2	43974023	43975006
qSYM-c02-1	Gh_A02G1006	NA	NA	44440453	44440755
qSYM-c02-1	Gh_A02G1007	NA	Ubiquitin-conjugating enzyme E2-17 kDa	44484762	44487324
qSYM-c02-1	Gh_A02G1008	NA	NA	44518451	44519452
qSYM-c02-1	Gh_A02G1009	ABCC10	ABC transporter C family member 10	44560865	44572175
qSYM-c02-1	Gh_A02G1010	NA	NA	44572390	44573256
qSYM-c02-1	Gh_A02G1011	NA	NA	44594432	44596465
qSYM-c02-1	Gh_A02G1012	NA	NA	44612664	44613347
qSYM-c02-1	Gh_A02G1013	NA	NA	44680124	44680708
qSYM-c02-1	Gh_A02G1014	CHX18	Cation/H(+) antiporter 18	44730408	44733008
qSYM-c02-1	Gh_A02G1015	NA	Retrovirus-related Pol polyprotein from transposon TNT 1-94	44754806	44756693
qSYM-c02-1	Gh_A02G1016	NA	NA	44803320	44803773
qSYM-c02-1	Gh_A02G1017	CHX18	Cation/H(+) antiporter 18	44834278	44836861
qSYM-c02-1	Gh_A02G1018	NA	NA	44864417	44865265
qSYM-c02-1	Gh_A02G1019	CHX18	Cation/H(+) antiporter 18	44877198	44880112
qSYM-c02-1	Gh_A02G1020	pol	Retrovirus-related Pol polyprotein from transposon 297	45046408	45069330
qSYM-c02-1	Gh_A02G1021	At1g65750	Putative ribonuclease H protein At1g65750	45077910	45078191
qSYM-c02-1	Gh_A02G1022	At1g65750	Putative ribonuclease H protein At1g65750	45078955	45080060
qSYM-c02-1	Gh_A02G1023	PI206	Disease resistance response protein 206	45092646	45093203
qSYM-c02-1	Gh_A02G1024	PI206	Disease resistance response protein 206	45132081	45132644
qSYM-c02-1	Gh_A02G1025	NA	NA	45470132	45471314
qSYM-c02-1	Gh_A02G1026	WRKY19	Probable WRKY transcription factor 19	45570605	45572635
qSYM-c02-1	Gh_A02G1027	ALMT3	Putative aluminum-activated malate transporter 3	45572999	45574268
qSYM-c02-1	Gh_A02G1028	APK2B	Protein kinase 2B, chloroplastic	45584860	45586806
qSYM-c02-1	Gh_A02G1029	CPK3	Calcium-dependent protein kinase 3	45630623	45633866
qSYM-c02-1	Gh_A02G1030	POT3	Potassium transporter 3	45635799	45645277
qSYM-c02-1	Gh_A02G1031	SPCC24B10.10c	Uncharacterized AAA domain-containing protein C24B10.10c	45650262	45654564
qSYM-c02-1	Gh_A02G1032	RTNLB5	Reticulon-like protein B5	45655702	45657182
qSYM-c02-1	Gh_A02G1033	CBSDUF3	DUF21 domain-containing protein At2g14520	45661536	45664650
qSYM-c02-1	Gh_A02G1034	UGT88A1	UDP-glycosyltransferase 88A1	45732158	45733447
qSYM-c02-1	Gh_A02G1035	MAKR2	Probable membrane-associated kinase regulator 2	45788686	45789817
qSYM-c02-1	Gh_A02G1036	NA	NA	45886235	45887218
qSYM-c02-1	Gh_A02G1037	At1g64065	Late embryogenesis abundant protein At1g64065	45925469	45926110
qSYM-c02-1	Gh_A02G1038	At1g64065	Late embryogenesis abundant protein At1g64065	45932119	45932751
qSYM-c02-1	Gh_A02G1039	At5g41590	Protein LURP-one-related 17	46280474	46281231
qSYM-c02-1	Gh_A02G1040	PP1	Serine/threonine-protein phosphatase PP1	46448017	46451316
qSYM-c02-1	Gh_A02G1041	WDR7	WD repeat-containing protein 7	46452416	46460744
qSYM-c02-1	Gh_A02G1042	WRKY29	Probable WRKY transcription factor 29	46464666	46465673
qSYM-c02-1	Gh_A02G1043	Pinx1	PIN2/TERF1-interacting telomerase inhibitor 1	46471617	46475354
qSYM-c02-1	Gh_A02G1044	NA	NA	46476643	46479330
qSYM-c02-1	Gh_A02G1045	ISPF	2-C-methyl-D-erythritol 2,4-cyclodiphosphate synthase, chloroplastic	46480249	46486627
qSYM-c02-1	Gh_A02G1046	ACS1	1-aminocyclopropane-1-carboxylate synthase	46495319	46497616
qSYM-c02-1	Gh_A02G1047	At1g50920	Nucleolar GTP-binding protein 1	46535618	46537642
qSYM-c02-1	Gh_A02G1048	Luc7l	Putative RNA-binding protein Luc7-like 1	46770821	46778046
qSYM-c02-1	Gh_A02G1049	PAT04	Probable protein S-acyltransferase 4	47142112	47164834
qSYM-c02-1	Gh_A02G1050	BGLU42	Beta-glucosidase 42	48061574	48082007
qSYM-c02-1	Gh_A02G1051	CRT3	Calreticulin-3	48252871	48257791
qSYM-c02-1	Gh_A02G1052	NA	NA	48272495	48277468
qSYM-c02-1	Gh_A02G1053	At1g65420	Ycf20-like protein	48316142	48316908
qSYM-c02-1	Gh_A02G1054	At3g03305	Putative metallophosphoesterase At3g03305	48464621	48471993
qSYM-c02-1	Gh_A02G1055	GAST1	Protein GAST1	48953564	48955107
qSYM-c02-1	Gh_A02G1056	WIP2	Zinc finger protein WIP2	49593402	49596276
qSYM-c02-1	Gh_A02G1057	NRPA1	DNA-directed RNA polymerase I subunit 1	50380659	50399982
qSYM-c02-1	Gh_A02G1058	MIZ1	Protein MIZU-KUSSEI 1	51056047	51056877
qSYM-c02-1	Gh_A02G1059	NTRC	NADPH-dependent thioredoxin reductase 3	51361038	51366278
qSYM-c02-1	Gh_A02G1060	VLN2	Villin-2	51541268	51558386
qSYM-c02-1	Gh_A02G1061	At2g41710	AP2-like ethylene-responsive transcription factor At2g41710	51622749	51631501
qSYM-c02-1	Gh_A02G1062	HSFB3	Heat stress transcription factor B-3	51688373	51690279
qSYM-c02-1	Gh_A02G1063	NA	NA	51714106	51715746
qSYM-c02-1	Gh_A02G1064	NA	NA	51783243	51783521
qSYM-c02-1	Gh_A02G1065	PXC3	Leucine-rich repeat receptor-like tyrosine-protein kinase PXC3	52198945	52201711
qSYM-c02-1	Gh_A02G1066	CESA3	Cellulose synthase A catalytic subunit 3 [UDP-forming]	52395934	52402398
qSYM-c02-1	Gh_A02G1067	NA	NA	52437802	52438155
qSYM-c02-1	Gh_A02G1068	PLL5	Probable protein phosphatase 2C 4	52439947	52448060
qSYM-c02-1	Gh_A02G1069	NA	NA	52449451	52449618
qSYM-c02-1	Gh_A02G1070	PGLP1B	Phosphoglycolate phosphatase 1B, chloroplastic	53192664	53204209
qSYM-c02-1	Gh_A02G1071	SPAC57A10.07	Uncharacterized protein C57A10.07	53763944	53765082
qSYM-c02-1	Gh_A02G1072	VPS45	Vacuolar protein sorting-associated protein 45 homolog	53956262	53962432
qSYM-c02-1	Gh_A02G1073	MYB44	Transcription factor MYB44	54132423	54133735
qSYM-c02-1	Gh_A02G1074	NA	NA	54244832	54245830
qSYM-c02-1	Gh_A02G1075	MMD1	PHD finger protein MALE MEIOCYTE DEATH 1	54497875	54500609
qSYM-c02-1	Gh_A02G1076	UREF	Urease accessory protein F	54501843	54503063
qSYM-c02-1	Gh_A02G1077	ATJ10	Chaperone protein dnaJ 10	54503668	54507115
qSYM-c02-1	Gh_A02G1078	SKP2B	F-box protein SKP2B	54673741	54676537
qSYM-c02-1	Gh_A02G1079	CYCA1-1	Cyclin-A1-1	55073241	55076099
qSYM-c02-1	Gh_A02G1080	AAP3	Amino acid permease 3	55125355	55127741
qSYM-c02-1	Gh_A02G1081	AUXI1	Auxilin-related protein 1	55291304	55296272
qSYM-c02-1	Gh_A02G1082	At1g77360	Pentatricopeptide repeat-containing protein At1g77360, mitochondrial	55338966	55340408
qSYM-c02-1	Gh_A02G1083	NA	NA	55344110	55344397
qSYM-c02-1	Gh_A02G1084	SECA2	Protein translocase subunit SECA2, chloroplastic	55393220	55412383
qSYM-c02-1	Gh_A02G1085	At1g77330	1-aminocyclopropane-1-carboxylate oxidase 5	55454171	55455237
qSYM-c02-1	Gh_A02G1086	NADK2	NAD kinase 2, chloroplastic	55456735	55461867
qSYM-c02-1	Gh_A02G1087	topbp1-A	DNA topoisomerase 2-binding protein 1-A	55463572	55469995
qSYM-c02-1	Gh_A02G1088	At1g65750	Putative ribonuclease H protein At1g65750	55506082	55507641
qSYM-c02-1	Gh_A02G1089	NA	NA	55509917	55511068
qSYM-c02-1	Gh_A02G1090	NA	NA	55515671	55521753
qSYM-c02-1	Gh_A02G1091	NA	NA	55528305	55528886
qSYM-c02-1	Gh_A02G1092	TCHQD	Glutathione S-transferase TCHQD	55540806	55541999
qSYM-c02-1	Gh_A02G1093	NA	NA	55828686	55830254
qSYM-c02-1	Gh_A02G1094	PERK11	Putative proline-rich receptor-like protein kinase PERK11	56010064	56014236
qSYM-c02-1	Gh_A02G1095	ndhM	NAD(P)H-quinone oxidoreductase subunit M, chloroplastic	56040137	56041156
qSYM-c02-1	Gh_A02G1096	USP	UDP-sugar pyrophosphorylase	56042772	56049789
qSYM-c02-1	Gh_A02G1097	NA	NA	56235808	56236194
qSYM-c02-1	Gh_A02G1098	NA	NA	56268692	56268889
qSYM-c02-1	Gh_A02G1099	WAK2	Wall-associated receptor kinase 2	56279712	56280827
qSYM-c02-1	Gh_A02G1100	WAK2	Wall-associated receptor kinase 2	56291271	56302620
qSYM-c02-1	Gh_A02G1101	NA	NA	56754323	56755451
qSYM-c02-1	Gh_A02G1102	PCMP-A5	Pentatricopeptide repeat-containing protein At3g26540	56775699	56777801
qSYM-c02-1	Gh_A02G1103	QCR7-2	Cytochrome b-c1 complex subunit 7-2	57469962	57475796
qSYM-c02-1	Gh_A02G1104	NA	NA	58047779	58049411
qSYM-c02-1	Gh_A02G1105	NA	Retrovirus-related Pol polyprotein from transposon TNT 1-94	58176005	58176955
qSYM-c02-1	Gh_A02G1106	NA	NA	58196766	58198867
qSYM-c02-1	Gh_A02G1107	NA	NA	58287918	58289224
qSYM-c02-1	Gh_A02G1108	NA	NA	58361402	58362223
qSYM-c02-1	Gh_A02G1109	TSO1	CRC domain-containing protein TSO1	58710959	58715621
qSYM-c02-1	Gh_A02G1110	NA	NA	58847058	58848278
qSYM-c02-1	Gh_A02G1111	BT1	Adenine nucleotide transporter BT1, chloroplastic/mitochondrial	59366589	59369321
qSYM-c02-1	Gh_A02G1112	CDI	Protein CDI	60063325	60064086
qSYM-c02-1	Gh_A02G1113	VTE4	Tocopherol O-methyltransferase, chloroplastic	60092759	60096468
qSYM-c02-1	Gh_A02G1114	SUFE1	SufE-like protein 1, chloroplastic/mitochondrial	60162517	60163578
qSYM-c02-1	Gh_A02G1115	NA	NA	60175952	60177699
qSYM-c02-1	Gh_A02G1116	NA	NA	60178670	60181875
qSYM-c02-1	Gh_A02G1117	CYP89A2	Cytochrome P450 89A2	60222599	60224137
qSYM-c02-1	Gh_A02G1118	RHD3	Protein ROOT HAIR DEFECTIVE 3	60493217	60501516
qSYM-c02-1	Gh_A02G1119	CWINV1	Beta-fructofuranosidase, insoluble isoenzyme CWINV1	60773746	60776235
qSYM-c02-1	Gh_A02G1120	NAP1	Nucleosome assembly protein 1	60828018	60831573
qSYM-c02-1	Gh_A02G1121	NA	NA	60832585	60836112
qSYM-c02-1	Gh_A02G1122	BGAL1	Beta-galactosidase 1	60869586	60875039
qSYM-c02-1	Gh_A02G1123	FLXL3	Protein FLX-like 3	60902841	60935836
qSYM-c02-1	Gh_A02G1124	PLDALPHA4	Phospholipase D alpha 4	60940992	60943829
qSYM-c02-1	Gh_A02G1125	PRA1F2	PRA1 family protein F2	61147769	61148326
qSYM-c02-1	Gh_A02G1126	PP2AB2	Serine/threonine protein phosphatase 2A 55 kDa regulatory subunit B beta isoform	61205719	61212541
qSYM-c02-1	Gh_A02G1127	NA	NA	61287828	61288744
qSYM-c02-1	Gh_A02G1128	Rwdd1	RWD domain-containing protein 1	61315487	61320956
qSYM-c02-1	Gh_A02G1129	MED23	Mediator of RNA polymerase II transcription subunit 23	61322274	61324738
qSYM-c02-1	Gh_A02G1130	Exd1	Exonuclease 3'-5' domain-containing protein 1	61346063	61366622
qSYM-c02-1	Gh_A02G1131	BHLH87	Transcription factor bHLH87	61707065	61708336
qSYM-c02-1	Gh_A02G1132	CHUP1	Protein CHUP1, chloroplastic	61783004	61784964
qSYM-c02-1	Gh_A02G1133	PFK3	ATP-dependent 6-phosphofructokinase 3	61785439	61788827
qSYM-c02-1	Gh_A02G1134	NA	NA	61800502	61801467
qSYM-c02-1	Gh_A02G1135	NA	Profilin-3	61854883	61857345
qSYM-c02-1	Gh_A02G1136	IQD31	Protein IQ-DOMAIN 31	61960094	61961481
qSYM-c02-1	Gh_A02G1137	LYK3	LysM domain receptor-like kinase 3	62263792	62269057
qSYM-c02-1	Gh_A02G1138	VIP2	Protein PAF1 homolog	62269661	62274986
qSYM-c02-1	Gh_A02G1139	NADP-ME4	NADP-dependent malic enzyme 4, chloroplastic	62327400	62332541
qSYM-c02-1	Gh_A02G1140	ABCG35	ABC transporter G family member 35	62604949	62613432
qSYM-c02-1	Gh_A02G1141	At1g77330	1-aminocyclopropane-1-carboxylate oxidase 5	62626533	62629125
qSYM-c02-1	Gh_A02G1142	At2g44660	Probable dolichyl pyrophosphate Glc1Man9GlcNAc2 alpha-1,3-glucosyltransferase	62631827	62637868
qSYM-c02-1	Gh_A02G1143	NA	NA	62793036	62794227
qSYM-c02-1	Gh_A02G1144	NA	NA	62925802	62926422
qSYM-c02-1	Gh_A02G1145	CDC27B	Cell division cycle protein 27 homolog B	62930409	62937995
qSYM-c02-1	Gh_A02G1146	BHLH83	Transcription factor bHLH83	62985258	62986522
qSYM-c02-1	Gh_A02G1147	NA	NA	62989240	62989851
qSYM-c02-1	Gh_A02G1148	NA	NA	63145284	63145583
qSYM-c02-1	Gh_A02G1149	GATA12	GATA transcription factor 12	63341772	63343035
qSYM-c02-1	Gh_A02G1150	NA	NA	63525353	63525806
qSYM-c02-1	Gh_A02G1151	NUP35	Nuclear pore complex protein NUP35	63552765	63554731
qSYM-c02-1	Gh_A02G1152	POPTRDRAFT_553757	CASP-like protein 3A1	63822885	63824406
qSYM-c02-1	Gh_A02G1153	DREB3	Dehydration-responsive element-binding protein 3	64131983	64132663
qSYM-c02-1	Gh_A02G1154	NA	NA	64437466	64439925
qSYM-c02-1	Gh_A02G1155	At3g16270	VHS domain-containing protein At3g16270	64477104	64480849
qSYM-c02-1	Gh_A02G1156	IAA27	Auxin-responsive protein IAA27	64838135	64839789
qSYM-c02-1	Gh_A02G1157	PSP	Phosphoserine phosphatase, chloroplastic	65124262	65126108
qSYM-c02-1	Gh_A02G1158	RRN3	RNA polymerase I-specific transcription initiation factor RRN3	65172497	65177537
qSYM-c02-1	Gh_A02G1159	At1g79820	Probable plastidic glucose transporter 3	65198707	65202987
qSYM-c02-1	Gh_A02G1160	PDR3	Pleiotropic drug resistance protein 3	65306454	65331522
qSYM-c02-1	Gh_A02G1161	RAB7	Ras-related protein Rab7	65417768	65419906
qSYM-c02-1	Gh_A02G1162	NA	NA	65576164	65581207
qSYM-c02-1	Gh_A02G1163	NA	Dynein light chain LC6, flagellar outer arm	65595058	65595447
qSYM-c02-1	Gh_A02G1164	ROPGEF12	Rop guanine nucleotide exchange factor 12	65726425	65728844
qSYM-c02-1	Gh_A02G1165	PERK15	Proline-rich receptor-like protein kinase PERK15	65924181	65928756
qSYM-c02-1	Gh_A02G1166	RPL37C	60S ribosomal protein L37-3	65980288	65981346
qSYM-c02-1	Gh_A02G1167	KINESIN-13A	Kinesin-13A	66019410	66024289
qSYM-c02-1	Gh_A02G1168	SNX16	Sorting nexin-16	66104272	66111133
qSYM-c02-1	Gh_A02G1169	NA	NA	66291716	66291990
qSYM-c02-1	Gh_A02G1170	NA	NA	66300115	66304661
qSYM-c02-1	Gh_A02G1171	RHN1	Ras-related protein RHN1	66305873	66307382
qSYM-c02-1	Gh_A02G1172	NA	NA	66345252	66346605
qSYM-c02-1	Gh_A02G1173	OFP14	Transcription repressor OFP14	66398898	66399608
qSYM-c02-1	Gh_A02G1174	AOP1.2	Probable 2-oxoglutarate-dependent dioxygenase AOP1.2	66459026	66460252
qSYM-c02-1	Gh_A02G1175	SULTR3	Probable sulfate transporter 3.4	66538543	66542029
qSYM-c02-1	Gh_A02G1176	RPL7A	60S ribosomal protein L7a	66604831	66626822
qSYM-c02-1	Gh_A02G1177	At1g52360	Coatomer subunit beta'-2	66730717	66740067
qSYM-c02-1	Gh_A02G1178	NUP50A	Nuclear pore complex protein NUP50A	66775449	66776774
qSYM-c02-1	Gh_A02G1179	NA	NA	66824097	66829494
qSYM-c02-1	Gh_A02G1180	bshA	N-acetyl-alpha-D-glucosaminyl L-malate synthase	66832907	66835628
qSYM-c02-1	Gh_A02G1181	XRCC1	DNA-repair protein XRCC1	66983128	66987077
qSYM-c02-1	Gh_A02G1182	NAA15	N-alpha-acetyltransferase 15, NatA auxiliary subunit	67105535	67123043
qSYM-c02-1	Gh_A02G1183	RFC3	Replication factor C subunit 3	67129271	67131329
qSYM-c02-1	Gh_A02G1184	AOP1.2	Probable 2-oxoglutarate-dependent dioxygenase AOP1.2	67233478	67234731
qSYM-c02-1	Gh_A02G1185	GLYK	D-glycerate 3-kinase, chloroplastic	67485819	67490603
qSYM-c02-1	Gh_A02G1186	AAA1	Katanin p60 ATPase-containing subunit A1	67518071	67522072
qSYM-c02-1	Gh_A02G1187	SHM3	Serine hydroxymethyltransferase 3, chloroplastic	67523757	67525148
qSYM-c02-1	Gh_A02G1188	slc38a6	Probable sodium-coupled neutral amino acid transporter 6	67546130	67547599
qSYM-c02-1	Gh_A02G1189	NA	NA	67562406	67566585
qSYM-c02-1	Gh_A02G1190	G9	Polygalacturonase	67873889	67875402
qSYM-c02-1	Gh_A02G1191	G9	Polygalacturonase	67885200	67886717
qSYM-c02-1	Gh_A02G1192	yugF	Uncharacterized hydrolase YugF	68041883	68046816
qSYM-c02-1	Gh_A02G1193	Os03g0743400	Probable histone H2A variant 3	68047645	68050038
qSYM-c02-1	Gh_A02G1194	strap	Serine-threonine kinase receptor-associated protein	68068975	68073022
qSYM-c02-1	Gh_A02G1195	CPR30	F-box protein CPR30	68142778	68144021
qSYM-c02-1	Gh_A02G1196	PDR1	Pleiotropic drug resistance protein 1	68209269	68222043
qSYM-c02-1	Gh_A02G1197	AOP1.2	Probable 2-oxoglutarate-dependent dioxygenase AOP1.2	68283262	68284727
qSYM-c02-1	Gh_A02G1198	NA	NA	68288559	68291166
qSYM-c02-1	Gh_A02G1199	PCMP-H73	Pentatricopeptide repeat-containing protein At1g15510, chloroplastic	68292510	68295158
qSYM-c02-1	Gh_A02G1200	NA	Plastidic ATP/ADP-transporter	68363924	68366348
qSYM-c02-1	Gh_A02G1201	CSE	Caffeoylshikimate esterase	68475775	68477390
qSYM-c02-1	Gh_A02G1202	G9	Polygalacturonase	69020613	69022137
qSYM-c02-1	Gh_A02G1203	PER43	Peroxidase 43	69325920	69327130
qSYM-c02-1	Gh_A02G1204	ORC3	Origin of replication complex subunit 3	69428720	69444538
qSYM-c02-1	Gh_A02G1205	GRF4	Growth-regulating factor 4	69876127	69879623
qSYM-c02-1	Gh_A02G1206	GTG1	GPCR-type G protein 1	69961720	69969704
qSYM-c02-1	Gh_A02G1207	NA	NA	70177131	70179872
qSYM-c02-1	Gh_A02G1208	At5g60570	F-box/kelch-repeat protein At5g60570	70534244	70535626
qSYM-c02-1	Gh_A02G1209	At1g22430	Alcohol dehydrogenase-like 1	70739583	70741299
qSYM-c02-1	Gh_A02G1210	dnaJ	Chaperone protein DnaJ	70907499	70916599
qSYM-c02-1	Gh_A02G1211	At3g02910	Putative gamma-glutamylcyclotransferase At3g02910	70932286	70932819
qSYM-c02-1	Gh_A02G1212	At3g50808	Uncharacterized protein At3g50808	71102046	71103319
qSYM-c02-1	Gh_A02G1213	slr0537	Uncharacterized sugar kinase slr0537	71322411	71328407
qSYM-c02-1	Gh_A02G1214	VHA-H	V-type proton ATPase subunit H	71331172	71336037
qSYM-c02-1	Gh_A02G1215	TIF3A1	Eukaryotic translation initiation factor 3 subunit A	71406482	71411180
qSYM-c02-1	Gh_A02G1216	NA	NA	71517212	71517433
qSYM-c02-1	Gh_A02G1217	At5g16730	WEB family protein At5g16730, chloroplastic	71745658	71749195
qSYM-c02-1	Gh_A02G1218	NA	NA	71758851	71763022
qSYM-c02-1	Gh_A02G1219	CCR2	Cinnamoyl-CoA reductase 2	71763446	71764605
qSYM-c02-1	Gh_A02G1220	FLS2	LRR receptor-like serine/threonine-protein kinase FLS2	72347933	72351061
qSYM-c02-1	Gh_A02G1221	CCR1	Cinnamoyl-CoA reductase 1	73042284	73048402
qSYM-c02-1	Gh_A02G1222	NA	NA	73049059	73049475
qSYM-c02-1	Gh_A02G1223	At4g39970	Haloacid dehalogenase-like hydrolase domain-containing protein At4g39970	73292468	73295055
qSYM-c02-1	Gh_A02G1224	MED18	Mediator of RNA polymerase II transcription subunit 18	73295658	73297526
qSYM-c02-1	Gh_A02G1225	EPFL1	EPIDERMAL PATTERNING FACTOR-like protein 1	73298461	73298902
qSYM-c02-1	Gh_A02G1226	FBW2	F-box protein FBW2	73326064	73327498
qSYM-c02-1	Gh_A02G1227	NA	NA	73328948	73330826
qSYM-c02-1	Gh_A02G1228	PABN3	Polyadenylate-binding protein 3	73335126	73339244
qSYM-c02-1	Gh_A02G1229	RAB11A	Ras-related protein Rab11A	73356522	73358051
qSYM-c02-1	Gh_A02G1230	NSUN2	tRNA (cytosine(34)-C(5))-methyltransferase	73358521	73363777
qSYM-c02-1	Gh_A02G1231	rps6	40S ribosomal protein S6	73365363	73367218
qSYM-c02-1	Gh_A02G1232	At1g65010	Putative WEB family protein At1g65010, chloroplastic	73369261	73370988
qSYM-c02-1	Gh_A02G1233	PCMP-H24	Pentatricopeptide repeat-containing protein At4g02750	73373547	73375679
qSYM-c02-1	Gh_A02G1234	NA	Histone H3.3	73379480	73380175
qSYM-c02-1	Gh_A02G1235	NA	Histone H3.3	73383340	73384034
qSYM-c02-1	Gh_A02G1236	NA	NA	73432093	73432491
qSYM-c02-1	Gh_A02G1237	ATHB-6	Homeobox-leucine zipper protein ATHB-6	73523410	73524530
qSYM-c02-1	Gh_A02G1238	At4g01020	Putative uncharacterized protein At4g01020, chloroplastic	73557422	73564477
qSYM-c02-1	Gh_A02G1239	NA	NA	73564779	73565408
qSYM-c02-1	Gh_A02G1240	NA	NA	73579751	73580440
qSYM-c02-1	Gh_A02G1241	BHLH96	Transcription factor bHLH96	73602063	73603221
qSYM-c02-1	Gh_A02G1242	exgA	Probable glucan 1,3-beta-glucosidase A	73684007	73687515
qSYM-c02-1	Gh_A02G1243	SOT16	Cytosolic sulfotransferase 16	73818584	73819584
qSYM-c02-1	Gh_A02G1244	SOT16	Cytosolic sulfotransferase 16	73839103	73840110
qSYM-c02-1	Gh_A02G1245	SOT17	Cytosolic sulfotransferase 17	73890968	73891801
qSYM-c02-1	Gh_A02G1246	SOT15	Cytosolic sulfotransferase 15	73930616	73931629
qSYM-c02-1	Gh_A02G1247	GEM	GLABRA2 expression modulator	73957241	73957627
qSYM-c02-1	Gh_A02G1248	GEM	GLABRA2 expression modulator	73957685	73960216
qSYM-c02-1	Gh_A02G1249	ZHD1	Zinc-finger homeodomain protein 1	74019988	74020707
qSYM-c02-1	Gh_A02G1250	PFK5	ATP-dependent 6-phosphofructokinase 5, chloroplastic	74165599	74171506
qSYM-c02-1	Gh_A02G1251	CURT1D	Protein CURVATURE THYLAKOID 1D, chloroplastic	74223893	74225492
qSYM-c02-1	Gh_A02G1252	NA	NA	74228810	74229148
qSYM-c02-1	Gh_A02G1253	PUMP5	Mitochondrial uncoupling protein 5	74244165	74247153
qSYM-c02-1	Gh_A02G1254	UBP17	Ubiquitin carboxyl-terminal hydrolase 17	74283569	74290126
qSYM-c02-1	Gh_A02G1255	PIGG	GPI ethanolamine phosphate transferase 2	74291531	74302649
qSYM-c02-1	Gh_A02G1256	EIL4	Putative ETHYLENE INSENSITIVE 3-like 4 protein	74321882	74323399
qSYM-c02-1	Gh_A02G1257	IP5P5	Type I inositol polyphosphate 5-phosphatase 5	74402907	74411451
qSYM-c02-1	Gh_A02G1258	CCR1	Cinnamoyl-CoA reductase 1	74414238	74415349
qSYM-c02-1	Gh_A02G1259	gpmA	2,3-bisphosphoglycerate-dependent phosphoglycerate mutase	74415735	74419101
qSYM-c02-1	Gh_A02G1260	exgA	Glucan 1,3-beta-glucosidase A	74455157	74457240
qSYM-c02-1	Gh_A02G1261	exgA	Probable glucan 1,3-beta-glucosidase A	74476221	74481776
qSYM-c02-1	Gh_A02G1262	exgA	Glucan 1,3-beta-glucosidase A	74482820	74485006
qSYM-c02-1	Gh_A02G1263	fabZ	3-hydroxyacyl-[acyl-carrier-protein] dehydratase FabZ	74487678	74493160
qSYM-c02-1	Gh_A02G1264	NA	NA	74529872	74530610
qSYM-c02-1	Gh_A02G1265	NA	NA	74569304	74570130
qSYM-c02-1	Gh_A02G1266	Os03g0733400	Zinc finger BED domain-containing protein RICESLEEPER 2	74576117	74578517
qSYM-c02-1	Gh_A02G1267	NA	NA	74606733	74607095
qSYM-c02-1	Gh_A02G1268	NA	Inositol-3-phosphate synthase	74614634	74617431
qSYM-c02-1	Gh_A02G1269	ATJ20	Chaperone protein dnaJ 20, chloroplastic	74696904	74697401
qSYM-c02-1	Gh_A02G1270	NEN4	Protein NEN4	74764666	74765731
qSYM-c02-1	Gh_A02G1271	NA	NA	74767650	74768708
qSYM-c02-1	Gh_A02G1272	NA	L-ascorbate oxidase	74781472	74783399
qSYM-c02-1	Gh_A02G1273	HIPP26	Heavy metal-associated isoprenylated plant protein 26	74858261	74858819
qSYM-c02-1	Gh_A02G1274	Tsr3	Ribosome biogenesis protein TSR3 homolog	74904851	74909046
qSYM-c02-1	Gh_A02G1275	Acin1	Apoptotic chromatin condensation inducer in the nucleus	74912407	74915325
qSYM-c02-1	Gh_A02G1276	ACIN1	Apoptotic chromatin condensation inducer in the nucleus	74918186	74921249
qSYM-c02-1	Gh_A02G1277	NA	NA	74923422	74923658
qSYM-c02-1	Gh_A02G1278	RHA2A	E3 ubiquitin-protein ligase RHA2A	74962676	74963170
qSYM-c02-1	Gh_A02G1279	PRMT1	Probable protein arginine N-methyltransferase 1	75026848	75029266
qSYM-c02-1	Gh_A02G1280	NA	NA	75047394	75047636
qSYM-c02-1	Gh_A02G1281	GGT1	Gamma-glutamyltranspeptidase 1	75099880	75102118
qSYM-c02-1	Gh_A02G1282	GGT1	Gamma-glutamyltranspeptidase 1	75105305	75108105
qSYM-c02-1	Gh_A02G1283	GGT1	Gamma-glutamyltranspeptidase 1	75108130	75108429
qSYM-c02-1	Gh_A02G1284	GGT1	Gamma-glutamyltranspeptidase 1	75114657	75115505
qSYM-c02-1	Gh_A02G1285	sll1770	Uncharacterized protein sll1770	75156008	75170790
qSYM-c02-1	Gh_A02G1286	At5g10020	Probable inactive receptor kinase At5g10020	75192373	75198072
qSYM-c02-1	Gh_A02G1287	CPR5	Protein CPR-5	75198717	75202128
qSYM-c02-1	Gh_A02G1288	NFYB3	Nuclear transcription factor Y subunit B-3	75214741	75215454
qSYM-c02-1	Gh_A02G1289	NA	NA	75272640	75273521
qSYM-c02-1	Gh_A02G1290	NA	NA	75288857	75291004
qSYM-c02-1	Gh_A02G1291	NA	NA	75321743	75326882
qSYM-c02-1	Gh_A02G1292	2002-09-01	Stress enhanced protein 2, chloroplastic	75360814	75361502
qSYM-c02-1	Gh_A02G1293	DPE1	4-alpha-glucanotransferase DPE1, chloroplastic/amyloplastic	75380103	75385905
qSYM-c02-1	Gh_A02G1294	NA	NA	75386743	75390231
qSYM-c02-1	Gh_A02G1295	CYP78A7	Cytochrome P450 78A7	75497963	75499674
qSYM-c02-1	Gh_A02G1296	AHP5	Histidine-containing phosphotransfer protein 5	75535745	75536094
qSYM-c02-1	Gh_A02G1297	NA	NA	75553781	75554242
qSYM-c02-1	Gh_A02G1298	NA	NA	75587871	75589362
qSYM-c02-1	Gh_A02G1299	ABCF5	ABC transporter F family member 5	75613512	75617600
qSYM-c02-1	Gh_A02G1300	NA	NA	75618901	75619463
qSYM-c02-1	Gh_A02G1301	WRKY51	Probable WRKY transcription factor 51	75621065	75624523
qSYM-c02-1	Gh_A02G1302	UGT75L6	Crocetin glucosyltransferase, chloroplastic	75725680	75725946
qSYM-c02-1	Gh_A02G1303	VDE1	Violaxanthin de-epoxidase, chloroplastic	75728522	75730494
qSYM-c02-1	Gh_A02G1304	WRKY13	Probable WRKY transcription factor 13	75755053	75757400
qSYM-c02-1	Gh_A02G1305	CURL3	Brassinosteroid LRR receptor kinase	75794718	75798278
qSYM-c02-1	Gh_A02G1306	RABD2A	Ras-related protein RABD2a	75805278	75815841
qSYM-c02-1	Gh_A02G1307	UDP-GALT2	UDP-galactose transporter 2	75872521	75876568
qSYM-c02-1	Gh_A02G1308	NA	NA	75915926	75919071
qSYM-c02-1	Gh_A02G1309	NA	NA	75920433	75922862
qSYM-c02-1	Gh_A02G1310	NA	NA	75924397	75926234
qSYM-c02-1	Gh_A02G1311	NA	NA	76033082	76033440
qSYM-c02-1	Gh_A02G1312	ABR1	Ethylene-responsive transcription factor ABR1	76063456	76064721
qSYM-c02-1	Gh_A02G1313	RNR1	Ribonucleoside-diphosphate reductase large subunit	76080554	76085133
qSYM-c02-1	Gh_A02G1314	RBM39	RNA-binding protein 39	76097883	76103356
qSYM-c02-1	Gh_A02G1315	NA	NA	76112128	76112442
qSYM-c02-1	Gh_A02G1316	NA	NA	76136430	76138042
qSYM-c02-1	Gh_A02G1317	CESA6	Cellulose synthase A catalytic subunit 6 [UDP-forming]	76177061	76182844
qSYM-c02-1	Gh_A02G1318	ITPK2	Inositol-tetrakisphosphate 1-kinase 2	76224866	76225858
qSYM-c02-1	Gh_A02G1319	ZED1	Non-functional pseudokinase ZED1	76229463	76230485
qSYM-c02-1	Gh_A02G1320	CAD9	Probable cinnamyl alcohol dehydrogenase 9	76330077	76332945
qSYM-c02-1	Gh_A02G1321	At5g64700	WAT1-related protein At5g64700	76400448	76404594
qSYM-c02-1	Gh_A02G1322	Os01g0367900	Probable chromatin-remodeling complex ATPase chain	76407883	76409246
qSYM-c02-1	Gh_A02G1323	NA	NA	76438204	76438968
qSYM-c02-1	Gh_A02G1324	NA	NA	76440257	76441659
qSYM-c02-1	Gh_A02G1325	BOLA2	Protein BOLA2	76451670	76453883
qSYM-c02-1	Gh_A02G1326	XPO1	Protein EXPORTIN 1A	76481632	76482440
qSYM-c02-1	Gh_A02G1327	TIF3A1	Eukaryotic translation initiation factor 3 subunit A	76518225	76521634
qSYM-c02-1	Gh_A02G1328	Isy1	Pre-mRNA-splicing factor ISY1 homolog	76541563	76542462
qSYM-c02-1	Gh_A02G1329	NA	NA	76545145	76545885
qSYM-c02-1	Gh_A02G1330	PPC2	Phosphoenolpyruvate carboxylase 2	76614449	76616952
qSYM-c02-1	Gh_A02G1331	GH3.17	Indole-3-acetic acid-amido synthetase GH3.17	76626585	76629036
qSYM-c02-1	Gh_A02G1332	GH3.17	Indole-3-acetic acid-amido synthetase GH3.17	76634021	76637141
qSYM-c02-1	Gh_A02G1333	At3g05950	Germin-like protein subfamily 1 member 7	76743879	76744635
qSYM-c02-1	Gh_A02G1334	gph1	Phosphoglycolate phosphatase 1	76816257	76822729
qSYM-c02-1	Gh_A02G1335	EMB1270	Pentatricopeptide repeat-containing protein At3g18110, chloroplastic	76828463	76836135
qSYM-c02-1	Gh_A02G1336	NA	NA	77046798	77049210
qSYM-c02-1	Gh_A02G1337	NA	NA	77502016	77504316
qSYM-c02-1	Gh_A02G1338	NA	NA	77628630	77628863
qSYM-c02-1	Gh_A02G1339	NA	NA	77628961	77629356
qSYM-c02-1	Gh_A02G1340	NA	NA	77629820	77629990
qSYM-c02-1	Gh_A02G1341	UFGT	Anthocyanidin 3-O-glucosyltransferase 2	77646919	77648591
qSYM-c02-1	Gh_A02G1342	XPO1	Protein EXPORTIN 1A	77649480	77660833
qSYM-c02-1	Gh_A02G1343	SRC2	Protein SRC2 homolog	77737405	77738361
qSYM-c02-1	Gh_A02G1344	NA	4-coumarate--CoA ligase 2	77750949	77753835
qSYM-c02-1	Gh_A02G1345	CSLD3	Cellulose synthase-like protein D3	77847136	77851019
qSYM-c02-1	Gh_A02G1346	XTH22	Xyloglucan endotransglucosylase/hydrolase protein 22	77903568	77903852
qSYM-c02-1	Gh_A02G1347	XTH25	Probable xyloglucan endotransglucosylase/hydrolase protein 25	77904166	77904671
qSYM-c02-1	Gh_A02G1348	CER7	Protein ECERIFERUM 7	77940788	77946690
qSYM-c02-1	Gh_A02G1349	TOM1L2	TOM1-like protein 2	77969111	77971553
qSYM-c02-1	Gh_A02G1350	PTRH2	Peptidyl-tRNA hydrolase 2, mitochondrial	77986314	77990876
qSYM-c02-1	Gh_A02G1351	BPA1	Binding partner of ACD11 1	78010522	78013346
qSYM-c02-1	Gh_A02G1352	SYP21	Syntaxin-21	78053303	78055519
qSYM-c02-1	Gh_A02G1353	HSFA1B	Heat stress transcription factor A-1b	78074096	78077051
qSYM-c02-1	Gh_A02G1354	EXL6	Protein EXORDIUM-like 6	78117882	78118909
qSYM-c02-1	Gh_A02G1355	EXL6	Protein EXORDIUM-like 6	78121786	78122816
qSYM-c02-1	Gh_A02G1356	THO7B	THO complex subunit 7B	78199820	78201622
qSYM-c02-1	Gh_A02G1357	MYB39	Transcription factor MYB39	78204470	78205588
qSYM-c02-1	Gh_A02G1358	NA	NA	78265862	78266197
qSYM-c02-1	Gh_A02G1359	ITPK1	Inositol-tetrakisphosphate 1-kinase 1	78266809	78267735
qSYM-c02-1	Gh_A02G1360	NCS2	S-norcoclaurine synthase 2	78289677	78290235
qSYM-c02-1	Gh_A02G1361	NA	Histone H4	78413571	78413882
qSYM-c02-1	Gh_A02G1362	dnaJ	Chaperone protein DnaJ	78586100	78589336
qSYM-c02-1	Gh_A02G1363	At5g10290	Probable LRR receptor-like serine/threonine-protein kinase At5g10290	78623099	78629385
qSYM-c02-1	Gh_A02G1364	NA	NA	78631339	78631623
qSYM-c02-1	Gh_A02G1365	NA	NA	78639496	78639747
qSYM-c02-1	Gh_A02G1366	NA	NA	78680867	78681109
qSYM-c02-1	Gh_A02G1367	NA	NA	78711750	78712100
qSYM-c02-1	Gh_A02G1368	NA	NA	78716671	78717057
qSYM-c02-1	Gh_A02G1369	MYB39	Transcription factor MYB39	78725406	78726497
qSYM-c02-1	Gh_A02G1370	UBP3	Ubiquitin carboxyl-terminal hydrolase 3	78806425	78808686
qSYM-c02-1	Gh_A02G1371	At5g64970	Probable mitochondrial adenine nucleotide transporter BTL3	78809520	78812272
qSYM-c02-1	Gh_A02G1372	DOT3	BTB/POZ domain-containing protein DOT3	78837319	78840701
qSYM-c02-1	Gh_A02G1373	OXR1	Oxidation resistance protein 1	78842892	78845134
qSYM-c02-1	Gh_A02G1374	ABCC1	ABC transporter D family member 1	78849738	78859107
qSYM-c02-1	Gh_A02G1375	NA	NA	78871762	78873198
qSYM-c02-1	Gh_A02G1376	NA	NA	78886279	78887619
qSYM-c02-1	Gh_A02G1377	At3g63000	NPL4-like protein 1	78953846	78955129
qSYM-c02-1	Gh_A02G1378	HCC2	Protein SCO1 homolog 2, mitochondrial	78957704	78960521
qSYM-c02-1	Gh_A02G1379	NA	NA	78960989	78961575
qSYM-c02-1	Gh_A02G1380	NA	NA	78963443	78964258
qSYM-c02-1	Gh_A02G1381	TPPJ	Probable trehalose-phosphate phosphatase J	78975161	78977298
qSYM-c02-1	Gh_A02G1382	ERF060	Ethylene-responsive transcription factor ERF060	79057172	79058194
qSYM-c02-1	Gh_A02G1383	NA	NA	79073259	79076472
qSYM-c02-1	Gh_A02G1384	At1g04910	Uncharacterized protein At1g04910	79090840	79094313
qSYM-c02-1	Gh_A02G1385	MSL2	Mechanosensitive ion channel protein 2, chloroplastic	79095254	79104889
qSYM-c02-1	Gh_A02G1386	NA	NA	79113488	79114159
qSYM-c02-1	Gh_A02G1387	NET2D	Protein NETWORKED 2D	79117995	79120709
qSYM-c02-1	Gh_A02G1388	NIC1	Nicotinamidase 1	79121083	79122350
qSYM-c02-1	Gh_A02G1389	At5g65490	Protein ecdysoneless homolog	79123491	79126550
qSYM-c02-1	Gh_A02G1390	SKIP34	Protein SKIP34	79132535	79132813
qSYM-c02-1	Gh_A02G1391	PUB50	Putative U-box domain-containing protein 50	79134352	79138123
qSYM-c02-1	Gh_A02G1392	AIL6	AP2-like ethylene-responsive transcription factor AIL6	79153245	79156171
qSYM-c02-1	Gh_A02G1393	RBK1	Receptor-like cytosolic serine/threonine-protein kinase RBK1	79159046	79160937
qSYM-c02-1	Gh_A02G1394	At5g03795	Probable glycosyltransferase At5g03795	79165771	79168327
qSYM-c02-1	Gh_A02G1395	NA	NA	79171077	79171319
qSYM-c02-1	Gh_A02G1396	At2g29880	Uncharacterized protein At2g29880	79174540	79175588
qSYM-c02-1	Gh_A02G1397	DOF5.7	Dof zinc finger protein DOF5.7	79220339	79221271
qSYM-c02-1	Gh_A02G1398	CAD	Probable mannitol dehydrogenase	79232504	79235179
qSYM-c02-1	Gh_A02G1399	rhiE	Rhamnogalacturonate lyase	79236413	79241107
qSYM-c02-1	Gh_A02G1400	LECRK91	L-type lectin-domain containing receptor kinase IX.1	79414985	79417015
qSYM-c02-1	Gh_A02G1401	SHM1	Serine hydroxymethyltransferase 1, mitochondrial	79450004	79451608
qSYM-c02-1	Gh_A02G1402	GRDP1	Glycine-rich domain-containing protein 1	79550736	79554562
qSYM-c02-1	Gh_A02G1403	NA	NA	79570552	79571082
qSYM-c02-1	Gh_A02G1404	BHLH93	Transcription factor bHLH93	79623484	79624741
qSYM-c02-1	Gh_A02G1405	NA	NA	79626055	79628598
qSYM-c02-1	Gh_A02G1406	IAA9	Auxin-responsive protein IAA9	79636317	79638769
qSYM-c02-1	Gh_A02G1407	NA	NA	79662248	79664345
qSYM-c02-1	Gh_A02G1408	rmnd5a	Protein RMD5 homolog A	79692212	79693357
qSYM-c02-1	Gh_A02G1409	DUS2	tRNA-dihydrouridine(20) synthase [NAD(P)+]-like	79697920	79702390
qSYM-c02-1	Gh_A02G1410	PCKA	Phosphoenolpyruvate carboxykinase [ATP]	79741131	79751673
qSYM-c02-1	Gh_A02G1411	SPTY2D1	Protein SPT2 homolog	79765114	79768842
qSYM-c02-1	Gh_A02G1412	SS4	Probable starch synthase 4, chloroplastic/amyloplastic	79796081	79804950
qSYM-c02-1	Gh_A02G1413	At2g22730	Probable sphingolipid transporter spinster homolog 3	79808101	79812596
qSYM-c02-1	Gh_A02G1414	BHLH25	Transcription factor bHLH25	79815325	79817184
qSYM-c02-1	Gh_A02G1415	BHLH25	Transcription factor bHLH25	79849328	79850543
qSYM-c02-1	Gh_A02G1416	BAM1	Leucine-rich repeat receptor-like serine/threonine-protein kinase BAM1	79866573	79869921
qSYM-c02-1	Gh_A02G1417	BAM1	Leucine-rich repeat receptor-like serine/threonine-protein kinase BAM1	79892341	79896411
qSYM-c02-1	Gh_A02G1418	NA	Malate dehydrogenase, glyoxysomal	79906521	79909050
qSYM-c02-1	Gh_A02G1419	HSL2	LRR receptor-like serine/threonine-protein kinase HSL2	79926988	79930136
qSYM-c02-1	Gh_A02G1420	NA	NA	79964473	79965561
qSYM-c02-1	Gh_A02G1421	COX6A	Cytochrome c oxidase subunit 6a, mitochondrial	79970532	79972692
qSYM-c02-1	Gh_A02G1422	NA	NA	79979362	79981794
qSYM-c02-1	Gh_A02G1423	NA	NA	79994278	79994858
qSYM-c02-1	Gh_A02G1424	At5g47360	Pentatricopeptide repeat-containing protein At5g47360	80020098	80022539
qSYM-c02-1	Gh_A02G1425	At5g47360	Pentatricopeptide repeat-containing protein At5g47360	80022543	80023295
qSYM-c02-1	Gh_A02G1426	XTH6	Probable xyloglucan endotransglucosylase/hydrolase protein 6	80044015	80045125
qSYM-c02-1	Gh_A02G1427	FANCL	E3 ubiquitin-protein ligase FANCL	80047345	80050764
qSYM-c02-1	Gh_A02G1428	HAT22	Homeobox-leucine zipper protein HAT22	80067276	80068185
qSYM-c02-1	Gh_A02G1429	PRCP	Lysosomal Pro-X carboxypeptidase	80076912	80080508
qSYM-c02-1	Gh_A02G1430	CRWN4	Protein CROWDED NUCLEI 4	80082769	80087901
qSYM-c02-1	Gh_A02G1431	ACS2	1-aminocyclopropane-1-carboxylate synthase CMA101	80092255	80094570
qSYM-c02-1	Gh_A02G1432	At3g49720	Uncharacterized protein At3g49720	80099970	80102352
qSYM-c02-1	Gh_A02G1433	At3g49720	Uncharacterized protein At3g49720	80103827	80105852
qSYM-c02-1	Gh_A02G1434	CBSDUF3	DUF21 domain-containing protein At2g14520	80110018	80112244
qSYM-c02-1	Gh_A02G1435	At5g65820	Putative pentatricopeptide repeat-containing protein At5g65820	80112916	80114826
qSYM-c02-1	Gh_A02G1436	NA	Squalene monooxygenase	80116295	80119206
qSYM-c02-1	Gh_A02G1437	At1g69990	Probable LRR receptor-like serine/threonine-protein kinase At1g69990	80136784	80137593
qSYM-c02-1	Gh_A02G1438	GRF1	Growth-regulating factor 1	80257374	80259722
qSYM-c02-1	Gh_A02G1439	NA	NA	80262353	80262814
qSYM-c02-1	Gh_A02G1440	BZIP43	Basic leucine zipper 43	80269516	80270079
qSYM-c02-1	Gh_A02G1441	NA	NA	80291575	80293973
qSYM-c02-1	Gh_A02G1442	PSK3	Phytosulfokines 3	80322837	80323176
qSYM-c02-1	Gh_A02G1443	ACR1	ACT domain-containing protein ACR1	80346872	80351043
qSYM-c02-1	Gh_A02G1444	NA	NA	80351216	80354338
qSYM-c02-1	Gh_A02G1445	NA	NA	80415946	80416401
qSYM-c02-1	Gh_A02G1446	HHP4	Heptahelical transmembrane protein 4	80444419	80447458
qSYM-c02-1	Gh_A02G1447	NA	NA	80521674	80523863
qSYM-c02-1	Gh_A02G1448	Os06g0170500	Zinc finger CCCH domain-containing protein 40	80527180	80530184
qSYM-c02-1	Gh_A02G1449	NAGS2	Probable amino-acid acetyltransferase NAGS2, chloroplastic	80534803	80546883
qSYM-c02-1	Gh_A02G1450	Arl8b	ADP-ribosylation factor-like protein 8B	80548420	80550427
qSYM-c02-1	Gh_A02G1451	NA	NA	80553662	80553814
qSYM-c02-1	Gh_A02G1452	NA	NA	80557491	80559652
qSYM-c02-1	Gh_A02G1453	SHR	Protein SHORT-ROOT	80565269	80566846
qSYM-c02-1	Gh_A02G1454	At5g40230	WAT1-related protein At5g40230	80580185	80581901
qSYM-c02-1	Gh_A02G1455	APK1	Adenylyl-sulfate kinase 1, chloroplastic	80586427	80589500
qSYM-c02-1	Gh_A02G1456	RPL26A	60S ribosomal protein L26-1	80600358	80600798
qSYM-c02-1	Gh_A02G1457	ACA2	Calcium-transporting ATPase 2, plasma membrane-type	80607525	80611642
qSYM-c02-1	Gh_A02G1458	CYCD5-1	Cyclin-D5-1	80627569	80630351
qSYM-c02-1	Gh_A02G1459	BT4	BTB/POZ and TAZ domain-containing protein 4	80643480	80645826
qSYM-c02-1	Gh_A02G1460	NA	NA	80649947	80652235
qSYM-c02-1	Gh_A02G1461	NPY2	BTB/POZ domain-containing protein NPY2	80673606	80676133
qSYM-c02-1	Gh_A02G1462	At2g23060	Probable N-acetyltransferase HLS1-like	80694462	80695896
qSYM-c02-1	Gh_A02G1463	At2g23070	Casein kinase II subunit alpha, chloroplastic	80725709	80738929
qSYM-c02-1	Gh_A02G1464	NA	NA	80741824	80742909
qSYM-c02-1	Gh_A02G1465	NA	NA	80766801	80768252
qSYM-c02-1	Gh_A02G1466	PER73	Peroxidase 73	80770103	80772880
qSYM-c02-1	Gh_A02G1467	NA	NA	80797389	80798079
qSYM-c02-1	Gh_A02G1468	At2g23090	Uncharacterized protein At2g23090	80799675	80802748
qSYM-c02-1	Gh_A02G1469	dnaJ	Chaperone protein DnaJ	80803142	80806657
qSYM-c02-1	Gh_A02G1470	NA	NA	80811389	80812348
qSYM-c02-1	Gh_A02G1471	D14L	Probable esterase D14L	80827071	80827979
qSYM-c02-1	Gh_A02G1472	Ddb2	DNA damage-binding protein 2	80838029	80841897
qSYM-c02-1	Gh_A02G1473	GASA7	Gibberellin-regulated protein 7	80845108	80845556
qSYM-c02-1	Gh_A02G1474	NA	NA	80846184	80848574
qSYM-c02-1	Gh_A02G1475	PUB4	U-box domain-containing protein 4	80851812	80859254
qSYM-c02-1	Gh_A02G1476	At1g65240	Aspartic proteinase-like protein 2	80887405	80890936
qSYM-c02-1	Gh_A02G1477	NRAMP3	Metal transporter Nramp3	80916561	80919093
qSYM-c02-1	Gh_A02G1478	Tbl1xr1	F-box-like/WD repeat-containing protein TBL1XR1	80931089	80937543
qSYM-c02-1	Gh_A02G1479	CYP81E8	Cytochrome P450 81E8	80939084	80942515
qSYM-c02-1	Gh_A02G1480	At5g24010	Probable receptor-like protein kinase At5g24010	80944799	80947210
qSYM-c02-1	Gh_A02G1481	At4g37250	Probable LRR receptor-like serine/threonine-protein kinase At4g37250	80966192	80969113
qSYM-c02-1	Gh_A02G1482	EB1C	Microtubule-associated protein RP/EB family member 1C	80971239	80972984
qSYM-c02-1	Gh_A02G1483	CYCD3-2	Cyclin-D3-2	80978742	80980079
qSYM-c02-1	Gh_A02G1484	SKIP2	F-box protein SKIP2	80993553	80995574
qSYM-c02-1	Gh_A02G1485	RER1A	Protein RER1A	80996977	80998935
qSYM-c02-1	Gh_A02G1486	IRX14H	Probable beta-1,4-xylosyltransferase IRX14H	81001392	81003511
qSYM-c02-1	Gh_A02G1487	PUB4	U-box domain-containing protein 4	81012479	81013465
qSYM-c02-1	Gh_A02G1488	WRKY15	Probable WRKY transcription factor 15	81025465	81026529
qSYM-c02-1	Gh_A02G1489	DUS1L	tRNA-dihydrouridine(16/17) synthase [NAD(P)(+)]-like	81031005	81032665
qSYM-c02-1	Gh_A02G1490	At3g50210	Probable 2-oxoglutarate-dependent dioxygenase At3g49630	81034363	81036978
qSYM-c02-1	Gh_A02G1491	At5g67200	Probable inactive receptor kinase At5g67200	81050018	81052920
qSYM-c02-1	Gh_A02G1492	FRA1	Kinesin-like protein FRA1	81054442	81063033
qSYM-c02-1	Gh_A02G1493	ERF010	Ethylene-responsive transcription factor ERF010	81094556	81095071
qSYM-c02-1	Gh_A02G1494	CBSX1	CBS domain-containing protein CBSX1, chloroplastic	81101599	81105033
qSYM-c02-1	Gh_A02G1495	AP2	Floral homeotic protein APETALA 2	81159598	81161942
qSYM-c02-1	Gh_A02G1496	At5g39020	Probable receptor-like protein kinase At5g39020	81173136	81175802
qSYM-c02-1	Gh_A02G1497	FPP7	Filament-like plant protein 7	81178194	81181654
qSYM-c02-1	Gh_A02G1498	At5g67130	PI-PLC X domain-containing protein At5g67130	81182639	81186118
qSYM-c02-1	Gh_A02G1499	At5g67140	F-box protein At5g67140	81186299	81187555
qSYM-c02-1	Gh_A02G1500	mkkA	Mitogen-activated protein kinase kinase kinase A	81194530	81195546
qSYM-c02-1	Gh_A02G1501	MED23	Mediator of RNA polymerase II transcription subunit 23	81199318	81200756
qSYM-c02-1	Gh_A02G1502	HEC2	Transcription factor HEC2	81211553	81212236
qSYM-c02-1	Gh_A02G1503	NA	NA	81221262	81222458
qSYM-c02-1	Gh_A02G1504	Clasrp	CLK4-associating serine/arginine rich protein	81233232	81236626
qSYM-c02-1	Gh_A02G1505	GLR3.2	Glutamate receptor 3.2	81274360	81275381
qSYM-c02-1	Gh_A02G1506	NA	NA	81293340	81293783
qSYM-c02-1	Gh_A02G1507	CYP83B1	Cytochrome P450 83B1	81300888	81302472
qSYM-c02-1	Gh_A02G1508	CYP83B1	Cytochrome P450 83B1	81325763	81332357
qSYM-c02-1	Gh_A02G1509	CYP83B1	Cytochrome P450 83B1	81362350	81363677
qSYM-c02-1	Gh_A02G1510	HSF24	Heat shock factor protein HSF24	81404427	81405938
qSYM-c02-1	Gh_A02G1511	Exosc8	Exosome complex component RRP43	81595553	81599187
qSYM-c02-1	Gh_A02G1512	ERF114	Ethylene-responsive transcription factor ERF114	81608477	81609043
qSYM-c02-1	Gh_A02G1513	CML1	Calmodulin-like protein 1	81612102	81612548
qSYM-c02-1	Gh_A02G1514	CNR1	Cell number regulator 1	81612819	81615141
qSYM-c02-1	Gh_A02G1515	NA	NA	81623494	81627822
qSYM-c02-1	Gh_A02G1516	nodH	Nodulation protein H	81632276	81634774
qSYM-c02-1	Gh_A02G1517	VAL3	B3 domain-containing transcription factor VAL3	81642834	81643187
qSYM-c02-1	Gh_A02G1518	NA	NA	81646443	81646925
qSYM-c02-1	Gh_A02G1519	NA	NA	81649412	81650372
qSYM-c02-1	Gh_A02G1520	NA	NA	81660665	81661111
qSYM-c02-1	Gh_A02G1521	NA	NA	81662600	81662884
qSYM-c02-1	Gh_A02G1522	NA	NA	81665057	81665341
qSYM-c02-1	Gh_A02G1523	NA	NA	81689302	81689793
qSYM-c02-1	Gh_A02G1524	NA	NA	81695089	81695355
qSYM-c02-1	Gh_A02G1525	PLP2	Patatin-like protein 2	81705878	81708783
qSYM-c02-1	Gh_A02G1526	CYP40	Peptidyl-prolyl cis-trans isomerase CYP40	81709328	81717486
qSYM-c02-1	Gh_A02G1527	VRN1	B3 domain-containing transcription factor VRN1	81749189	81751402
qSYM-c02-1	Gh_A02G1528	RUS4	Protein root UVB sensitive 4	81752368	81755594
qSYM-c02-1	Gh_A02G1529	XLG1	Extra-large guanine nucleotide-binding protein 1	81756106	81760994
qSYM-c02-1	Gh_A02G1530	WDR5A	COMPASS-like H3K4 histone methylase component WDR5A	81763087	81764613
qSYM-c02-1	Gh_A02G1531	NA	NA	81766705	81768429
qSYM-c02-1	Gh_A02G1532	WAKL14	Wall-associated receptor kinase-like 14	81778136	81781307
qSYM-c02-1	Gh_A02G1533	NA	NA	81783099	81783563
qSYM-c02-1	Gh_A02G1534	NA	Histone-binding protein N1/N2	81784413	81786733
qSYM-c02-1	Gh_A02G1535	At5g66560	BTB/POZ domain-containing protein At5g66560	81790877	81793179
qSYM-c03-2	Gh_A03G0051	RBP47	Polyadenylate-binding protein RBP47	769527	813228
qSYM-c03-2	Gh_A03G0052	At5g01020	Serine/threonine-protein kinase At5g01020	814712	816907
qSYM-c03-2	Gh_A03G0053	CSN8	COP9 signalosome complex subunit 8	835589	837742
qSYM-c03-2	Gh_A03G0054	GATA26	GATA transcription factor 26	840048	843706
qSYM-c03-2	Gh_A03G0055	PVA21	Vesicle-associated protein 2-1	859673	864206
qSYM-c03-2	Gh_A03G0056	At4g17560	50S ribosomal protein L19-1, chloroplastic	866936	869360
qSYM-c03-2	Gh_A03G0057	NA	NA	874446	874898
qSYM-c03-2	Gh_A03G0058	NA	NA	877564	879755
qSYM-c03-2	Gh_A03G0059	At5g02620	Ankyrin repeat-containing protein At5g02620	881404	881913
qSYM-c03-2	Gh_A03G0060	SEOB	Protein SIEVE ELEMENT OCCLUSION B	896958	899515
qSYM-c03-2	Gh_A03G0061	SEOB	Protein SIEVE ELEMENT OCCLUSION B	926936	965709
qSYM-c03-2	Gh_A03G0062	pqsH	2-heptyl-3-hydroxy-4(1H)-quinolone synthase	1009746	1011717
qSYM-c03-2	Gh_A03G0063	YPTM2	GTP-binding protein YPTM2	1015655	1017339
qSYM-c03-2	Gh_A03G0064	At4g16820	Phospholipase A1-Ibeta2, chloroplastic	1018637	1020115
qSYM-c03-2	Gh_A03G0065	VRN2	Polycomb group protein VERNALIZATION 2	1028419	1037603
qSYM-c03-2	Gh_A03G0066	ERF5	Ethylene-responsive transcription factor 5	1040485	1041432
qSYM-c03-2	Gh_A03G0067	NUDT8	Nudix hydrolase 8	1046841	1055205
qSYM-c03-2	Gh_A03G0068	At4g17486	DeSI-like protein At4g17486	1059686	1061929
qSYM-c03-2	Gh_A03G0069	ATL21A	Putative RING-H2 finger protein ATL21A	1065341	1066860
qSYM-c03-2	Gh_A03G0070	NA	NA	1071411	1072367
qSYM-c03-2	Gh_A03G0071	NA	NA	1073523	1074948
qSYM-c03-2	Gh_A03G0072	NA	NA	1084131	1085047
qSYM-c03-2	Gh_A03G0073	NA	NA	1086280	1089998
qSYM-c03-2	Gh_A03G0074	HOS1	E3 ubiquitin-protein ligase HOS1	1098392	1102552
qSYM-c03-2	Gh_A03G0075	NA	Transcription factor MYB1R1	1105666	1107277
qSYM-c03-2	Gh_A03G0076	NA	NA	1108323	1110887
qSYM-c03-2	Gh_A03G0077	ERF038	Ethylene-responsive transcription factor ERF038	1114979	1115623
qSYM-c03-2	Gh_A03G0078	NA	NA	1136579	1147824
qSYM-c03-2	Gh_A03G0079	NA	NA	1149543	1152280
qSYM-c03-2	Gh_A03G0080	NA	NA	1166045	1171493
qSYM-c03-2	Gh_A03G0081	PSD1	Phosphatidylserine decarboxylase proenzyme 1, mitochondrial	1260515	1267590
qSYM-c03-2	Gh_A03G0082	VAB	VAN3-binding protein	1268430	1272750
qSYM-c03-2	Gh_A03G0083	TIP2-3	Aquaporin TIP2-3	1285396	1287294
qSYM-c03-2	Gh_A03G0084	SEC16B	Protein transport protein SEC16B homolog	1302533	1308892
qSYM-c03-2	Gh_A03G0085	At1g12300	Pentatricopeptide repeat-containing protein At1g12300, mitochondrial	1310395	1312206
qSYM-c03-2	Gh_A03G0086	PEX19-1	Peroxisome biogenesis protein 19-1	1313244	1314557
qSYM-c03-2	Gh_A03G0087	PME68	Probable pectinesterase 68	1316481	1319633
qSYM-c03-2	Gh_A03G0088	NA	NA	1324905	1325276
qSYM-c03-2	Gh_A03G0089	ATJ13	Chaperone protein dnaJ 13	1331283	1336153
qSYM-c03-2	Gh_A03G0090	PRMT16	Protein arginine N-methyltransferase 1.6	1337245	1341583
qSYM-c03-2	Gh_A03G0091	nep2	Aspartic proteinase nepenthesin-2	1352696	1354159
qSYM-c03-2	Gh_A03G0092	PVA12	Vesicle-associated protein 1-2	1358752	1360881
qSYM-c03-2	Gh_A03G0093	SCL6	Scarecrow-like protein 6	1376148	1378031
qSYM-c03-2	Gh_A03G0094	ATG8F	Autophagy-related protein 8f	1408721	1410200
qSYM-c03-2	Gh_A03G0095	NA	L-lactate dehydrogenase B (Fragment)	1414541	1416567
qSYM-c03-2	Gh_A03G0096	NPF6.3	Protein NRT1/ PTR FAMILY 6.3	1429690	1432937
qSYM-c03-2	Gh_A03G0097	NPF6.3	Protein NRT1/ PTR FAMILY 6.3	1446195	1470222
qSYM-c03-2	Gh_A03G0098	ORP2A	Oxysterol-binding protein-related protein 2A	1481822	1499837
qSYM-c03-2	Gh_A03G0099	NA	NA	1547215	1548078
qSYM-c03-2	Gh_A03G0100	At1g62620	Flavin-containing monooxygenase FMO GS-OX-like 3	1555524	1557725
qSYM-c03-2	Gh_A03G0101	NA	NA	1561178	1562149
qSYM-c03-2	Gh_A03G0102	HSP70	Heat shock 70 kDa protein	1567909	1568409
qSYM-c03-2	Gh_A03G0103	ZPR2	Protein LITTLE ZIPPER 2	1583668	1584071
qSYM-c03-2	Gh_A03G0104	SAP1	Zinc finger A20 and AN1 domain-containing stress-associated protein 1	1621267	1621767
qSYM-c03-2	Gh_A03G0105	AHL24	AT-hook motif nuclear-localized protein 24	1629481	1630410
qSYM-c03-2	Gh_A03G0106	RGA3	Putative disease resistance protein RGA3	1659191	1671332
qSYM-c03-2	Gh_A03G0107	NA	NA	1673013	1673863
qSYM-c03-2	Gh_A03G0108	RGA2	Disease resistance protein RGA2	1677257	1682357
qSYM-c03-2	Gh_A03G0109	ESAG8	Putative adenylate cyclase regulatory protein	1693823	1696949
qSYM-c03-2	Gh_A03G0110	RGA2	Disease resistance protein RGA2	1701429	1702787
qSYM-c03-2	Gh_A03G0111	CDC20-1	Cell division cycle 20.1, cofactor of APC complex	1704732	1706146
qSYM-c03-2	Gh_A03G0112	RGA2	Disease resistance protein RGA2	1733453	1737861
qSYM-c03-2	Gh_A03G0113	DTX56	Protein DETOXIFICATION 56	1785525	1787024
qSYM-c03-2	Gh_A03G0114	DTX56	Protein DETOXIFICATION 56	1792046	1793545
qSYM-c03-2	Gh_A03G0115	CLPT2	ATP-dependent Clp protease ATP-binding subunit CLPT2, chloroplastic	1793990	1796327
qSYM-c03-2	Gh_A03G0116	ACR8	ACT domain-containing protein ACR8	1809874	1811808
qSYM-c03-2	Gh_A03G0117	AHL1	AT-hook motif nuclear-localized protein 1	1824977	1827152
qSYM-c03-2	Gh_A03G0118	At1g12340	Probable protein cornichon homolog 2	1829951	1832247
qSYM-c03-2	Gh_A03G0119	NA	NA	1847330	1849678
qSYM-c03-2	Gh_A03G0120	PHR1	Deoxyribodipyrimidine photo-lyase	1871238	1873553
qSYM-c03-2	Gh_A03G0121	NA	NA	1897260	1897517
qSYM-c03-2	Gh_A03G0122	PLIM2C	LIM domain-containing protein PLIM2c	1905135	1905582
qSYM-c03-2	Gh_A03G0123	NA	NA	1912996	1921492
qSYM-c03-2	Gh_A03G0124	At1g63430	Probable LRR receptor-like serine/threonine-protein kinase At1g63430	1936294	1960902
qSYM-c03-2	Gh_A03G0125	ADF10	Actin-depolymerizing factor 10	1962483	1963066
qSYM-c03-2	Gh_A03G0126	NA	Tubulin beta-9 chain	1967973	1970411
qSYM-c03-2	Gh_A03G0127	TUBB1	Tubulin beta-1 chain	1975998	1977691
qSYM-c03-2	Gh_A03G0128	TBL19	Protein trichome birefringence-like 19	1982613	1984853
qSYM-c03-2	Gh_A03G0129	NA	Tubulin beta-7 chain	1989463	1991699
qSYM-c03-2	Gh_A03G0130	TM_1254	Phosphorylated carbohydrates phosphatase TM_1254	2006442	2007584
qSYM-c03-2	Gh_A03G0131	NA	NA	2026465	2028742
qSYM-c03-2	Gh_A03G0132	KP1	Kinesin KP1	2042734	2049259
qSYM-c03-2	Gh_A03G0133	NA	NA	2067057	2067254
qSYM-c03-2	Gh_A03G0134	NA	NA	2067810	2069835
qSYM-c03-2	Gh_A03G0135	guaA	GMP synthase [glutamine-hydrolyzing]	2070907	2074123
qSYM-c03-2	Gh_A03G0136	murE	UDP-N-acetylmuramoyl-L-alanyl-D-glutamate--2,6-diaminopimelate ligase	2078922	2083283
qSYM-c03-2	Gh_A03G0137	SPPL2	Signal peptide peptidase-like 2	2092414	2096991
qSYM-c03-2	Gh_A03G0138	PIP1-2	Probable aquaporin PIP1-2	2100449	2102424
qSYM-c03-2	Gh_A03G0139	TIC32	Short-chain dehydrogenase TIC 32, chloroplastic	2104137	2105857
qSYM-c03-2	Gh_A03G0140	At5g50100	Uncharacterized protein At5g50100, mitochondrial	2106272	2106905
qSYM-c03-2	Gh_A03G0141	At1g76660	Uncharacterized protein At1g76660	2184199	2187239
qSYM-c03-2	Gh_A03G0142	MPA1	Puromycin-sensitive aminopeptidase	2197252	2204306
qSYM-c03-2	Gh_A03G0143	UBC5	Ubiquitin-conjugating enzyme E2 5	2218596	2221512
qSYM-c03-2	Gh_A03G0144	At3g02290	E3 ubiquitin-protein ligase At3g02290	2227495	2228891
qSYM-c03-2	Gh_A03G0145	ACA2	Calcium-transporting ATPase 2, plasma membrane-type	2233598	2237261
qSYM-c03-2	Gh_A03G0146	NA	NA	2239370	2241750
qSYM-c03-2	Gh_A03G0147	BETAC-AD	Beta-adaptin-like protein C	2256103	2262437
qSYM-c03-2	Gh_A03G0148	XPB1	DNA repair helicase XPB1	2278182	2283756
qSYM-c03-2	Gh_A03G0149	rpoC2	DNA-directed RNA polymerase subunit beta''	2285336	2289831
qSYM-c03-2	Gh_A03G0150	ycf3	Photosystem I assembly protein Ycf3	2290534	2290710
qSYM-c03-2	Gh_A03G0151	NA	NA	2293229	2293529
qSYM-c03-2	Gh_A03G0152	NA	NA	2295080	2299583
qSYM-c03-2	Gh_A03G0153	RHA1B	E3 ubiquitin-protein ligase RHA1B	2323621	2323896
qSYM-c03-2	Gh_A03G0154	NA	NA	2327954	2328274
qSYM-c03-2	Gh_A03G0155	NA	NA	2357924	2358109
qSYM-c03-2	Gh_A03G0156	B3GALT11	Probable beta-1,3-galactosyltransferase 11	2369035	2372714
qSYM-c03-2	Gh_A03G0157	At1g63850	BTB/POZ domain-containing protein At1g63850	2376361	2378436
qSYM-c03-2	Gh_A03G0158	BEL1	Homeobox protein BEL1 homolog	2409356	2412489
qSYM-c03-2	Gh_A03G0159	NA	NA	2434994	2437421
qSYM-c03-2	Gh_A03G0160	NA	NA	2448262	2448465
qSYM-c03-2	Gh_A03G0161	NA	NA	2450819	2451019
qSYM-c03-2	Gh_A03G0162	GSVIVT00026920001	Probable polygalacturonase	2475281	2477060
qSYM-c03-2	Gh_A03G0163	MPK4	Mitogen-activated protein kinase 4	2477461	2480961
qSYM-c03-2	Gh_A03G0164	HSP83A	Heat shock protein 83	2491019	2494057
qSYM-c03-2	Gh_A03G0165	RPS10A	40S ribosomal protein S10-1	2495538	2497177
qSYM-c03-2	Gh_A03G0166	MYB86	Transcription factor MYB86	2501201	2502681
qSYM-c03-2	Gh_A03G0167	NA	NA	2523613	2524791
qSYM-c03-2	Gh_A03G0168	R1A-3	Putative late blight resistance protein homolog R1A-3	2537783	2538369
qSYM-c03-2	Gh_A03G0169	POPTRDRAFT_831870	Biotin carboxylase 1, chloroplastic	2551062	2559237
qSYM-c03-2	Gh_A03G0170	NA	NA	2559825	2561621
qSYM-c03-2	Gh_A03G0171	ORP4C	Oxysterol-binding protein-related protein 4C	2570968	2573184
qSYM-c03-2	Gh_A03G0172	NA	NA	2589775	2589978
qSYM-c03-2	Gh_A03G0173	DTC	Mitochondrial dicarboxylate/tricarboxylate transporter DTC	2597498	2602161
qSYM-c03-2	Gh_A03G0174	PURA1	Transcription factor Pur-alpha 1	2602501	2612085
qSYM-c03-2	Gh_A03G0175	NA	NA	2623935	2625019
qSYM-c03-2	Gh_A03G0176	At3g19950	E3 ubiquitin-protein ligase RING1-like	2643485	2644579
qSYM-c03-2	Gh_A03G0177	NA	Pyruvate kinase, cytosolic isozyme	2648056	2650508
qSYM-c03-2	Gh_A03G0178	SBT3.5	Subtilisin-like protease SBT3.5	2656827	2660883
qSYM-c03-2	Gh_A03G0179	At5g56460	Probable receptor-like protein kinase At5g56460	2677292	2682993
qSYM-c03-2	Gh_A03G0180	NA	NA	2691884	2692768
qSYM-c03-2	Gh_A03G0181	DEK1	Calpain-type cysteine protease DEK1	2694063	2710759
qSYM-c03-2	Gh_A03G0182	RBCS	Ribulose bisphosphate carboxylase small chain, chloroplastic	2721785	2722506
qSYM-c03-2	Gh_A03G0183	At5g57670	Probable receptor-like serine/threonine-protein kinase At5g57670	2734620	2736944
qSYM-c03-2	Gh_A03G0184	ycf54	Uncharacterized protein ycf54	2781105	2783693
qSYM-c03-2	Gh_A03G0185	GE24275	MAU2 chromatid cohesion factor homolog	2784691	2793408
qSYM-c03-2	Gh_A03G0186	ABCB25	ABC transporter B family member 25, mitochondrial	2801761	2812837
qSYM-c03-2	Gh_A03G0187	At5g58300	Probable inactive receptor kinase At5g58300	2835053	2837169
qSYM-c03-2	Gh_A03G0188	MES17	Methylesterase 17	2840639	2842376
qSYM-c03-2	Gh_A03G0189	VAL1	B3 domain-containing transcription repressor VAL1	2849424	2855673
qSYM-c03-2	Gh_A03G0190	NA	NA	2857641	2858880
qSYM-c03-2	Gh_A03G0191	IDE	Insulin-degrading enzyme	2873644	2881979
qSYM-c03-2	Gh_A03G0192	EPFL6	EPIDERMAL PATTERNING FACTOR-like protein 6	2902776	2904042
qSYM-c03-2	Gh_A03G0193	CIPK11	CBL-interacting serine/threonine-protein kinase 11	2913594	2914817
qSYM-c03-2	Gh_A03G0194	engB	Probable GTP-binding protein EngB	2918603	2922479
qSYM-c03-2	Gh_A03G0195	NA	NA	2925528	2925849
qSYM-c03-2	Gh_A03G0196	CIPK10	CBL-interacting serine/threonine-protein kinase 10	2928617	2930047
qSYM-c03-2	Gh_A03G0197	NA	NA	2954798	2955379
qSYM-c03-2	Gh_A03G0198	LBD15	LOB domain-containing protein 15	3035147	3036082
qSYM-c03-2	Gh_A03G0199	GSVIVT00023967001	Peroxidase 4	3093785	3095982
qSYM-c03-2	Gh_A03G0200	GSVIVT00023967001	Peroxidase 4	3102427	3103937
qSYM-c03-2	Gh_A03G0201	BLOS1	Biogenesis of lysosome-related organelles complex 1 subunit 1	3106378	3106986
qSYM-c03-2	Gh_A03G0202	TIC110	Protein TIC110, chloroplastic	3108929	3115011
qSYM-c03-2	Gh_A03G0203	At2g30320	Putative tRNA pseudouridine synthase	3133703	3136317
qSYM-c03-2	Gh_A03G0204	RDM4	RNA-directed DNA methylation 4	3139395	3142384
qSYM-c03-2	Gh_A03G0205	SCT	Spermidine coumaroyl CoA acyltransferase	3144010	3145392
qSYM-c03-2	Gh_A03G0206	At2g30270	Protein LURP-one-related 7	3160276	3162437
qSYM-c03-2	Gh_A03G0207	At5g58410	E3 ubiquitin-protein ligase listerin	3168031	3178578
qSYM-c03-2	Gh_A03G0208	U2B''	U2 small nuclear ribonucleoprotein B''	3181317	3183593
qSYM-c03-2	Gh_A03G0209	FBL3	F-box/LRR-repeat protein 3	3185297	3189477
qSYM-c03-2	Gh_A03G0210	WRKY33	Probable WRKY transcription factor 33	3197808	3200021
qSYM-c03-2	Gh_A03G0211	NA	NA	3207405	3207863
qSYM-c03-2	Gh_A03G0212	EXO70B1	Exocyst complex component EXO70B1	3226810	3228732
qSYM-c03-2	Gh_A03G0213	SNX2A	Sorting nexin 2A	3229926	3233559
qSYM-c03-2	Gh_A03G0214	Ifi30	Gamma-interferon-inducible lysosomal thiol reductase	3264951	3267641
qSYM-c04-1	Gh_A04G0078	SCPL44	Serine carboxypeptidase-like 44	1065583	1119604
qSYM-c04-1	Gh_A04G0079	At3g07100	Protein transport protein Sec24-like At3g07100	1142018	1147637
qSYM-c04-1	Gh_A04G0080	At2g05160	Zinc finger CCCH domain-containing protein 18	1162409	1177855
qSYM-c04-1	Gh_A04G0081	SCL5	Scarecrow-like protein 5	1193621	1195147
qSYM-c04-1	Gh_A04G0082	RNP1	Heterogeneous nuclear ribonucleoprotein 1	1206009	1207678
qSYM-c04-1	Gh_A04G0083	NA	NA	1211468	1212568
qSYM-c04-1	Gh_A04G0084	RPS8	40S ribosomal protein S8	1220746	1223230
qSYM-c04-1	Gh_A04G0085	NA	NA	1225842	1226030
qSYM-c04-1	Gh_A04G0086	XYLT	Beta-(1,2)-xylosyltransferase	1228633	1231251
qSYM-c04-1	Gh_A04G0087	At1g50590	Pirin-like protein At1g50590	1232688	1235067
qSYM-c04-1	Gh_A04G0088	GDPDL3	Glycerophosphodiester phosphodiesterase GDPDL3	1241940	1247200
qSYM-c04-1	Gh_A04G0089	SIP2-1	Probable aquaporin SIP2-1	1261949	1263832
qSYM-c04-1	Gh_A04G0090	DIR1	Putative lipid-transfer protein DIR1	1265778	1266128
qSYM-c04-1	Gh_A04G0091	AT5	Probable long-chain-alcohol O-fatty-acyltransferase 5	1274474	1275493
qSYM-c04-1	Gh_A04G0092	NA	NA	1275541	1275819
qSYM-c04-1	Gh_A04G0093	AT5	Probable long-chain-alcohol O-fatty-acyltransferase 5	1295199	1296218
qSYM-c04-1	Gh_A04G0094	NA	NA	1296266	1296544
qSYM-c04-1	Gh_A04G0095	NA	Long-chain-alcohol O-fatty-acyltransferase	1297963	1298950
qSYM-c04-1	Gh_A04G0096	NA	Long-chain-alcohol O-fatty-acyltransferase	1303574	1303960
qSYM-c04-1	Gh_A04G0097	TOP1	DNA topoisomerase 1	1308559	1313566
qSYM-c04-1	Gh_A04G0098	SYP51	Syntaxin-51	1318612	1321189
qSYM-c04-1	Gh_A04G0099	TAF6	Transcription initiation factor TFIID subunit 6	1324553	1327882
qSYM-c04-1	Gh_A04G0100	VHA-e1	V-type proton ATPase subunit e1	1329745	1332008
qSYM-c04-1	Gh_A04G0101	PPX2	Serine/threonine-protein phosphatase PP-X isozyme 2	1332883	1335370
qSYM-c04-1	Gh_A04G0102	LIP5	Protein HOMOLOG OF MAMMALIAN LYST-INTERACTING PROTEIN 5	1345505	1349181
qSYM-c04-1	Gh_A04G0103	MAP65-1	65-kDa microtubule-associated protein 1	1351028	1355029
qSYM-c04-1	Gh_A04G0104	grpE	Protein GrpE	1358946	1361534
qSYM-c04-1	Gh_A04G0105	NA	NA	1363170	1366013
qSYM-c04-1	Gh_A04G0106	ERF3	Ethylene-responsive transcription factor 3	1377745	1378362
qSYM-c04-1	Gh_A04G0107	NA	Flavonol sulfotransferase-like	1412327	1413655
qSYM-c04-1	Gh_A04G0108	NA	Flavonol sulfotransferase-like	1430659	1431639
qSYM-c04-1	Gh_A04G0109	At4g29360	Glucan endo-1,3-beta-glucosidase 12	1445039	1446773
qSYM-c04-1	Gh_A04G0110	SUMO2	Small ubiquitin-related modifier 2	1456539	1457714
qSYM-c04-1	Gh_A04G0111	MOCS3	Adenylyltransferase and sulfurtransferase MOCS3	1469089	1473312
qSYM-c04-1	Gh_A04G0112	PYRB2	Aspartate carbamoyltransferase 2, chloroplastic	1474232	1476162
qSYM-c04-1	Gh_A04G0113	NA	NA	1480100	1480324
qSYM-c04-1	Gh_A04G0114	VTC2	GDP-L-galactose phosphorylase 1	1482364	1484401
qSYM-c04-1	Gh_A04G0115	RTL2	Ribonuclease 3-like protein 2	1547120	1549857
qSYM-c04-1	Gh_A04G0116	SBE3	1,4-alpha-glucan-branching enzyme 3, chloroplastic/amyloplastic	1576999	1585219
qSYM-c04-1	Gh_A04G0117	Prosc	Proline synthase co-transcribed bacterial homolog protein	1585911	1588607
qSYM-c04-1	Gh_A04G0118	At5g35735	Cytochrome b561 and DOMON domain-containing protein At5g35735	1592769	1597088
qSYM-c04-1	Gh_A04G0119	At1g12280	Probable disease resistance protein At1g12280	1606849	1609579
qSYM-c04-1	Gh_A04G0120	At1g12280	Probable disease resistance protein At1g12280	1617440	1618471
qSYM-c04-1	Gh_A04G0121	At5g63020	Probable disease resistance protein At5g63020	1618651	1619169
qSYM-c04-1	Gh_A04G0122	At5g63020	Probable disease resistance protein At5g63020	1619181	1620155
qSYM-c04-1	Gh_A04G0123	At5g47260	Probable disease resistance protein At5g47260	1624896	1626194
qSYM-c04-1	Gh_A04G0124	At5g63020	Probable disease resistance protein At5g63020	1626291	1627279
qSYM-c04-1	Gh_A04G0125	At1g50720	Stigma-specific STIG1-like protein 3	1633394	1633765
qSYM-c04-1	Gh_A04G0126	Sfswap	Splicing factor, suppressor of white-apricot homolog	1647086	1651595
qSYM-c04-1	Gh_A04G0127	At4g26910	Dihydrolipoyllysine-residue succinyltransferase component of 2-oxoglutarate dehydrogenase complex 2, mitochondrial	1659119	1663336
qSYM-c04-1	Gh_A04G0128	NA	NA	1671788	1672135
qSYM-c04-1	Gh_A04G0129	RAB3GAP1	Rab3 GTPase-activating protein catalytic subunit	1676897	1682209
qSYM-c04-1	Gh_A04G0130	MSH5	DNA mismatch repair protein MSH5	1690744	1700537
qSYM-c04-1	Gh_A04G0131	At5g55050	GDSL esterase/lipase At5g55050	1703950	1708421
qSYM-c04-1	Gh_A04G0132	BRPF3	Bromodomain and PHD finger-containing protein 3	1727873	1732466
qSYM-c04-1	Gh_A04G0133	VIT_19s0090g00570	CASP-like protein 2D1	1733766	1734903
qSYM-c04-1	Gh_A04G0134	B3GALT2	Probable beta-1,3-galactosyltransferase 2	1738064	1742246
qSYM-c04-1	Gh_A04G0135	GGPPS1	Heterodimeric geranylgeranyl pyrophosphate synthase large subunit 1, chloroplastic	1767807	1768745
qSYM-c04-1	Gh_A04G0136	NA	Aconitate hydratase, cytoplasmic	1777632	1794833
qSYM-c04-1	Gh_A04G0137	NA	NA	1856056	1856598
qSYM-c04-1	Gh_A04G0138	LAT59	Probable pectate lyase P59	2076617	2078570
qSYM-c04-1	Gh_A04G0139	3GGT	Anthocyanidin 3-O-glucoside 2''-O-glucosyltransferase	2085378	2086748
qSYM-c04-1	Gh_A04G0140	NA	NA	2094549	2094933
qSYM-c04-1	Gh_A04G0141	PPI1	Proton pump-interactor 1	2096502	2100696
qSYM-c04-1	Gh_A04G0142	dlc-1	Dynein light chain 1, cytoplasmic	2107247	2109624
qSYM-c04-1	Gh_A04G0143	PPI1	Proton pump-interactor 1	2274521	2276702
qSYM-c04-1	Gh_A04G0144	LAT59	Probable pectate lyase P59	2279720	2281708
qSYM-c04-1	Gh_A04G0145	RPPL1	Putative disease resistance RPP13-like protein 1	2338556	2339149
qSYM-c04-1	Gh_A04G0146	RPPL1	Putative disease resistance RPP13-like protein 1	2344933	2348255
qSYM-c04-1	Gh_A04G0147	2004-08-01	AUGMIN subunit 4	2357538	2395910
qSYM-c04-1	Gh_A04G0148	CPK9	Calcium-dependent protein kinase 9	2396366	2399478
qSYM-c04-1	Gh_A04G0149	NIP1	NEP1-interacting protein 1	2426272	2427414
qSYM-c04-1	Gh_A04G0150	At5g41620	Uncharacterized protein At5g41620	2429276	2432309
qSYM-c04-1	Gh_A04G0151	NA	NA	2469170	2469529
qSYM-c04-1	Gh_A04G0152	Rnaseh2c	Ribonuclease H2 subunit C	2475430	2476985
qSYM-c04-1	Gh_A04G0153	CID3	Polyadenylate-binding protein-interacting protein 3	2479033	2483864
qSYM-c04-1	Gh_A04G0154	RH32	DEAD-box ATP-dependent RNA helicase 32	2485750	2511420
qSYM-c04-1	Gh_A04G0155	At1g28570	GDSL esterase/lipase At1g28570	2542200	2582620
qSYM-c04-1	Gh_A04G0156	At3g47570	Probable LRR receptor-like serine/threonine-protein kinase At3g47570	2637828	2639015
qSYM-c04-1	Gh_A04G0157	At3g47570	Probable LRR receptor-like serine/threonine-protein kinase At3g47570	2639927	2640544
qSYM-c04-1	Gh_A04G0158	At5g54890	CRS2-associated factor 2, mitochondrial	2697968	2700012
qSYM-c04-1	Gh_A04G0159	Dtwd2	DTW domain-containing protein 2	2700513	2701580
qSYM-c04-1	Gh_A04G0160	FAX6	Protein FATTY ACID EXPORT 6	2702735	2704714
qSYM-c04-1	Gh_A04G0161	NA	NA	2705802	2708411
qSYM-c04-1	Gh_A04G0162	TOR1	Microtubule-associated protein TORTIFOLIA1	2739234	2742941
qSYM-c04-1	Gh_A04G0163	CYP93A1	3,9-dihydroxypterocarpan 6A-monooxygenase	2794777	2834606
qSYM-c04-1	Gh_A04G0164	NA	NA	2897009	2897548
qSYM-c04-1	Gh_A04G0165	CYP75B1	Flavonoid 3'-monooxygenase	2953077	2954751
qSYM-c04-1	Gh_A04G0166	NA	NA	2961010	2961354
qSYM-c04-1	Gh_A04G0167	LTD	Protein LHCP TRANSLOCATION DEFECT	2967487	2969338
qSYM-c04-1	Gh_A04G0168	NA	NA	3037478	3037977
qSYM-c04-1	Gh_A04G0169	NA	NA	3079257	3106311
qSYM-c04-1	Gh_A04G0170	GPT1	Glucose-6-phosphate/phosphate translocator 1, chloroplastic	3190662	3193663
qSYM-c04-1	Gh_A04G0171	SCPL41	Serine carboxypeptidase-like 41	3263647	3267864
qSYM-c04-1	Gh_A04G0172	SCPL41	Serine carboxypeptidase-like 41	3308507	3312741
qSYM-c04-1	Gh_A04G0173	PDIL5-3	Protein disulfide-isomerase 5-3	3322679	3328184
qSYM-c04-1	Gh_A04G0174	At2g25060	Early nodulin-like protein 1	3329423	3330576
qSYM-c04-1	Gh_A04G0175	TBC1D15	TBC1 domain family member 15	3333645	3338325
qSYM-c04-1	Gh_A04G0176	At1g54290	Protein translation factor SUI1 homolog 2	3344458	3345276
qSYM-c04-1	Gh_A04G0177	At1g54290	Protein translation factor SUI1 homolog 2	3356653	3357162
qSYM-c04-1	Gh_A04G0178	AT2S3	2S seed storage protein 3	3365098	3365514
qSYM-c04-1	Gh_A04G0179	NA	NA	3372398	3373874
qSYM-c04-1	Gh_A04G0180	UBQ10	Polyubiquitin 10	3383872	3385245
qSYM-c04-1	Gh_A04G0181	UBQ3	Polyubiquitin 3	3389366	3390205
qSYM-c04-1	Gh_A04G0182	UBQ10	Polyubiquitin 10	3395260	3396633
qSYM-c04-1	Gh_A04G0183	At4g27220	Probable disease resistance protein At4g27220	3399995	3410457
qSYM-c04-1	Gh_A04G0184	NA	NA	3452442	3452831
qSYM-c04-1	Gh_A04G0185	GIP	Copia protein	3459672	3460439
qSYM-c04-1	Gh_A04G0186	PARP1	Poly [ADP-ribose] polymerase 1	3471996	3477434
qSYM-c04-1	Gh_A04G0187	NA	NA	3526342	3528715
qSYM-c04-1	Gh_A04G0188	At4g27220	Probable disease resistance protein At4g27220	3556761	3607374
qSYM-c04-1	Gh_A04G0189	NA	NA	3646367	3646760
qSYM-c04-1	Gh_A04G0190	At5g49610	F-box protein At5g49610	3647439	3648718
qSYM-c04-1	Gh_A04G0191	NA	NA	3654753	3671956
qSYM-c04-1	Gh_A04G0192	ATK3	Kinesin-3	3674828	3680233
qSYM-c04-1	Gh_A04G0193	NA	NA	3698160	3700085
qSYM-c04-1	Gh_A04G0194	FH11	Formin-like protein 11	3705793	3710171
qSYM-c04-1	Gh_A04G0195	RAT5	Histone H2A.6	3712192	3712989
qSYM-c04-1	Gh_A04G0196	CIGR1	Chitin-inducible gibberellin-responsive protein 1	3725106	3726839
qSYM-c04-1	Gh_A04G0197	NA	NA	3776289	3778323
qSYM-c04-1	Gh_A04G0198	NA	(+)-delta-cadinene synthase isozyme XC14	3798059	3894577
qSYM-c04-1	Gh_A04G0199	NA	NA	4014871	4015491
qSYM-c04-1	Gh_A04G0200	MORF9	Multiple organellar RNA editing factor 9, chloroplastic	4028072	4030226
qSYM-c04-1	Gh_A04G0201	BHLH123	Transcription factor bHLH123	4062775	4065919
qSYM-c04-1	Gh_A04G0202	At4g27270	Probable NAD(P)H dehydrogenase (quinone) FQR1-like 1	4074984	4076024
qSYM-c04-1	Gh_A04G0203	At4g27290	G-type lectin S-receptor-like serine/threonine-protein kinase At4g27290	4087213	4093557
qSYM-c04-1	Gh_A04G0204	SD18	Receptor-like serine/threonine-protein kinase SD1-8	4098417	4102491
qSYM-c04-1	Gh_A04G0205	B120	G-type lectin S-receptor-like serine/threonine-protein kinase B120	4107503	4110608
qSYM-c04-1	Gh_A04G0206	NA	NA	4114498	4115889
qSYM-c04-1	Gh_A04G0207	B120	G-type lectin S-receptor-like serine/threonine-protein kinase B120	4122646	4132734
qSYM-c04-1	Gh_A04G0208	PBP1	Calcium-binding protein PBP1	4212587	4212925
qSYM-c04-1	Gh_A04G0209	BBX32	B-box zinc finger protein 32	4227539	4228666
qSYM-c04-1	Gh_A04G0210	NA	NA	4243048	4243716
qSYM-c04-1	Gh_A04G0211	naa50	N-alpha-acetyltransferase 50	4249403	4251781
qSYM-c04-1	Gh_A04G0212	Naa50	N-alpha-acetyltransferase 50	4302818	4305075
qSYM-c04-1	Gh_A04G0213	NA	NA	4313478	4314092
qSYM-c04-1	Gh_A04G0214	rnhA	Ribonuclease HI	4320208	4320531
qSYM-c04-1	Gh_A04G0215	san	Probable N-acetyltransferase san	4321480	4321653
qSYM-c04-1	Gh_A04G0216	NA	NA	4346361	4349773
qSYM-c04-1	Gh_A04G0217	MRE11	Double-strand break repair protein MRE11	4372392	4406540
qSYM-c04-1	Gh_A04G0218	CAB13	Chlorophyll a-b binding protein 13, chloroplastic	4411283	4412612
qSYM-c04-1	Gh_A04G0219	VIII-2	Myosin-2	4414037	4423036
qSYM-c04-1	Gh_A04G0220	AGD5	Probable ADP-ribosylation factor GTPase-activating protein AGD5	4440893	4444792
qSYM-c04-1	Gh_A04G0221	NA	NA	4457889	4458395
qSYM-c04-1	Gh_A04G0222	SGR5	Protein SHOOT GRAVITROPISM 5	4464062	4465256
qSYM-c04-1	Gh_A04G0223	NA	NA	4549203	4549476
qSYM-c04-1	Gh_A04G0224	AOP1.2	Probable 2-oxoglutarate-dependent dioxygenase AOP1.2	4551051	4564676
qSYM-c04-1	Gh_A04G0225	AOP1.2	Probable 2-oxoglutarate-dependent dioxygenase AOP1.2	4581566	4583225
qSYM-c04-1	Gh_A04G0226	NA	NA	4586520	4586873
qSYM-c04-1	Gh_A04G0227	AOP1.2	Probable 2-oxoglutarate-dependent dioxygenase AOP1.2	4593956	4595535
qSYM-c04-1	Gh_A04G0228	AOP1.2	Probable 2-oxoglutarate-dependent dioxygenase AOP1.2	4602785	4641714
qSYM-c04-1	Gh_A04G0229	NA	NA	4664064	4665098
qSYM-c04-1	Gh_A04G0230	THE1	Receptor-like protein kinase THESEUS 1	4665282	4666922
qSYM-c04-1	Gh_A04G0231	THE1	Receptor-like protein kinase THESEUS 1	4667204	4667782
qSYM-c04-1	Gh_A04G0232	menG	Demethylmenaquinone methyltransferase	4739658	4740996
qSYM-c04-1	Gh_A04G0233	NA	NA	4745919	4746313
qSYM-c04-1	Gh_A04G0234	At5g05400	Putative disease resistance protein At5g05400	4746327	4748900
qSYM-c04-1	Gh_A04G0235	PXMP2	Peroxisomal membrane protein 2	4781632	4784155
qSYM-c04-1	Gh_A04G0236	PYRE-F	Uridine 5'-monophosphate synthase	4803645	4806224
qSYM-c04-1	Gh_A04G0237	NA	NA	4849084	4849617
qSYM-c04-1	Gh_A04G0238	NA	NA	4850446	4850790
qSYM-c04-1	Gh_A04G0239	NA	NA	4971478	4973488
qSYM-c04-1	Gh_A04G0240	PORA	Protochlorophyllide reductase, chloroplastic	4978847	4980394
qSYM-c04-1	Gh_A04G0241	UBP1B	Oligouridylate-binding protein 1B	4990571	4992835
qSYM-c04-1	Gh_A04G0242	NCS2	S-norcoclaurine synthase 2	5003113	5004013
qSYM-c04-1	Gh_A04G0243	NA	NA	5005643	5005988
qSYM-c04-1	Gh_A04G0244	NCS2	S-norcoclaurine synthase 2	5087078	5088334
qSYM-c04-1	Gh_A04G0245	CBSX5	CBS domain-containing protein CBSX5	5209395	5210633
qSYM-c04-1	Gh_A04G0246	UVR8	Ultraviolet-B receptor UVR8	5216030	5220482
qSYM-c04-1	Gh_A04G0247	NA	NA	5241122	5241406
qSYM-c04-1	Gh_A04G0248	NUG2	Nuclear/nucleolar GTPase 2	5256178	5259961
qSYM-c04-1	Gh_A04G0249	NA	NA	5275264	5276034
qSYM-c04-1	Gh_A04G0250	TPS10	Terpene synthase 10	5331675	5341794
qSYM-c04-1	Gh_A04G0251	NA	NA	5426671	5429827
qSYM-c04-1	Gh_A04G0252	SPBC2A9.03	Uncharacterized WD repeat-containing protein C2A9.03	5431442	5433497
qSYM-c04-1	Gh_A04G0253	RMA1H1	E3 ubiquitin-protein ligase RMA1H1	5437009	5437764
qSYM-c04-1	Gh_A04G0254	At3g15360	Thioredoxin M4, chloroplastic	5444173	5446409
qSYM-c04-1	Gh_A04G0255	DTX14	Protein DETOXIFICATION 14	5448552	5450960
qSYM-c04-1	Gh_A04G0256	ATL19	Putative RING-H2 finger protein ATL19	5940190	5940666
qSYM-c04-1	Gh_A04G0257	SE2	Acidic endochitinase SE2	5946290	5946493
qSYM-c04-1	Gh_A04G0258	At1g12700	Putative pentatricopeptide repeat-containing protein At1g12700, mitochondrial	5952697	5953824
qSYM-c04-1	Gh_A04G0259	NA	Acidic endochitinase	5956151	5956981
qSYM-c04-1	Gh_A04G0260	NA	NA	5958487	5959464
qSYM-c04-1	Gh_A04G0261	NA	NA	5962420	5964366
qSYM-c04-1	Gh_A04G0262	NA	Metallothionein-like protein type 3	5971716	5972447
qSYM-c04-1	Gh_A04G0263	NA	Metallothionein-like protein type 3	5974573	5975201
qSYM-c04-1	Gh_A04G0264	NA	NA	5975637	5978453
qSYM-c04-1	Gh_A04G0265	NA	Metallothionein-like protein type 3	5995105	5995928
qSYM-c04-1	Gh_A04G0266	COX17-1	Cytochrome c oxidase copper chaperone 1	5998027	5998266
qSYM-c04-1	Gh_A04G0267	NA	NA	6002648	6003082
qSYM-c04-1	Gh_A04G0268	PPI1	Proton pump-interactor 1	6013271	6015369
qSYM-c04-1	Gh_A04G0269	RPS5	Disease resistance protein RPS5	6025144	6027990
qSYM-c04-1	Gh_A04G0270	NA	NA	6071728	6072936
qSYM-c04-1	Gh_A04G0271	At1g59780	Putative disease resistance protein At1g59780	6076597	6080355
qSYM-c04-1	Gh_A04G0272	NA	NA	6094025	6096532
qSYM-c04-1	Gh_A04G0273	GRI	Protein GRIM REAPER	6184714	6185199
qSYM-c04-1	Gh_A04G0274	GRI	Protein GRIM REAPER	6199071	6199556
qSYM-c04-1	Gh_A04G0275	GRI	Protein GRIM REAPER	6203443	6203928
qSYM-c04-1	Gh_A04G0276	DRP5A	Dynamin-related protein 5A	6216382	6223121
qSYM-c04-1	Gh_A04G0277	VQ4	VQ motif-containing protein 4	6245633	6246313
qSYM-c04-1	Gh_A04G0278	At4g27520	Early nodulin-like protein 2	6255338	6258615
qSYM-c04-1	Gh_A04G0279	EMB2654	Pentatricopeptide repeat-containing protein At2g41720	6260273	6267872
qSYM-c04-1	Gh_A04G0280	GH3.17	Indole-3-acetic acid-amido synthetase GH3.17	6295356	6299386
qSYM-c04-1	Gh_A04G0281	GH3.17	Indole-3-acetic acid-amido synthetase GH3.17	6308669	6311104
qSYM-c04-1	Gh_A04G0282	DTX18	Protein DETOXIFICATION 18	6312741	6316923
qSYM-c04-1	Gh_A04G0283	PSKR2	Phytosulfokine receptor 2	6342357	6345512
qSYM-c04-1	Gh_A04G0284	At4g27220	Probable disease resistance protein At4g27220	6397370	6399958
qSYM-c04-1	Gh_A04G0285	RFL1	Disease resistance protein RFL1	6491076	6491945
qSYM-c04-1	Gh_A04G0286	At3g15260	Probable protein phosphatase 2C 39	6615487	6616031
qSYM-c04-1	Gh_A04G0287	At4g27220	Probable disease resistance protein At4g27220	6639565	6641553
qSYM-c04-1	Gh_A04G0288	At4g27190	Disease resistance protein At4g27190	6790568	6791581
qSYM-c04-1	Gh_A04G0289	RFL1	Disease resistance protein RFL1	6827824	6828678
qSYM-c04-1	Gh_A04G0290	At4g27190	Disease resistance protein At4g27190	6838162	6841249
qSYM-c04-1	Gh_A04G0291	At3g15260	Probable protein phosphatase 2C 39	6844015	6855808
qSYM-c04-1	Gh_A04G0292	At1g62930	Pentatricopeptide repeat-containing protein At1g62930, chloroplastic	6861356	6863791
qSYM-c04-1	Gh_A04G0293	At1g62930	Pentatricopeptide repeat-containing protein At1g62930, chloroplastic	6866736	6867911
qSYM-c04-1	Gh_A04G0294	NA	NA	6872880	6875911
qSYM-c04-1	Gh_A04G0295	EMB1444	Transcription factor EMB1444	6887750	6890001
qSYM-c04-1	Gh_A04G0296	LIMYB	L10-interacting MYB domain-containing protein	6918729	6919631
qSYM-c04-1	Gh_A04G0297	At1g62930	Pentatricopeptide repeat-containing protein At1g62930, chloroplastic	6933237	6934578
qSYM-c04-1	Gh_A04G0298	At1g62930	Pentatricopeptide repeat-containing protein At1g62930, chloroplastic	6938035	6939906
qSYM-c04-1	Gh_A04G0299	At1g62910	Pentatricopeptide repeat-containing protein At1g62910	6958902	6961157
qSYM-c04-1	Gh_A04G0300	At1g12700	Putative pentatricopeptide repeat-containing protein At1g12700, mitochondrial	6985378	6986790
qSYM-c04-1	Gh_A04G0301	svkA	Serine/threonine-protein kinase svkA	7004239	7014538
qSYM-c04-1	Gh_A04G0302	PRA1H	PRA1 family protein H	7016892	7018200
qSYM-c04-1	Gh_A04G0303	prmA	Ribosomal protein L11 methyltransferase	7019436	7022975
qSYM-c04-1	Gh_A04G0304	At5g53940	Protein yippee-like At5g53940	7023213	7029339
qSYM-c04-1	Gh_A04G0305	ERF4	Ethylene-responsive transcription factor 4	7037723	7038253
qSYM-c04-1	Gh_A04G0306	RPS20	30S ribosomal protein S20, chloroplastic	7045119	7047387
qSYM-c04-1	Gh_A04G0307	Psmd5	26S proteasome non-ATPase regulatory subunit 5	7049684	7056533
qSYM-c04-1	Gh_A04G0308	At1g62930	Pentatricopeptide repeat-containing protein At1g62930, chloroplastic	7067031	7068902
qSYM-c04-1	Gh_A04G0309	RFL1	Disease resistance protein RFL1	7081337	7086378
qSYM-c04-1	Gh_A04G0310	DAAT	D-amino-acid transaminase, chloroplastic	7126064	7128385
qSYM-c04-1	Gh_A04G0311	At3g03300	Endoribonuclease Dicer homolog 2	7175960	7232649
qSYM-c04-1	Gh_A04G0312	RABA1F	Ras-related protein RABA1f	7248053	7255850
qSYM-c04-1	Gh_A04G0313	Os03g0144800	Xyloglucan galactosyltransferase KATAMARI1 homolog	7257198	7258529
qSYM-c04-1	Gh_A04G0314	PDAP1	28 kDa heat- and acid-stable phosphoprotein	7283784	7290558
qSYM-c04-1	Gh_A04G0315	At4g27190	Disease resistance protein At4g27190	7436039	7438423
qSYM-c04-1	Gh_A04G0316	TCP4	Transcription factor TCP4	7567625	7568830
qSYM-c04-1	Gh_A04G0317	NA	NA	7620656	7621009
qSYM-c04-1	Gh_A04G0318	waaK	Lipopolysaccharide 1,2-N-acetylglucosaminetransferase	7650089	7651555
qSYM-c04-1	Gh_A04G0319	GTE4	Transcription factor GTE4	7656089	7658728
qSYM-c04-1	Gh_A04G0320	MMDHI	Malate dehydrogenase, mitochondrial	7659308	7661994
qSYM-c04-1	Gh_A04G0321	IPT9	tRNA dimethylallyltransferase 9	7663784	7668355
qSYM-c04-1	Gh_A04G0322	TBL31	Protein trichome birefringence-like 31	7687240	7688371
qSYM-c04-1	Gh_A04G0323	NA	NA	7688694	7691771
qSYM-c04-1	Gh_A04G0324	UBA2C	UBP1-associated protein 2C	7697727	7699025
qSYM-c04-1	Gh_A04G0325	NA	NA	7933704	7933928
qSYM-c04-1	Gh_A04G0326	NA	NA	8083426	8083641
[truncated: 22,795 more rows]
