# Supplementary material for: Identification of Stable and Multiple Environment Interaction QTLs and Candidate Genes for Fiber Productive Traits Under Irrigated and Water Stress Conditions Using Intraspecific RILs of Gossypium hirsutum var. MCU5 X TCH1218
Source: Front Plant Sci. 2022 Apr 18;13:851504. doi: 10.3389/fpls.2022.851504 (PMC9062235; doi:10.3389/fpls.2022.851504)
Supplement: Supplementary file 3 [file Table_3.XLSX]

## Sheet: GO
Supplementary Table S3 Gene ontology enrichment analysis of the genes located in the stable and major QTL intervals.
Accession	Name	GO Type	Input Gene Number	All Gene Number	Q-value	Gene IDs of Candidate Genes identified in this study
GO:0009607	response to biotic stimulus	biological_process	12 (1.85%)	93 (0.21%)	5.2e-08	Gh_A02G0127,Gh_A02G0128,Gh_A02G0136,Gh_A02G0137,Gh_A02G0169,Gh_A02G0228,Gh_A02G0250,Gh_A02G0251,Gh_A02G0252,Gh_A02G0254,Gh_A02G0256,Gh_A02G0257,Gh_A02G0363
GO:0006952	defense response	biological_process	13 (2.00%)	173 (0.39%)	7.2e-06	Gh_A02G0498,Gh_A02G0499,Gh_A02G0500,Gh_A02G0502,Gh_A02G0503,Gh_A02G0504,Gh_A02G0505,Gh_A02G0507,Gh_A02G0508,Gh_A02G0509,Gh_A02G0510,Gh_A02G0511
GO:0006950	response to stress	biological_process	14 (2.16%)	210 (0.47%)	5.2e-05	Gh_A02G0178,Gh_A02G0179,Gh_A02G0180,Gh_A02G0184
GO:0009607	response to biotic stimulus	biological_process	11 (1.62%)	93 (0.21%)	2.3e-06	Gh_A02G0498,Gh_A02G0499,Gh_A02G0500,Gh_A02G502,Gh_A02G0503,Gh_A02G0504,Gh_A02G0505,Gh_A02G0507,Gh_A02G0508,Gh_A02G0509,Gh_A02G0510,Gh_A02G0511,Gh_A02G0615,Gh_A02G0511,Gh_A02G0615
GO:0030007	cellular potassium ion homeostasis	biological_process	3 (0.80%)	9 (0.02%)	2.4e-05	Gh_A08G0194,Gh_A08G0219,Gh_A08G0220,Gh_A08G0288,Gh_A08G0378,Gh_A08G0682,Gh_A08G0693,Gh_A08G0694,Gh_A08G0776,Gh_A08G0996,Gh_A08G0997,Gh_A08G0998,Gh_A08G1030,Gh_A08G1045
GO:0035556	intracellular signal transduction	biological_process	8 (2.13%)	121 (0.27%)	2.6e-05	Gh_A10G1491,Gh_A10G1494,Gh_A10G1505,Gh_A10G1506,Gh_A10G1507,Gh_A10G1508,Gh_A10G1509,Gh_A10G1510,Gh_A10G1512,Gh_A10G1513,Gh_A10G1514
GO:0048544	recognition of pollen	biological_process	7 (1.87%)	116 (0.26%)	9.1e-05	Gh_A10G1922,Gh_A10G1923,Gh_A10G1924,Gh_A10G1925,Gh_A10G1926
GO:0050826	response to freezing	biological_process	4 (0.65%)	14 (0.03%)	9.2e-05	Gh_D01G0725,Gh_D01G0726,Gh_D01G0727
GO:0050826	response to freezing	biological_process	4 (0.65%)	14 (0.03%)	9.7e-05	Gh_A10G1874,Gh_A10G1875,Gh_A10G1876,Gh_A10G1916,Gh_A10G1917,Gh_A10G1918,Gh_A10G1929,Gh_D01G0486
GO:0048544	recognition of pollen	biological_process	10 (1.62%)	116 (0.26%)	1.4e-05	Gh_D01G0688,Gh_D01G0725,Gh_D01G0726,Gh_D01G0727
GO:0050826	response to freezing	biological_process	6 (0.94%)	14 (0.03%)	4.1e-08	Gh_A10G1874,Gh_A10G1875,Gh_A10G1876,Gh_A10G1916,Gh_A10G1917,Gh_A10G1918,Gh_A10G1929
GO:0007015	actin filament organization	biological_process	4 (0.67%)	15 (0.03%)	4.5e-05	Gh_D01G0469,Gh_D01G0546,Gh_D01G0547,Gh_D01G0548,Gh_D01G0549,Gh_D01G0550,Gh_D01G0552
GO:0005774	vacuolar membrane	cellular_component	4 (1.07%)	24 (0.05%)	3.1e-05	Gh_D03G1640,Gh_D13G1197,Gh_D13G1606,Gh_D13G1766,Gh_D13G1767,Gh_D13G1770,Gh_D13G1771,Gh_D13G1772,Gh_D13G1773,Gh_D13G1775,Gh_D13G1779
GO:0047134	protein-disulfide reductase activity	molecular_function	13 (2.00%)	109 (0.24%)	5.2e-08	Gh_D13G1182,Gh_D13G1197,Gh_D13G1766,Gh_D13G1767,Gh_D13G1770,Gh_D13G1771,Gh_D13G1772,Gh_D13G1773,Gh_D13G1775,Gh_D13G1779
GO:0008430	selenium binding	molecular_function	4 (0.62%)	10 (0.02%)	5e-06	Gh_D04G0657,Gh_D04G0658,Gh_D04G0661,Gh_D04G0662
GO:0004866	endopeptidase inhibitor activity	molecular_function	5 (1.33%)	22 (0.05%)	1.8e-06	Gh_D04G0657,Gh_D04G0658,Gh_D04G0661,Gh_D04G0662
GO:0047134	protein-disulfide reductase activity	molecular_function	7 (1.87%)	109 (0.24%)	6.9e-05	Gh_D11G2478,Gh_D11G2479,Gh_D11G2481,Gh_D11G2482,Gh_D11G2483,Gh_D11G2484,Gh_D11G2485,Gh_D11G2486,Gh_D11G2487,Gh_D11G2488,Gh_D11G2490,Gh_D11G2491,Gh_D11G2492,Gh_D11G2493,Gh_D11G2494,Gh_D11G2496
GO:0045735	nutrient reservoir activity	molecular_function	11 (1.75%)	117 (0.26%)	1.2e-05	Gh_D11G2478,Gh_D11G2479,Gh_D11G2481,Gh_D11G2482,Gh_D11G2483,Gh_D11G2484,Gh_D11G2485,Gh_D11G2486,Gh_D11G2487,Gh_D11G2488,Gh_D11G2490,Gh_D11G2491,Gh_D11G2492,Gh_D11G2493,Gh_D11G2494,Gh_D11G2496
GO:0030145	manganese ion binding	molecular_function	10 (1.59%)	118 (0.26%)	5.4e-05	Gh_D11G2547,Gh_D11G2891,Gh_D11G2892,Gh_D11G2893,Gh_D11G2894,Gh_D11G2895,Gh_D11G2896,Gh_D11G2897,Gh_D11G2902,Gh_D11G2904,Gh_D11G2905,Gh_D11G3029
GO:0045735	nutrient reservoir activity	molecular_function	16 (2.60%)	117 (0.26%)	3.9e-11	Gh_D11G2891,Gh_D11G2892,Gh_D11G2893,Gh_D11G2894,Gh_D11G2895,Gh_D11G2896,Gh_D11G2897,Gh_D11G2902,Gh_D11G2904,Gh_D11G2905
GO:0030145	manganese ion binding	molecular_function	16 (2.60%)	118 (0.26%)	3.9e-11	Gh_D04G0233,Gh_D04G0234,Gh_D04G0238,Gh_D04G0239,Gh_D04G0242,Gh_D04G0243,Gh_D04G0245,Gh_D11G2915,Gh_D11G2917,Gh_D11G2918
GO:0016829	lyase activity	molecular_function	12 (1.95%)	115 (0.26%)	2.7e-07	Gh_D04G0170,Gh_D04G0233,Gh_D04G0238,Gh_D04G0239,Gh_D04G0241,Gh_D04G0242,Gh_D04G0245,Gh_D11G2871,Gh_D11G2872,Gh_D11G2874,Gh_D11G2915,Gh_D11G2918
GO:0010333	terpene synthase activity	molecular_function	10 (1.62%)	94 (0.21%)	2e-06	Gh_D11G2426,Gh_D11G2523,Gh_D11G2669,Gh_D11G2670,Gh_D11G2671,Gh_D11G2672,Gh_D11G2889,Gh_D11G2903,Gh_D11G2914,Gh_D11G2924,Gh_D11G2936,Gh_D11G2949,Gh_D11G2950,Gh_D11G2969,Gh_D11G2970,Gh_D11G2979
GO:0004674	protein serine/threonine kinase activity	molecular_function	12 (1.95%)	174 (0.39%)	1.8e-05	Gh_D04G0657,Gh_D04G0658,Gh_D04G0661,Gh_D04G0662,Gh_D04G1286,Gh_D04G1287
GO:0043531	ADP binding	molecular_function	16 (2.60%)	303 (0.68%)	2e-05	Gh_A03G0106,Gh_A03G0108,Gh_A03G0110,Gh_A03G0112,Gh_A04G0119,Gh_A04G0121,Gh_A04G0122,Gh_A04G0124,Gh_A04G0146,Gh_A04G0183,Gh_A04G0188,Gh_A04G0234,Gh_A04G0269,Gh_A04G0271,Gh_A04G0284,Gh_A04G0285,Gh_A04G0287,Gh_A04G028,Gh_A04G0290,Gh_A04G0309,Gh_A04G0315
GO:0043531	ADP binding	molecular_function	21 (3.51%)	303 (0.68%)	2.5e-08	Gh_A02G1060,Gh_A02G1242,Gh_A02G1260,Gh_A02G1261,Gh_A02G1262
GO:0051015	actin filament binding	molecular_function	5 (0.83%)	25 (0.06%)	4.5e-05	Gh_A02G1242,Gh_A02G1260,Gh_A02G1261,Gh_A02G1262

## Sheet: KEGG
Accession	Name	Input Gene Number	All Gene Number	Q-value	Candidate genes
ko04626	Plant-pathogen interaction	4 (66.67%)	366 (2.98%)	1.3e-07	Gh_A08G0219,Gh_A08G0220,Gh_D11G2889,Gh_D11G2914
